# Supplementary material for: Identification of Potential Pathway Mediation Targets in Toll-like Receptor Signaling
Source: PubMed Central journal article supplement (PMC2634968; doi:10.1371/journal.pcbi.1000292), 2009-02-20

**Table S7: Reaction References**

| <b>Reaction Abbreviation</b> | <b>Citation (Title, authors, journal, PMID, publication year, publication month, publication day)</b>                                                                                                                                                                                                                                                             |
|------------------------------|-------------------------------------------------------------------------------------------------------------------------------------------------------------------------------------------------------------------------------------------------------------------------------------------------------------------------------------------------------------------|
| 14-3-3_KSR1_BIND             | C-TAK1 regulates Ras signaling by phosphorylating the MAPK scaffold, KSR1.,Müller J, Ory S, Copeland T, Piwnica-Worms H, Morrison DK.,Mol Cell.,11741534,2001,11                                                                                                                                                                                                  |
| 14-3-3_RAF1_BIND             | Phosphorylation and regulation of Raf by Akt (protein kinase B).,Zimmermann S, Moelling K.,Science.,10576742,1999,11,26                                                                                                                                                                                                                                           |
| 14-3-3_RAF1_BIND             | Untying the regulation of the Raf-1 kinase.,Dhillon AS, Kolch W.,Arch Biochem Biophys.,12127063,2002,8,1                                                                                                                                                                                                                                                          |
| ABIN_A20_BIND                | Structure-function analysis of the A20-binding inhibitor of NF-kappa B activation, ABIN-1.,Heyninck K, Kreike MM, Beyaert R.,FEBS Lett.,12586352,2003,2,11                                                                                                                                                                                                        |
| ABIN_A20_BIND                | The zinc finger protein A20 inhibits TNF-induced NF-kappaB-dependent gene expression by interfering with an RIP- or TRAF2-mediated transactivation signal and directly binds to a novel NF-kappaB-inhibiting protein ABIN.,Heyninck K, De Valck D, Vanden Berghe W, Van Criekinge W, Contreras R, Fiers W, Haegeman G, Beyaert R.,J Cell Biol.,10385526,1999,6,28 |
| AJUBA_CPX_BIND               | The LIM protein Ajuba influences interleukin-1-induced NF-kappaB activation by affecting the assembly and activity of the protein kinase Czeta/p62/TRAF6 signaling complex.,Feng Y, Longmore GD.,Mol Cell Biol.,15870274,2005,5                                                                                                                                   |
| AJUBA_CPX_BIND               | The atypical PKC-interacting protein p62 channels NF-kappaB activation by the IL-1-TRAF6 pathway.,Sanz L, Diaz-Meco MT, Nakano H, Moscat J.,EMBO J.,10747026,2000,4,3                                                                                                                                                                                             |
| AJUBA_CPX_IKK                | Activation of IkappaB kinase beta by protein kinase C isoforms.,Lallena MJ, Diaz-Meco MT, Bren G, Payá CV, Moscat J.,Mol Cell Biol.,10022904,1999,3                                                                                                                                                                                                               |
| AJUBA_CPX_PHOS               | Insulin and PIP3 activate PKC-zeta by mechanisms that are both dependent and independent of phosphorylation of activation loop (T410) and autophosphorylation (T560) sites.,Standaert ML, Bandyopadhyay G, Kanoh Y, Sajan MP, Farese RV.,Biochemistry,11141077,2001,1,9                                                                                           |
| AJUBA_CPX_PHOS               | The LIM protein Ajuba influences interleukin-1-induced NF-kappaB activation by affecting the assembly and activity of the protein kinase Czeta/p62/TRAF6 signaling complex.,Feng Y, Longmore GD.,Mol Cell Biol.,15870274,2005,5                                                                                                                                   |
| AKT_GSK3B                    | Inhibition of glycogen synthase kinase-3 by insulin mediated by protein kinase B.,Cross DA, Alessi DR, Cohen P, Andjelkovich M, Hemmings BA.,Nature.,8524413,1998,12,21                                                                                                                                                                                           |
| AKT_GSK3B                    | Toll-like receptor-mediated cytokine production is differentially regulated by glycogen synthase kinase 3.,Martin M, Rehani K, Jope RS, Michalek SM.,Nat Immunol.,16007092,2005,8                                                                                                                                                                                 |
| AKT_IKK                      | NF-kappaB activation by tumour necrosis factor requires the Akt serine-threonine kinase.,Ozes ON, Mayo LD, Gustin JA, Pfeffer SR, Pfeffer LM, Donner DB.,Nature,10485710,1999,9,2                                                                                                                                                                                 |
| AKT_IKK                      | Production of matrix metalloproteinase-9 by activated human monocytes involves a phosphatidylinositol-3 kinase/Akt/IKKalpha/NF-kappaB pathway.,Lu Y, Wahl LM.,J Leukoc Biol.,15800029,2005,7                                                                                                                                                                      |
| AKT_MAP3K3                   | Akt down-regulation of p38 signaling provides a novel mechanism of vascular endothelial growth factor-mediated cytoprotection in endothelial cells.,Gratton JP, Morales-Ruiz M, Kureishi Y, Fulton D, Walsh K, Sessa WC.,J Biol Chem.,11387313,2001,8,10                                                                                                          |
| AKT_MAP3K3                   | PI3K and negative regulation of TLR signaling.,Fukao T, Koyasu S.,Trends Immunol.,12860525,2003,7                                                                                                                                                                                                                                                                 |
| AKT_MAP3K5                   | Akt phosphorylates and negatively regulates apoptosis signal-regulating kinase 1.,Kim AH, Khursigara G, Sun X, Franke TF, Chao MV.,Mol Cell Biol.,11154276,2001,2                                                                                                                                                                                                 |

|                      |                                                                                                                                                                                                                                                                       |
|----------------------|-----------------------------------------------------------------------------------------------------------------------------------------------------------------------------------------------------------------------------------------------------------------------|
| AKT_MAP3K5           | PI3K and negative regulation of TLR signaling.,Fukao T, Koyasu S.,Trends Immunol.,12860525,2003,7                                                                                                                                                                     |
| AKT_PHOS             | Unravelling the activation mechanisms of protein kinase B/Akt.,Scheid MP, Woodgett JR.,FEBS Lett.,12829245,2003,7,3                                                                                                                                                   |
| AKT_RAF1             | Phosphorylation and regulation of Raf by Akt (protein kinase B).,Zimmermann S, Moelling K.,Science.,10576742,1999,11,26                                                                                                                                               |
| AKT_RAF1             | Untying the regulation of the Raf-1 kinase.,Dhillon AS, Kolch W.,Arch Biochem Biophys.,12127063,2002,8,1                                                                                                                                                              |
| AKT_TRAN             | Translocation of Akt/PKB to the nucleus of osteoblast-like MC3T3-E1 cells exposed to proliferative growth factors.,Borgatti P, Martelli AM, Bellacosa A, Casto R, Massari L, Capitani S, Neri LM.,FEBS Lett.,10899305,2000,7,14                                       |
| AKT_pai345p_hs_BIN D | Unravelling the activation mechanisms of protein kinase B/Akt.,Scheid MP, Woodgett JR.,FEBS Lett.,12829245,2003,7,3                                                                                                                                                   |
| AKT_pai345p_hs_DIS S | Unravelling the activation mechanisms of protein kinase B/Akt.,Scheid MP, Woodgett JR.,FEBS Lett.,12829245,2003,7,3                                                                                                                                                   |
| AP1_FOS_JUN_BIND     | AP-1 function and regulation,Karin M, Liu Z, Zandi E.,Curr Opin Cell Biol.,9069263,1997,4                                                                                                                                                                             |
| AP1_JUN_BIND         | AP-1 function and regulation,Karin M, Liu Z, Zandi E.,Curr Opin Cell Biol.,9069263,1997,4                                                                                                                                                                             |
| BTK_2PHOS            | Bruton's tyrosine kinase (Btk)-the critical tyrosine kinase in LPS signalling?,Jefferies CA, O'Neill LA.,Immunol Lett.,15081522,2004,3,29                                                                                                                             |
| BTK_CBL_BIND         | Bruton's tyrosine kinase (Btk)-the critical tyrosine kinase in LPS signalling?,Jefferies CA, O'Neill LA.,Immunol Lett.,15081522,2004,3,29                                                                                                                             |
| BTK_CBL_BIND         | Cbl-b negatively regulates B cell antigen receptor signaling in mature B cells through ubiquitination of the tyrosine kinase Syk.,Sohn HW, Gu H, Pierce SK.,J Exp Med.,12771181,2003,6,2                                                                              |
| BTK_CBL_BIND         | The protein product of the c-cbl protooncogene is phosphorylated after B cell receptor stimulation and binds the SH3 domain of Bruton's tyrosine kinase.,Cory GO, Lovering RC, Hinshelwood S, MacCarthy-Morrogh L, Levinsky RJ, Kinnon C.,J Exp Med.,7629518,1995,8,1 |
| BTK_IBTK_BIND        | Direct inhibition of Bruton's tyrosine kinase by IBtk, a Btk-binding protein.,Liu W, Quinto I, Chen X, Palmieri C, Rabin RL, Schwartz OM, Nelson DL, Scala G.,Nat Immunol.,11577348,2001,10                                                                           |
| BTK_PLCG             | Bruton's tyrosine kinase (Btk)-the critical tyrosine kinase in LPS signalling?,Jefferies CA, O'Neill LA.,Immunol Lett.,15081522,2004,3,29                                                                                                                             |
| BTK_PLCG             | Phospholipase D: a lipid centric review.,Jenkins GM, Frohman MA.,Cell Mol Life Sci.,16143829,2005,10                                                                                                                                                                  |
| BTK_SH3BP5_BIND      | Bruton's tyrosine kinase activity is negatively regulated by Sab, the Btk-SH3 domain-binding protein.,Yamadori T, Baba Y, Matsushita M, Hashimoto S, Kurosaki M, Kurosaki T, Kishimoto T, Tsukada S.,Proc Natl Acad Sci USA.,10339589,1999,5,25                       |
| BTK_UBIQ             | Bruton's tyrosine kinase (Btk)-the critical tyrosine kinase in LPS signalling?,Jefferies CA, O'Neill LA.,Immunol Lett.,15081522,2004,3,29                                                                                                                             |
| BTK_UBIQ             | Cbl-b negatively regulates B cell antigen receptor signaling in mature B cells through ubiquitination of the tyrosine kinase Syk.,Sohn HW, Gu H, Pierce SK.,J Exp Med.,12771181,2003,6,2                                                                              |
| BTK_UBIQ             | The protein product of the c-cbl protooncogene is phosphorylated after B cell receptor stimulation and binds the SH3 domain of Bruton's tyrosine kinase.,Cory GO, Lovering RC, Hinshelwood S, MacCarthy-Morrogh L, Levinsky RJ, Kinnon C.,J Exp Med.,7629518,1995,8,1 |
| BTK_VAV1             | Bruton's Tyrosine Kinase is involved in innate and adaptive immunity.,Brunner C, Müller B, Wirth T.,Histol Histopathol.,15944945,2005,7                                                                                                                               |
| BTK_VAV1             | Bruton's tyrosine kinase (Btk)-the critical tyrosine kinase in LPS signalling?,Jefferies CA, O'Neill LA.,Immunol Lett.,15081522,2004,3,29                                                                                                                             |

|                      |                                                                                                                                                                                                                                                       |
|----------------------|-------------------------------------------------------------------------------------------------------------------------------------------------------------------------------------------------------------------------------------------------------|
| BTK_pai345p_hs_BIN D | Bruton's tyrosine kinase (Btk)-the critical tyrosine kinase in LPS signalling?,Jefferies CA, O'Neill LA.,Immunol Lett.,15081522,2004,3,29                                                                                                             |
| CALPN_3ca2_BIND      | Calcium-activated neutral protease (calpain) system: structure, function, and regulation.,Croall DE, DeMartino GN.,Physiol Rev.,2057527,1991,7                                                                                                        |
| CALPN_3ca2_BIND      | Differential sensitivity of interleukin-1 alpha and -beta precursor proteins to cleavage by calpain, a calcium-dependent protease.,Kavita U, Mizel SB.,J Biol Chem.,7499244,1995,11,17                                                                |
| CAMK2_SERCA          | Identification of Ser38 as the site in cardiac sarcoplasmic reticulum Ca(2+)-ATPase that is phosphorylated by Ca2+/calmodulin-dependent protein kinase.,Toyofuku T, Curotto Kurzydowski K, Narayanan N, MacLennan DH.,J Biol Chem.,7929371,1994,10,21 |
| CAM_3ca2_BIND        | Calcium/calmodulin-dependent protein kinase II.,Colbran RJ, Schworer CM, Hashimoto Y, Fong YL, Rich DP, Smith MK, Soderling TR.,Biochem J.,2539803,1989,3,1                                                                                           |
| CAM_3ca2_BIND        | Interactive properties of calmodulin.,Cox JA.,Biochem J.,3281652,1988,2,1                                                                                                                                                                             |
| CAM_CAMK2_BIND       | Calcium/calmodulin-dependent protein kinase II.,Colbran RJ, Schworer CM, Hashimoto Y, Fong YL, Rich DP, Smith MK, Soderling TR.,Biochem J.,2539803,1989,3,1                                                                                           |
| CAM_CAMK2_CREB       | Calmodulin kinase II attenuation of gene transcription by preventing cAMP response element-binding protein (CREB) dimerization and binding of the CREB-binding protein.,Wu X, McMurray CT.,J Biol Chem.,11013247,2001,1,19                            |
| CAM_CAMK2_CREB-2     | Calmodulin kinase II attenuation of gene transcription by preventing cAMP response element-binding protein (CREB) dimerization and binding of the CREB-binding protein.,Wu X, McMurray CT.,J Biol Chem.,11013247,2001,1,19                            |
| CAM_CAMK2_IKK        | Calmodulin-dependent kinase II mediates T cell receptor/CD3- and phorbol ester-induced activation of IkappaB kinase.,Hughes K, Edin S, Antonsson A, Grundström T.,J Biol Chem.,11470799,2001,9,21                                                     |
| CAM_CAMK2_PHOS       | Regulation of the activities of multifunctional Ca2+/calmodulin-dependent protein kinases.,Fujisawa H.,J Biochem (Tokyo),11173518,2001,2                                                                                                              |
| CDC42_DEPH           | Rho GTPases and their effector proteins.,Bishop AL, Hall A.,Biochem J.,10816416,2000,6,1                                                                                                                                                              |
| CDC42_PHOS           | Rho GTPases and their effector proteins.,Bishop AL, Hall A.,Biochem J.,10816416,2000,6,1                                                                                                                                                              |
| CDC42_PHOS           | VAV proteins as signal integrators for multi-subunit immune-recognition receptors.,Turner M, Billadeau DD.,Nat Rev Immunol.,12094222,2002,7                                                                                                           |
| CDC42_VAV1_BIND      | Rho GTPases and their effector proteins.,Bishop AL, Hall A.,Biochem J.,10816416,2000,6,1                                                                                                                                                              |
| CDC42_VAV1_BIND      | VAV proteins as signal integrators for multi-subunit immune-recognition receptors.,Turner M, Billadeau DD.,Nat Rev Immunol.,12094222,2002,7                                                                                                           |
| CK2_IKBB             | Basal phosphorylation of the PEST domain in the I(kappa)B(beta) regulates its functional interaction with the c-rel proto-oncogene product.,Chu ZL, McKinsey TA, Liu L, Qi X, Ballard DW.,Mol Cell Biol.,8887627,1996,9                               |
| CK2_IKBB             | Distinct functional properties of IkappaB alpha and IkappaB beta.,Tran K, Merika M, Thanos D.,Mol Cell Biol.,9271416,1997,9                                                                                                                           |
| CK2_NFKB             | Post-translational modifications regulating the activity and function of the nuclear factor kappa B pathway.,Perkins ND.,Oncogene.,17072324,2006,10,30                                                                                                |
| CK2_NFKB             | Tumor necrosis factor alpha-induced phosphorylation of RelA/p65 on Ser529 is controlled by casein kinase II.,Wang D, Westerheide SD, Hanson JL, Baldwin AS. ,J Biol Chem.,10938077,2000,10,20                                                         |
| CK2_NFKB_P4K         | Post-translational modifications regulating the activity and function of the nuclear factor kappa B pathway.,Perkins ND.,Oncogene.,17072324,2006,10,30                                                                                                |
| CK2_NFKB_P4K         | Tumor necrosis factor alpha-induced phosphorylation of RelA/p65 on Ser529 is controlled by casein kinase II.,Wang D, Westerheide SD, Hanson JL, Baldwin AS. ,J Biol Chem.,10938077,2000,10,20                                                         |

|                     |                                                                                                                                                                                                                                   |
|---------------------|-----------------------------------------------------------------------------------------------------------------------------------------------------------------------------------------------------------------------------------|
| CREB_CBP_BIND       | Phosphorylated CREB binds specifically to the nuclear protein CBP.,Chrivia JC, Kwok RP, Lamb N, Hagiwara M, Montminy MR, Goodman RH.,Nature,8413673,1993,10,28                                                                    |
| CREB_CBP DISS       | CREB DNA binding activity is inhibited by glycogen synthase kinase-3 beta and facilitated by lithium.,Grimes CA, Jope RS.,J Neurochem.,11579131,2001,9                                                                            |
| CREB_CBP DISS2      | Calmodulin kinase II attenuation of gene transcription by preventing cAMP response element-binding protein (CREB) dimerization and binding of the CREB-binding protein.,Wu X, McMurray CT.,J Biol Chem.,11013247,2001,1,19        |
| CREB_DIME           | Cyclic adenosine 3',5'-monophosphate response element binding protein (CREB) and related transcription-activating deoxyribonucleic acid-binding proteins.,Meyer TE, Habener JF.,Endocr Rev.,8319595,1993,6                        |
| CTAK1_KSR1          | C-TAK1 regulates Ras signaling by phosphorylating the MAPK scaffold, KSR1.,Müller J, Ory S, Copeland T, Piwnica-Worms H, Morrison DK.,Mol Cell.,11741534,2001,11                                                                  |
| CTAK1_PHOS          | C-TAK1 regulates Ras signaling by phosphorylating the MAPK scaffold, KSR1.,Müller J, Ory S, Copeland T, Piwnica-Worms H, Morrison DK.,Mol Cell.,11741534,2001,11                                                                  |
| DAGK_PHOS           | Characterization of a Rac1- and RhoGDI-associated lipid kinase signaling complex.,Tolias KF, Couvillon AD, Cantley LC, Carpenter CL.,Mol Cell Biol.,9447972,1998,2                                                                |
| DAGK_PHOS           | Molecules in focus: diacylglycerol kinase.,Sakane F, Kanoh H.,Int J Biochem Cell Biol.,9438377,1997,10                                                                                                                            |
| DAGK_dag_hs         | Mammalian diacylglycerol kinases, a family of lipid kinases with signaling functions.,Topham MK, Prescott SM.,J Biol Chem.,10206945,1999,4,23                                                                                     |
| EEA1_DIME           | The endosome fusion regulator early-endosomal autoantigen 1 (EEA1) is a dimer.,Callaghan J, Simonsen A, Gaullier JM, Toh BH, Stenmark H.,Biochem J.,10024533,1999,3,1                                                             |
| EEA1_pail3p_hs_BIND | Signal transduction pathways mediated by the interaction of CpG DNA with Toll-like receptor 9.,Takeshita F, Gursel I, Ishii KJ, Suzuki K, Gursel M, Klinman DM.,Semin Immunol.,14751759,2004,2                                    |
| ELK1_DEPH           | Stimulation of Elk1 transcriptional activity by mitogen-activated protein kinases is negatively regulated by protein phosphatase 2B (calcineurin).,Tian J, Karin M.,J Biol Chem.,10329725,1999,5,21                               |
| ELK1_SRE_BIND       | The SRF accessory protein Elk-1 contains a growth factor-regulated transcriptional activation domain.,Marais R, Wynne J, Treisman R.,Cell,8386592,1993,4,23                                                                       |
| FADD_PCASP8_BIND    | Membrane oligomerization and cleavage activates the caspase-8 (FLICE/MACHalpha1) death signal.,Martin DA, Siegel RM, Zheng L, Lenardo MJ.,J Biol Chem.,9468483,1998,2,20                                                          |
| FADD_PCASP8_BIND    | The apoptotic signaling pathway activated by Toll-like receptor-2.,Aliprantis AO, Yang RB, Weiss DS, Godowski P, Zychlinsky A.,EMBO J.,10880445,2000,7,3                                                                          |
| FADD_PCASP8_BIND 2  | Membrane oligomerization and cleavage activates the caspase-8 (FLICE/MACHalpha1) death signal.,Martin DA, Siegel RM, Zheng L, Lenardo MJ.,J Biol Chem.,9468483,1998,2,20                                                          |
| FADD_PCASP8_BIND 2  | The apoptotic signaling pathway activated by Toll-like receptor-2.,Aliprantis AO, Yang RB, Weiss DS, Godowski P, Zychlinsky A.,EMBO J.,10880445,2000,7,3                                                                          |
| FMAP3K1_PROC        | ECSIT is an evolutionarily conserved intermediate in the Toll/IL-1 signal transduction pathway.,Kopp E, Medzhitov R, Carothers J, Xiao C, Douglas I, Janeway CA, Ghosh S.,Genes Dev.,10465784,1999,8,15                           |
| FMAP3K1_PROC        | Fas-induced proteolytic activation and intracellular redistribution of the stress-signaling kinase MEKK1.,Deak JC, Cross JV, Lewis M, Qian Y, Parrott LA, Distelhorst CW, Templeton DJ.,Proc Natl Acad Sci USA.,9576928,1998,5,12 |

|                    |                                                                                                                                                                                                                                                                      |
|--------------------|----------------------------------------------------------------------------------------------------------------------------------------------------------------------------------------------------------------------------------------------------------------------|
| FOS_DEGR           | c-Fos phosphorylation induced by H2O2 prevents proteasomal degradation of c-Fos in cardiomyocytes, Coronella-Wood J, Terrand J, Sun H, Chen QM., J Biol Chem, 15136564, 2004, 8, 6                                                                                   |
| FOS_DEPH           | c-Fos phosphorylation induced by H2O2 prevents proteasomal degradation of c-Fos in cardiomyocytes, Coronella-Wood J, Terrand J, Sun H, Chen QM., J Biol Chem, 15136564, 2004, 8, 6                                                                                   |
| FOS_JUN_BIND       | AP-1 function and regulation, Karin M, Liu Z, Zandi E., Curr Opin Cell Biol., 9069263, 1997, 4                                                                                                                                                                       |
| GENERIC_K_RAF1     | Phosphorylation of Raf-1 by p21-activated kinase 1 and Src regulates Raf-1 autoinhibition., Tran NH, Frost JA., J Biol Chem., 12551923, 2003, 3, 28                                                                                                                  |
| GENERIC_K_RAF1     | Positive and negative regulation of Raf kinase activity and function by phosphorylation., Chong H, Lee J, Guan KL., EMBO J., 11447113, 2001, 7, 16                                                                                                                   |
| GENERIC_K_RAF1     | Untying the regulation of the Raf-1 kinase., Dhillon AS, Kolch W., Arch Biochem Biophys., 12127063, 2002, 8, 1                                                                                                                                                       |
| GENERIC_PP_DEPH    | Structure and regulation of MAPK phosphatases., Farooq A, Zhou MM., Cell Signal., 15115656, 2004, 7                                                                                                                                                                  |
| GP91_P22PHOX_BIN D | Phagocyte NADPH oxidase: a multicomponent enzyme essential for host defenses., El-Benna J, Dang PM, Gougerot-Pocidallo MA, Elbim C., Arch Immunol Ther Exp (Warsz.), 15995580, 2005, 6                                                                               |
| GP91_P22PHOX_BIN D | Rac binding to p67(phox). Structural basis for interactions of the Rac1 effector region and insert region with components of the respiratory burst oxidase., Nisimoto Y, Freeman JL, Motalebi SA, Hirshberg M, Lambeth JD., J Biol Chem., 9228059, 1997, 7, 25       |
| GP91_P22PHOX_BIN D | Rho GTPases and their effector proteins., Bishop AL, Hall A., Biochem J., 10816416, 2000, 6, 1                                                                                                                                                                       |
| GSK3B_NFKB         | Phosphorylation of serine 468 by GSK-3beta negatively regulates basal p65 NF-kappaB activity., Buss H, Dörrie A, Schmitz ML, Frank R, Livingstone M, Resch K, Kracht M., J Biol Chem., 15465828, 2004, 11, 26                                                        |
| GSK3B_NFKB         | Post-translational modifications regulating the activity and function of the nuclear factor kappa B pathway., Perkins ND., Oncogene., 17072324, 2006, 10, 30                                                                                                         |
| GSK3B_NFKB_P3K     | Phosphorylation of serine 468 by GSK-3beta negatively regulates basal p65 NF-kappaB activity., Buss H, Dörrie A, Schmitz ML, Frank R, Livingstone M, Resch K, Kracht M., J Biol Chem., 15465828, 2004, 11, 26                                                        |
| GSK3B_NFKB_P3K     | Post-translational modifications regulating the activity and function of the nuclear factor kappa B pathway., Perkins ND., Oncogene., 17072324, 2006, 10, 30                                                                                                         |
| HNRNPA1_DEPH       | Regulation of in vitro nucleic acid strand annealing activity of heterogeneous nuclear ribonucleoprotein protein A1 by reversible phosphorylation., Idriss H, Kumar A, Casas-Finet JR, Guo H, Damuni Z, Wilson SH., Biochemistry., 7727389, 1994, 9, 20              |
| IKBA_DEGR          | Missing pieces in the NF-kappaB puzzle., Ghosh S, Karin M., Cell., 11983155, 2002, 4                                                                                                                                                                                 |
| IKBA_DEGR2         | Missing pieces in the NF-kappaB puzzle., Ghosh S, Karin M., Cell., 11983155, 2002, 4                                                                                                                                                                                 |
| IKBA_TRAN          | Distinct functional properties of IkappaB alpha and IkappaB beta., Tran K, Merika M, Thanos D., Mol Cell Biol., 9271416, 1997, 9                                                                                                                                     |
| IKBA_TRAN          | Nuclear localization of I kappa B alpha promotes active transport of NF-kappa B from the nucleus to the cytoplasm., Arenzana-Seisdedos F, Turpin P, Rodriguez M, Thomas D, Hay RT, Virelizier JL, Dargemont C., J Cell Sci., 9057089, 1997, 2                        |
| IKBA_UBIQ          | Inducible degradation of IkappaBalpha by the proteasome requires interaction with the F-box protein h-betaTrCP., Kroll M, Margottin F, Kohl A, Renard P, Durand H, Concordet JP, Bachelier F, Arenzana-Seisdedos F, Benarous R., J Biol Chem., 10075690, 1999, 3, 19 |
| IKBA_UBIQ          | Signal-induced ubiquitination of IkappaBalpha by the F-box protein Slimb/beta-TrCP., Spencer E, Jiang J, Chen ZJ., Genes Dev., 9990853, 1999, 2, 1                                                                                                                   |

|            |                                                                                                                                                                                                                                                                           |
|------------|---------------------------------------------------------------------------------------------------------------------------------------------------------------------------------------------------------------------------------------------------------------------------|
| IKBA_UBIQ  | Signaling to NF-kappaB.,Hayden MS, Ghosh S.,Genes Dev.,15371334,2004,9,15                                                                                                                                                                                                 |
| IKBA_UBIQ  | beta-TrCP mediates the signal-induced ubiquitination of IkappaBbeta.,Wu C, Ghosh S.,J Biol Chem.,10514424,1999,10,15                                                                                                                                                      |
| IKBA_UBIQ2 | Inhibition of NF-kappa-B cellular function via specific targeting of the I-kappa-B-ubiquitin ligase.,Yaron A, Gonen H, Alkalay I, Hatzubai A, Jung S, Beyth S, Mercurio F, Manning AM, Ciechanover A, Ben-Neriah Y.,EMBO J.,9351830,1998,11,3                             |
| IKBA_UBIQ3 | Inhibition of NF-kappa-B cellular function via specific targeting of the I-kappa-B-ubiquitin ligase.,Yaron A, Gonen H, Alkalay I, Hatzubai A, Jung S, Beyth S, Mercurio F, Manning AM, Ciechanover A, Ben-Neriah Y.,EMBO J.,9351830,1998,11,3                             |
| IKBA_UBIQ3 | Missing pieces in the NF-kappaB puzzle.,Ghosh S, Karin M.,Cell.,11983155,2002,4                                                                                                                                                                                           |
| IKBA_UBIQ4 | Impaired degradation of inhibitory subunit of NF-kappa B (I kappa B) and beta-catenin as a result of targeted disruption of the beta-TrCP1 gene.,Nakayama K, Hatakeyama S, Maruyama S, Kikuchi A, Onoé K, Good RA, Nakayama KI.,Proc Natl Acad Sci USA,12843402,2003,7,22 |
| IKBA_UBIQ4 | Missing pieces in the NF-kappaB puzzle.,Ghosh S, Karin M.,Cell.,11983155,2002,4                                                                                                                                                                                           |
| IKBB_DEGR  | Missing pieces in the NF-kappaB puzzle.,Ghosh S, Karin M.,Cell.,11983155,2002,4                                                                                                                                                                                           |
| IKBB_DEGR2 | Missing pieces in the NF-kappaB puzzle.,Ghosh S, Karin M.,Cell.,11983155,2002,4                                                                                                                                                                                           |
| IKBB_TRAN  | Basal phosphorylation of the PEST domain in the I(kappa)B(beta) regulates its functional interaction with the c-rel proto-oncogene product.,Chu ZL, McKinsey TA, Liu L, Qi X, Ballard DW.,Mol Cell Biol.,8887627,1996,9                                                   |
| IKBB_TRAN  | Distinct functional properties of IkappaB alpha and IkappaB beta.,Tran K, Merika M, Thanos D.,Mol Cell Biol.,9271416,1997,9                                                                                                                                               |
| IKBB_UBIQ  | Inducible degradation of IkappaBalpha by the proteasome requires interaction with the F-box protein h-betaTrCP.,Kroll M, Margottin F, Kohl A, Renard P, Durand H, Concordet JP, Bachelerie F, Arenzana-Seisdedos F, Benarous R.,J Biol Chem.,10075690,1999,3,19           |
| IKBB_UBIQ  | Signal-induced ubiquitination of IkappaBalpha by the F-box protein Slimb/beta-TrCP.,Spencer E, Jiang J, Chen ZJ.,Genes Dev.,9990853,1999,2,1                                                                                                                              |
| IKBB_UBIQ  | Signaling to NF-kappaB.,Hayden MS, Ghosh S.,Genes Dev.,15371334,2004,9,15                                                                                                                                                                                                 |
| IKBB_UBIQ  | beta-TrCP mediates the signal-induced ubiquitination of IkappaBbeta.,Wu C, Ghosh S.,J Biol Chem.,10514424,1999,10,15                                                                                                                                                      |
| IKKE_IRF3  | A20 is a negative regulator of IFN regulatory factor 3 signaling.,Saitoh T, Yamamoto M, Miyagishi M, Taira K, Nakanishi M, Fujita T, Akira S, Yamamoto N, Yamaoka S.,J Immunol.,15661910,2005,2,1                                                                         |
| IKKE_IRF3  | IKKepsilon and TBK1 are essential components of the IRF3 signaling pathway.,Fitzgerald KA, McWhirter SM, Faia KL, Rowe DC, Latz E, Golenbock DT, Coyle AJ, Liao SM, Maniatis T.,Nat Immunol.,12692549,2003,5                                                              |
| IKKE_IRF3  | Identification of Ser-386 of interferon regulatory factor 3 as critical target for inducible phosphorylation that determines activation.,Mori M, Yoneyama M, Ito T, Takahashi K, Inagaki F, Fujita T.,J Biol Chem.,14703513,2004,3,12                                     |
| IKKE_IRF3  | Structural and functional analysis of interferon regulatory factor 3: localization of the transactivation and autoinhibitory domains.,Lin R, Mamane Y, Hiscott J.,Mol Cell Biol.,10082512,1999,4                                                                          |
| IKKE_NFKB  | Inducible phosphorylation of NF-kappa B p65 at serine 468 by T cell costimulation is mediated by IKK epsilon.,Mattoli I, Geng H, Sebald A, Hodel M, Bucher C, Kracht M, Schmitz ML.,J Biol Chem.,16407239,2006,3,10                                                       |

|                       |                                                                                                                                                                                                                                                                                |
|-----------------------|--------------------------------------------------------------------------------------------------------------------------------------------------------------------------------------------------------------------------------------------------------------------------------|
| IKKE_NFKB             | Post-translational modifications regulating the activity and function of the nuclear factor kappa B pathway.,Perkins ND.,Oncogene.,17072324,2006,10,30                                                                                                                         |
| IKKE_NFKB2            | Post-translational modifications regulating the activity and function of the nuclear factor kappa B pathway.,Perkins ND.,Oncogene.,17072324,2006,10,30                                                                                                                         |
| IKKE_NFKB2            | TOO LONG: See PubMed ID,Buss H, Dörrie A, Schmitz ML, Hoffmann E, Resch K, Kracht M.,J Biol Chem.,15489227,2004,12,31                                                                                                                                                          |
| IKKE_NFKB_P3K         | Inducible phosphorylation of NF-kappa B p65 at serine 468 by T cell costimulation is mediated by IKK epsilon.,Mattioli I, Geng H, Sebald A, Hodel M, Bucher C, Kracht M, Schmitz ML.,J Biol Chem.,16407239,2006,3,10                                                           |
| IKKE_NFKB_P3K         | Post-translational modifications regulating the activity and function of the nuclear factor kappa B pathway.,Perkins ND.,Oncogene.,17072324,2006,10,30                                                                                                                         |
| IKKE_NFKB_P5K         | Post-translational modifications regulating the activity and function of the nuclear factor kappa B pathway.,Perkins ND.,Oncogene.,17072324,2006,10,30                                                                                                                         |
| IKKE_NFKB_P5K         | TOO LONG: See PubMed ID,Buss H, Dörrie A, Schmitz ML, Hoffmann E, Resch K, Kracht M.,J Biol Chem.,15489227,2004,12,31                                                                                                                                                          |
| IKKE_PHOS             | TOO LONG: See pubmed ID,Sato S, Sugiyama M, Yamamoto M, Watanabe Y, Kawai T, Takeda K, Akira S.,J Immunol.,14530355,2003,10,15                                                                                                                                                 |
| IKKE_PHOS             | Triggering the interferon antiviral response through an IKK-related pathway.,Sharma S, tenOever BR, Grandvaux N, Zhou GP, Lin R, Hiscott J.,Science.,12702806,2003,5,16                                                                                                        |
| IKK_6PHOS             | Positive and negative regulation of IkappaB kinase activity through IKKbeta subunit phosphorylation.,Delhase M, Hayakawa M, Chen Y, Karin M.,Science.,10195894,1999,4,9                                                                                                        |
| IKK_IKBA              | IKKalpha limits macrophage NF-kappaB activation and contributes to the resolution of inflammation.,Lawrence T, Bebiem M, Liu GY, Nizet V, Karin M.,Nature.,15858576,2005,4,28                                                                                                  |
| IKK_IKBA              | Signaling to NF-kappaB.,Hayden MS, Ghosh S.,Genes Dev.,15371334,2004,9,15                                                                                                                                                                                                      |
| IKK_IKBA              | TRAIL-R as a negative regulator of innate immune cell responses.,Diehl GE, Yue HH, Hsieh K, Kuang AA, Ho M, Morici LA, Lenz LL, Cado D, Riley LW, Winoto A.,Immunity.,15589175,2004,12                                                                                         |
| IKK_IKBB              | IKKalpha limits macrophage NF-kappaB activation and contributes to the resolution of inflammation.,Lawrence T, Bebiem M, Liu GY, Nizet V, Karin M.,Nature.,15858576,2005,4,28                                                                                                  |
| IKK_IKBB              | Signaling to NF-kappaB.,Hayden MS, Ghosh S.,Genes Dev.,15371334,2004,9,15                                                                                                                                                                                                      |
| IKK_IKBB              | TRAIL-R as a negative regulator of innate immune cell responses.,Diehl GE, Yue HH, Hsieh K, Kuang AA, Ho M, Morici LA, Lenz LL, Cado D, Riley LW, Winoto A.,Immunity.,15589175,2004,12                                                                                         |
| IKK_MAP3K8            | Phosphorylation at Thr-290 regulates Tpl2 binding to NF-kappaB1/p105 and Tpl2 activation and degradation by lipopolysaccharide.,Cho J, Tschlis PN.,Proc Natl Acad Sci USA,15699325,2005,2,15                                                                                   |
| IKK_MAP3K8            | Tpl2 (tumor progression locus 2) phosphorylation at Thr290 is induced by lipopolysaccharide via an Ikappa-B Kinase-beta-dependent pathway and is required for Tpl2 activation by external signals.,Cho J, Melnick M, Solidakis GP, Tschlis PN.,J Biol Chem.,15778223,2005,5,27 |
| IKK_MAP3K8(p52)_NF KB | IkappaB kinase is an essential component of the Tpl2 signaling pathway.,Waterfield M, Jin W, Reiley W, Zhang M, Sun SC.,Mol Cell Biol.,15199157,2004,7                                                                                                                         |
| IKK_MAP3K8(p52)_NF KB | Tpl2 (tumor progression locus 2) phosphorylation at Thr290 is induced by lipopolysaccharide via an Ikappa-B Kinase-beta-dependent pathway and is required for Tpl2 activation by external signals.,Cho J, Melnick M, Solidakis GP, Tschlis PN.,J Biol Chem.,15778223,2005,5,27 |
| IKK_NFKB              | IKKbeta phosphorylates p65 at S468 in transactivation domain 2.,Schwabe RF, Sakurai H.,FASEB J.,16046471,2005,10                                                                                                                                                               |

|                    |                                                                                                                                                                                                                                            |
|--------------------|--------------------------------------------------------------------------------------------------------------------------------------------------------------------------------------------------------------------------------------------|
| IKK_NFKB           | Post-translational modifications regulating the activity and function of the nuclear factor kappa B pathway.,Perkins ND.,Oncogene.,17072324,2006,10,30                                                                                     |
| IKK_NFKB(p105)     | Direct phosphorylation of NF-kappaB1 p105 by the IkappaB kinase complex on serine 927 is essential for signal-induced p105 proteolysis.,Salmerón A, Janzen J, Soneji Y, Bump N, Kamens J, Allen H, Ley SC.,J Biol Chem.,11297557,2001,6,22 |
| IKK_NFKB(p105)     | Shared pathways of IkappaB kinase-induced SCF(betaTrCP)-mediated ubiquitination and degradation for the NF-kappaB precursor p105 and IkappaBalpha.,Heissmeyer V, Krappmann D, Hatada EN, Scheidereit C.,Mol Cell Biol.,11158290,2001,2     |
| IKK_NFKB(p105)     | Signaling to NF-kappaB.,Hayden MS, Ghosh S.,Genes Dev.,15371334,2004,9,15                                                                                                                                                                  |
| IKK_NFKB2          | IKKbeta phosphorylates p65 at S468 in transactivation domain 2.,Schwabe RF, Sakurai H. ,FASEB J.,16046471,2005,10                                                                                                                          |
| IKK_NFKB2          | Post-translational modifications regulating the activity and function of the nuclear factor kappa B pathway.,Perkins ND.,Oncogene.,17072324,2006,10,30                                                                                     |
| IKK_NFKB3          | IKKbeta phosphorylates p65 at S468 in transactivation domain 2.,Schwabe RF, Sakurai H. ,FASEB J.,16046471,2005,10                                                                                                                          |
| IKK_NFKB3          | Post-translational modifications regulating the activity and function of the nuclear factor kappa B pathway.,Perkins ND.,Oncogene.,17072324,2006,10,30                                                                                     |
| IKK_NFKB_P3K       | IKKbeta phosphorylates p65 at S468 in transactivation domain 2.,Schwabe RF, Sakurai H. ,FASEB J.,16046471,2005,10                                                                                                                          |
| IKK_NFKB_P3K       | Post-translational modifications regulating the activity and function of the nuclear factor kappa B pathway.,Perkins ND.,Oncogene.,17072324,2006,10,30                                                                                     |
| IKK_NFKB_P5K       | IKKbeta phosphorylates p65 at S468 in transactivation domain 2.,Schwabe RF, Sakurai H. ,FASEB J.,16046471,2005,10                                                                                                                          |
| IKK_NFKB_P5K       | Post-translational modifications regulating the activity and function of the nuclear factor kappa B pathway.,Perkins ND.,Oncogene.,17072324,2006,10,30                                                                                     |
| IKK_NFKB_P5K2      | IKKbeta phosphorylates p65 at S468 in transactivation domain 2.,Schwabe RF, Sakurai H. ,FASEB J.,16046471,2005,10                                                                                                                          |
| IKK_NFKB_P5K2      | Post-translational modifications regulating the activity and function of the nuclear factor kappa B pathway.,Perkins ND.,Oncogene.,17072324,2006,10,30                                                                                     |
| IKK_PKR_BIND       | Missing pieces in the NF-kappaB puzzle.,Ghosh S, Karin M.,Cell.,11983155,2002,4                                                                                                                                                            |
| IKK_PKR_BIND       | PKR stimulates NF-kappaB irrespective of its kinase function by interacting with the IkappaB kinase complex.,Bonnet MC, Weil R, Dam E, Hovanessian AG, Meurs EF.,Mol Cell Biol.,10848580,2000,7                                            |
| IKK_PKR_BIND       | The N-terminus of PKR is responsible for the activation of the NF-kappaB signaling pathway by interacting with the IKK complex.,Bonnet MC, Daurat C, Ottone C, Meurs EF.,Cell Signal.,16600570,2006,9                                      |
| IKK_PKR_PHOS       | Missing pieces in the NF-kappaB puzzle.,Ghosh S, Karin M.,Cell.,11983155,2002,4                                                                                                                                                            |
| IKK_PKR_PHOS       | PKR stimulates NF-kappaB irrespective of its kinase function by interacting with the IkappaB kinase complex.,Bonnet MC, Weil R, Dam E, Hovanessian AG, Meurs EF.,Mol Cell Biol.,10848580,2000,7                                            |
| IKK_PKR_PHOS       | The N-terminus of PKR is responsible for the activation of the NF-kappaB signaling pathway by interacting with the IKK complex.,Bonnet MC, Daurat C, Ottone C, Meurs EF.,Cell Signal.,16600570,2006,9                                      |
| IKK_PKR_TRAF6_BIND | Missing pieces in the NF-kappaB puzzle.,Ghosh S, Karin M.,Cell.,11983155,2002,4                                                                                                                                                            |
| IKK_PKR_TRAF6_BIND | PKR stimulates NF-kappaB irrespective of its kinase function by interacting with the IkappaB kinase complex.,Bonnet MC, Weil R, Dam E, Hovanessian AG, Meurs EF.,Mol Cell Biol.,10848580,2000,7                                            |



|                               |                                                                                                                                                                                                                                                                        |
|-------------------------------|------------------------------------------------------------------------------------------------------------------------------------------------------------------------------------------------------------------------------------------------------------------------|
| IKK_PKR_TRAF6_BIN<br>D        | The N-terminus of PKR is responsible for the activation of the NF-kappaB signaling pathway by interacting with the IKK complex.,Bonnet MC, Daurat C, Ottone C, Meurs EF.,Cell Signal.,16600570,2006,9                                                                  |
| IKK_PKR_TRAF6_PH<br>OS        | Missing pieces in the NF-kappaB puzzle.,Ghosh S, Karin M.,Cell.,11983155,2002,4                                                                                                                                                                                        |
| IKK_PKR_TRAF6_PH<br>OS        | PKR stimulates NF-kappaB irrespective of its kinase function by interacting with the IkappaB kinase complex.,Bonnet MC, Weil R, Dam E, Hovanessian AG, Meurs EF.,Mol Cell Biol.,10848580,2000,7                                                                        |
| IKK_PKR_TRAF6_PH<br>OS        | The N-terminus of PKR is responsible for the activation of the NF-kappaB signaling pathway by interacting with the IKK complex.,Bonnet MC, Daurat C, Ottone C, Meurs EF.,Cell Signal.,16600570,2006,9                                                                  |
| IKK_RIP1_TICAM1P_<br>BIND     | TOO LONG: See pubmed ID,Sato S, Sugiyama M, Yamamoto M, Watanabe Y, Kawai T, Takeda K, Akira S.,J Immunol.,14530355,2003,10,15                                                                                                                                         |
| IKK_RIP1_TICAM1P_<br>PHOS     | TOO LONG: See pubmed ID,Sato S, Sugiyama M, Yamamoto M, Watanabe Y, Kawai T, Takeda K, Akira S.,J Immunol.,14530355,2003,10,15                                                                                                                                         |
| IKK_RIP2_NOD1P_BI<br>ND       | CARD4/Nod1 mediates NF-kappaB and JNK activation by invasive Shigella flexneri.,Girardin SE, Tournebize R, Mavris M, Page AL, Li X, Stark GR, Bertin J, DiStefano PS, Yaniv M, Sansonetti PJ, Philpott DJ.,EMBO Rep.,11463746,2001,8                                   |
| IKK_RIP2_NOD1P_PH<br>OS       | CARD4/Nod1 mediates NF-kappaB and JNK activation by invasive Shigella flexneri.,Girardin SE, Tournebize R, Mavris M, Page AL, Li X, Stark GR, Bertin J, DiStefano PS, Yaniv M, Sansonetti PJ, Philpott DJ.,EMBO Rep.,11463746,2001,8                                   |
| IKK_RIP2_NOD2P_BI<br>ND       | Nod2, a Nod1/Apaf-1 family member that is restricted to monocytes and activates NF-kappaB.,Ogura Y, Inohara N, Benito A, Chen FF, Yamaoka S, Nunez G.,J Biol Chem.,11087742,2001,2,16                                                                                  |
| IKK_RIP2_NOD2P_PH<br>OS       | Nod2, a Nod1/Apaf-1 family member that is restricted to monocytes and activates NF-kappaB.,Ogura Y, Inohara N, Benito A, Chen FF, Yamaoka S, Nunez G.,J Biol Chem.,11087742,2001,2,16                                                                                  |
| IKK_RIP2_TRIP6_TR<br>AF2_BIND | TRIP6 is a RIP2-associated common signaling component of multiple NF-kappaB activation pathways.,Li L, Bin LH, Li F, Liu Y, Chen D, Zhai Z, Shu HB.,J Cell Sci.,15657077,2005,2,1                                                                                      |
| IKK_RIP2_TRIP6_TR<br>AF2_PHOS | TRIP6 is a RIP2-associated common signaling component of multiple NF-kappaB activation pathways.,Li L, Bin LH, Li F, Liu Y, Chen D, Zhai Z, Shu HB.,J Cell Sci.,15657077,2005,2,1                                                                                      |
| IKK_SRC_BIND                  | Functional role of c-Src in IL-1-induced NF-kappa B activation: c-Src is a component of the IKK complex.,Funakoshi-Tago M, Tago K, Andoh K, Sonoda Y, Tominaga S, Kasahara T.,J Biochem (Tokyo).,15749833,2005,2                                                       |
| IL1/L/AP_PHOS                 | Phosphatidylinositol 3-kinase is recruited to a specific site in the activated IL-1 receptor I.,Marmioli S, Bavelloni A, Faenza I, Sirri A, Ognibene A, Cenni V, Tsukada J, Koyama Y, Ruzzene M, Ferri A, Auron PE, Toker A, Maraldi NM.,FEBS Lett.,9821957,1998,10,30 |
| IL1/L_IL1RAP_BIND             | Molecular cloning and characterization of a second subunit of the interleukin 1 receptor complex.,Greenfeder SA, Nunes P, Kwee L, Labow M, Chizzonite RA, Ju G.,J Biol Chem.,7775431,1995,6,9                                                                          |
| IL1A_TRAN                     | Differential sensitivity of interleukin-1 alpha and -beta precursor proteins to cleavage by calpain, a calcium-dependent protease.,Kavita U, Mizel SB.,J Biol Chem.,7499244,1995,11,17                                                                                 |
| IL1B_TRAN                     | Differential sensitivity of interleukin-1 alpha and -beta precursor proteins to cleavage by calpain, a calcium-dependent protease.,Kavita U, Mizel SB.,J Biol Chem.,7499244,1995,11,17                                                                                 |
| IL1R1_BIND                    | Decoy receptors: a strategy to regulate inflammatory cytokines and chemokines.,Mantovani A, Locati M, Vecchi A, Sozzani S, Allavena P.,Trends Immunol.,11377293,2001,6                                                                                                 |

|                          |                                                                                                                                                                                                                                                                                 |
|--------------------------|---------------------------------------------------------------------------------------------------------------------------------------------------------------------------------------------------------------------------------------------------------------------------------|
| IL1R1_BIND               | Soluble type II interleukin 1 (IL-1) receptor binds and blocks processing of IL-1 beta precursor and loses affinity for IL-1 receptor antagonist.,Symons JA, Young PR, Duff GW., <i>Proc Natl Acad Sci USA</i> ,7878046,1995,2,28                                               |
| IL1R1_BIND               | The membrane form of the type II IL-1 receptor accounts for inhibitory function.,Neumann D, Kollewe C, Martin MU, Boraschi D., <i>J Immunol.</i> ,10975853,2000,9,15                                                                                                            |
| IL1R1_BIND               | The type II 'decoy' receptor: a novel regulatory pathway for interleukin 1.,Colotta F, Dower SK, Sims JE, Mantovani A., <i>Immunol Today.</i> ,7848516,1994,12                                                                                                                  |
| IL1R1_PI3K1A             | Phosphatidylinositol 3-kinase is recruited to a specific site in the activated IL-1 receptor I.,Marmioli S, Bavelloni A, Faenza I, Sirri A, Ognibene A, Cenni V, Tsukada J, Koyama Y, Ruzzene M, Ferri A, Auron PE, Toker A, Maraldi NM., <i>FEBS Lett.</i> ,9821957,1998,10,30 |
| IL1R1_PI3K1A             | The IL-1 receptor accessory protein is essential for PI 3-kinase recruitment and activation.,Reddy SA, Lin YF, Huang HJ, Samanta AK, Liao WS., <i>Biochem Biophys Res Commun.</i> ,15044087,2004,4,16                                                                           |
| IL1R2_IL1RAP_BIND        | Decoy receptors: a strategy to regulate inflammatory cytokines and chemokines.,Mantovani A, Locati M, Vecchi A, Sozzani S, Allavena P., <i>Trends Immunol.</i> ,11377293,2001,6                                                                                                 |
| IL1R2_IL1RAP_BIND        | The type II IL-1 receptor interacts with the IL-1 receptor accessory protein: a novel mechanism of regulation of IL-1 responsiveness.,Lang D, Knop J, Wesche H, Raffetseder U, Kurrle R, Boraschi D, Martin MU., <i>J Immunol.</i> ,9862719,1998,12,15                          |
| IMPA3_TRAN               | NF- $\kappa$ B is transported into the nucleus by importin $\alpha$ 3 and importin $\alpha$ 4.,Fagerlund R, Kinnunen L, Köhler M, Julkunen I, Melén K., <i>J Biol Chem.</i> ,15677444,2005,4,22                                                                                 |
| IP3R_mi145p_BIND         | Inositol 1,4,5-trisphosphate receptors as signal integrators.,Patterson RL, Boehning D, Snyder SH., <i>Annu Rev Biochem.</i> ,15189149,2004                                                                                                                                     |
| IRAK1C_TOLLIP_BIND       | A novel splice variant of interleukin-1 receptor (IL-1R)-associated kinase 1 plays a negative regulatory role in Toll/IL-1R-induced inflammatory signaling.,Rao N, Nguyen S, Ngo K, Fung-Leung WP., <i>Mol Cell Biol.</i> ,16024789,2005,8                                      |
| IRAK1_DEGR               | Interleukin-1 (IL-1) receptor-associated kinase-dependent IL-1-induced signaling complexes phosphorylate TAK1 and TAB2 at the plasma membrane and activate TAK1 in the cytosol.,Jiang Z, Ninomiya-Tsuji J, Qian Y, Matsumoto K, Li X., <i>Mol Cell Biol.</i> ,12242293,2002,10  |
| IRAK1_ECSIT_BIND         | ECSIT is an evolutionarily conserved intermediate in the Toll/IL-1 signal transduction pathway.,Kopp E, Medzhitov R, Carothers J, Xiao C, Douglas I, Janeway CA, Ghosh S., <i>Genes Dev.</i> ,10465784,1999,8,15                                                                |
| IRAK1_ECSIT_FMAP3K1_BIND | ECSIT is an evolutionarily conserved intermediate in the Toll/IL-1 signal transduction pathway.,Kopp E, Medzhitov R, Carothers J, Xiao C, Douglas I, Janeway CA, Ghosh S., <i>Genes Dev.</i> ,10465784,1999,8,15                                                                |
| IRAK1_ECSIT_FMAP3K1_BIND | Fas-induced proteolytic activation and intracellular redistribution of the stress-signaling kinase MEKK1.,Deak JC, Cross JV, Lewis M, Qian Y, Parrott LA, Distelhorst CW, Templeton DJ., <i>Proc Natl Acad Sci USA.</i> ,9576928,1998,5,12                                      |
| IRAK1_MAP3K3_BIND        | Differential regulation of interleukin 1 receptor and Toll-like receptor signaling by MEKK3.,Huang Q, Yang J, Lin Y, Walker C, Cheng J, Liu ZG, Su B., <i>Nat Immunol.</i> ,14661019,2004,1                                                                                     |
| IRAK1_MAP3K5_BIND        | ROS-dependent activation of the TRAF6-ASK1-p38 pathway is selectively required for TLR4-mediated innate immunity.,Matsuzawa A, Saegusa K, Noguchi T, Sadamitsu C, Nishitoh H, Nagai S, Koyasu S, Matsumoto K, Takeda K, Ichijo H., <i>Nat Immunol.</i> ,15864310,2005,6         |
| IRAK1_MAP3K7_4PHOS       | Interleukin-1 (IL-1) receptor-associated kinase-dependent IL-1-induced signaling complexes phosphorylate TAK1 and TAB2 at the plasma membrane and activate TAK1 in the cytosol.,Jiang Z, Ninomiya-Tsuji J, Qian Y, Matsumoto K, Li X., <i>Mol Cell Biol.</i> ,12242293,2002,10  |

|                      |                                                                                                                                                                                                                                                                          |
|----------------------|--------------------------------------------------------------------------------------------------------------------------------------------------------------------------------------------------------------------------------------------------------------------------|
| IRAK1_MAP3K7_BIND    | Interleukin-1 (IL-1) receptor-associated kinase-dependent IL-1-induced signaling complexes phosphorylate TAK1 and TAB2 at the plasma membrane and activate TAK1 in the cytosol.,Jiang Z, Ninomiya-Tsuji J, Qian Y, Matsumoto K, Li X.,Mol Cell Biol.,12242293,2002,10    |
| IRAK1_MAP3K7_BIND    | TAB2 and TAB3 activate the NF-kappaB pathway through binding to polyubiquitin chains.,Kanayama A, Seth RB, Sun L, Ea CK, Hong M, Shaito A, Chiu YH, Deng L, Chen ZJ.,Mol Cell.,15327770,2004,8,27                                                                        |
| IRAK1_MAP3K7 DISS    | Interleukin-1 (IL-1) receptor-associated kinase-dependent IL-1-induced signaling complexes phosphorylate TAK1 and TAB2 at the plasma membrane and activate TAK1 in the cytosol.,Jiang Z, Ninomiya-Tsuji J, Qian Y, Matsumoto K, Li X.,Mol Cell Biol.,12242293,2002,10    |
| IRAK1_PLNO3_BIND     | Pellino3 is a novel upstream regulator of p38 MAPK and activates CREB in a p38-dependent manner.,Butler MP, Hanly JA, Moynagh PN.,J Biol Chem.,15917247,2005,7,29                                                                                                        |
| IRAK1_TIFA_3UBIQ     | Activation of the IkappaB kinase complex by TRAF6 requires a dimeric ubiquitin-conjugating enzyme complex and a unique polyubiquitin chain.,Deng L, Wang C, Spencer E, Yang L, Braun A, You J, Slaughter C, Pickart C, Chen ZJ.,Cell,11057907,2000,10,13                 |
| IRAK1_TIFA_A20_BIND  | The ubiquitin-modifying enzyme A20 is required for termination of Toll-like receptor responses.,Boone DL, Turer EE, Lee EG, Ahmad RC, Wheeler MT, Tsui C, Hurley P, Chien M, Chai S, Hitotsumatsu O, McNally E, Pickart C, Ma A.,Nat Immunol.,15334086,2004,10           |
| IRAK1_TIFA_CYLD_BIND | TAB2 and TAB3 activate the NF-kappaB pathway through binding to polyubiquitin chains.,Kanayama A, Seth RB, Sun L, Ea CK, Hong M, Shaito A, Chiu YH, Deng L, Chen ZJ.,Mol Cell.,15327770,2004,8,27                                                                        |
| IRAK1_TIFA_DEBQ      | TAB2 and TAB3 activate the NF-kappaB pathway through binding to polyubiquitin chains.,Kanayama A, Seth RB, Sun L, Ea CK, Hong M, Shaito A, Chiu YH, Deng L, Chen ZJ.,Mol Cell.,15327770,2004,8,27                                                                        |
| IRAK1_TIFA_DEBQ2     | The ubiquitin-modifying enzyme A20 is required for termination of Toll-like receptor responses.,Boone DL, Turer EE, Lee EG, Ahmad RC, Wheeler MT, Tsui C, Hurley P, Chien M, Chai S, Hitotsumatsu O, McNally E, Pickart C, Ma A.,Nat Immunol.,15334086,2004,10           |
| IRAK1_TOLLIP_BIND    | Negative regulation of toll-like receptor-mediated signaling by Tollip.,Zhang G, Ghosh S.,J Biol Chem.,11751856,2002,3,1                                                                                                                                                 |
| IRAK1_TOLLIP_BIND    | Tollip, a new component of the IL-1RI pathway, links IRAK to the IL-1 receptor.,Burns K, Clatworthy J, Martin L, Martinon F, Plumpton C, Maschera B, Lewis A, Ray K, Tschopp J, Volpe F.,Nat Cell Biol.,10854325,2000,6                                                  |
| IRAK_MYD_TIR_2PHOS   | Sequential autophosphorylation steps in the interleukin-1 receptor-associated kinase-1 regulate its availability as an adapter in interleukin-1 signaling.,Kollewe C, Mackensen AC, Neumann D, Knop J, Cao P, Li S, Wesche H, Martin MU.,J Biol Chem.,14625308,2004,2,13 |
| IRAK_MYD_TIR_BIND    | IRAK-4: a novel member of the IRAK family with the properties of an IRAK-kinase.,Li S, Strelow A, Fontana EJ, Wesche H.,Proc Natl Acad Sci USA,11960013,2002,4,16                                                                                                        |
| IRAK_MYD_TIR_BIND    | MyD88: an adapter that recruits IRAK to the IL-1 receptor complex.,Wesche H, Henzel WJ, Shillinglaw W, Li S, Cao Z.,Immunity,9430229,1997,12                                                                                                                             |
| IRAK_MYD_TIR_PHOS    | IRAK-4: a novel member of the IRAK family with the properties of an IRAK-kinase.,Li S, Strelow A, Fontana EJ, Wesche H.,Proc Natl Acad Sci USA,11960013,2002,4,16                                                                                                        |
| IRAK_MYD_TIR_PHOS    | Inhibition of interleukin 1 receptor/Toll-like receptor signaling through the alternatively spliced, short form of MyD88 is due to its failure to recruit IRAK-4.,Burns K, Janssens S, Brissoni B, Olivos N, Beyaert R, Tschopp J.,J Exp Med.,12538665,2003,1,20         |

|                            |                                                                                                                                                                                                                                                                                                                                                              |
|----------------------------|--------------------------------------------------------------------------------------------------------------------------------------------------------------------------------------------------------------------------------------------------------------------------------------------------------------------------------------------------------------|
| IRAK_MYD_TIR_PHO<br>S      | Regulation of interleukin-1- and lipopolysaccharide-induced NF-kappaB activation by alternative splicing of MyD88.,Janssens S, Burns K, Tschopp J, Beyaert R.,Curr Biol.,11909531,2002,3,19                                                                                                                                                                  |
| IRAK_MYD_TIR_PHO<br>S      | Sequential autophosphorylation steps in the interleukin-1 receptor-associated kinase-1 regulate its availability as an adapter in interleukin-1 signaling.,Kollewe C, Mackensen AC, Neumann D, Knop J, Cao P, Li S, Wesche H, Martin MU.,J Biol Chem.,14625308,2004,2,13                                                                                     |
| IRAK_TOLLIP_TRAF6<br>_BIND | A novel splice variant of interleukin-1 receptor (IL-1R)-associated kinase 1 plays a negative regulatory role in Toll/IL-1R-induced inflammatory signaling.,Rao N, Nguyen S, Ngo K, Fung-Leung WP.,Mol Cell Biol.,16024789,2005,8                                                                                                                            |
| IRAK_TRAF6_BIND            | Activation of the IkappaB kinase complex by TRAF6 requires a dimeric ubiquitin-conjugating enzyme complex and a unique polyubiquitin chain.,Deng L, Wang C, Spencer E, Yang L, Braun A, You J, Slaughter C, Pickart C, Chen ZJ.,Cell,11057907,2000,10,13                                                                                                     |
| IRAK_TRAF6_BIND            | Identification of TIFA as an adapter protein that links tumor necrosis factor receptor-associated factor 6 (TRAF6) to interleukin-1 (IL-1) receptor-associated kinase-1 (IRAK-1) in IL-1 receptor signaling.,Takatsuna H, Kato H, Gohda J, Akiyama T, Moriya A, Okamoto Y, Yamagata Y, Otsuka M, Umezawa K, Semba K, Inoue J.,J Biol Chem.,12566447,2003,4,4 |
| IRAK_TRAF6_BIND            | Structure and interactions of the ubiquitin-conjugating enzyme variant human Uev1a: implications for enzymatic synthesis of polyubiquitin chains.,Hau DD, Lewis MJ, Saltibus LF, Pastushok L, Xiao W, Spyrapoulos L.,Biochemistry,16893187,2006,8,15                                                                                                         |
| IRAK_TRAF6 DISS            | IRAK-M is a negative regulator of Toll-like receptor signaling.,Kobayashi K, Hernandez LD, Galán JE, Janeway CA, Medzhitov R, Flavell RA.,Cell,12150927,2002,7,26                                                                                                                                                                                            |
| IRAK_TRAF6 DISS            | IRAK-M is a novel member of the Pelle/interleukin-1 receptor-associated kinase (IRAK) family.,Wesche H, Gao X, Li X, Kirschning CJ, Stark GR, Cao Z.,J Biol Chem.,10383454,1999,7,2                                                                                                                                                                          |
| IRAK_TRAF6 DISS            | Pellino 1 is required for interleukin-1 (IL-1)-mediated signaling through its interaction with the IL-1 receptor-associated kinase 4 (IRAK4)-IRAK-tumor necrosis factor receptor-associated factor 6 (TRAF6) complex.,Jiang Z, Johnson HJ, Nie H, Qin J, Bird TA, Li X.,J Biol Chem.,12496252,2003,3,28                                                      |
| IRAK_TRAF6 DISS            | Sequential autophosphorylation steps in the interleukin-1 receptor-associated kinase-1 regulate its availability as an adapter in interleukin-1 signaling.,Kollewe C, Mackensen AC, Neumann D, Knop J, Cao P, Li S, Wesche H, Martin MU.,J Biol Chem.,14625308,2004,2,13                                                                                     |
| IRAK_TRAF6 DISS            | The murine IRAK2 gene encodes four alternatively spliced isoforms, two of which are inhibitory.,Hardy MP, O'Neill LA.,J Biol Chem.,15082713,2004,6,25                                                                                                                                                                                                        |
| IRAK_TRAF6 DISS            | Toll-like receptor signaling.,Akira S.,J Biol Chem.,12893815,2003,10,3                                                                                                                                                                                                                                                                                       |
| IRAK_TRAF6_TIRAP_<br>BIND  | Activation of the IkappaB kinase complex by TRAF6 requires a dimeric ubiquitin-conjugating enzyme complex and a unique polyubiquitin chain.,Deng L, Wang C, Spencer E, Yang L, Braun A, You J, Slaughter C, Pickart C, Chen ZJ.,Cell,11057907,2000,10,13                                                                                                     |
| IRAK_TRAF6_TIRAP_<br>BIND  | Identification of TIFA as an adapter protein that links tumor necrosis factor receptor-associated factor 6 (TRAF6) to interleukin-1 (IL-1) receptor-associated kinase-1 (IRAK-1) in IL-1 receptor signaling.,Takatsuna H, Kato H, Gohda J, Akiyama T, Moriya A, Okamoto Y, Yamagata Y, Otsuka M, Umezawa K, Semba K, Inoue J.,J Biol Chem.,12566447,2003,4,4 |
| IRAK_TRAF6_TIRAP_<br>BIND  | Structure and interactions of the ubiquitin-conjugating enzyme variant human Uev1a: implications for enzymatic synthesis of polyubiquitin chains.,Hau DD, Lewis MJ, Saltibus LF, Pastushok L, Xiao W, Spyrapoulos L.,Biochemistry,16893187,2006,8,15                                                                                                         |

|                         |                                                                                                                                                                                                                                                                                                         |
|-------------------------|---------------------------------------------------------------------------------------------------------------------------------------------------------------------------------------------------------------------------------------------------------------------------------------------------------|
| IRAK_TRAF6_TIRAP_DISS   | IRAK-M is a negative regulator of Toll-like receptor signaling.,Kobayashi K, Hernandez LD, Galán JE, Janeway CA, Medzhitov R, Flavell RA.,Cell,12150927,2002,7,26                                                                                                                                       |
| IRAK_TRAF6_TIRAP_DISS   | IRAK-M is a novel member of the Pelle/interleukin-1 receptor-associated kinase (IRAK) family.,Wesche H, Gao X, Li X, Kirschning CJ, Stark GR, Cao Z.,J Biol Chem.,10383454,1999,7,2                                                                                                                     |
| IRAK_TRAF6_TIRAP_DISS   | Pellino 1 is required for interleukin-1 (IL-1)-mediated signaling through its interaction with the IL-1 receptor-associated kinase 4 (IRAK4)-IRAK-tumor necrosis factor receptor-associated factor 6 (TRAF6) complex.,Jiang Z, Johnson HJ, Nie H, Qin J, Bird TA, Li X.,J Biol Chem.,12496252,2003,3,28 |
| IRAK_TRAF6_TIRAP_DISS   | Sequential autophosphorylation steps in the interleukin-1 receptor-associated kinase-1 regulate its availability as an adapter in interleukin-1 signaling.,Kollewe C, Mackensen AC, Neumann D, Knop J, Cao P, Li S, Wesche H, Martin MU.,J Biol Chem.,14625308,2004,2,13                                |
| IRAK_TRAF6_TIRAP_DISS   | The murine IRAK2 gene encodes four alternatively spliced isoforms, two of which are inhibitory.,Hardy MP, O'Neill LA.,J Biol Chem.,15082713,2004,6,25                                                                                                                                                   |
| IRAK_TRAF6_TIRAP_DISS   | Toll-like receptor signaling.,Akira S.,J Biol Chem.,12893815,2003,10,3                                                                                                                                                                                                                                  |
| IRF3_DIME               | Identification of Ser-386 of interferon regulatory factor 3 as critical target for inducible phosphorylation that determines activation.,Mori M, Yoneyama M, Ito T, Takahashi K, Inagaki F, Fujita T.,J Biol Chem.,14703513,2004,3,12                                                                   |
| IRF3_DIME               | Structural and functional analysis of interferon regulatory factor 3: localization of the transactivation and autoinhibitory domains.,Lin R, Mamane Y, Hiscott J.,Mol Cell Biol.,10082512,1999,4                                                                                                        |
| IRF3_ISRE_BIND          | Transcriptional activation of alpha/beta interferon genes: interference by nonsegmented negative-strand RNA viruses.,Conzelmann KK.,J Virol.,15827138,2005,5                                                                                                                                            |
| IRF3_TRAN               | Structural and functional analysis of interferon regulatory factor 3: localization of the transactivation and autoinhibitory domains.,Lin R, Mamane Y, Hiscott J.,Mol Cell Biol.,10082512,1999,4                                                                                                        |
| IRF7_ISRE_BIND          | IRF family of transcription factors as regulators of host defense.,Taniguchi T, Ogasawara K, Takaoka A, Tanaka N.,Annu Rev Immunol.,11244049,2001                                                                                                                                                       |
| IRF7_TRAN               | IRF family of transcription factors as regulators of host defense.,Taniguchi T, Ogasawara K, Takaoka A, Tanaka N.,Annu Rev Immunol.,11244049,2001                                                                                                                                                       |
| JUN_DEGR                | c-Fos phosphorylation induced by H2O2 prevents proteasomal degradation of c-Fos in cardiomyocytes,Coronella-Wood J, Terrand J, Sun H, Chen QM.,J Biol Chem.,15136564,2004,8,6                                                                                                                           |
| JUN_DIME                | AP-1 function and regulation,Karin M, Liu Z, Zandi E.,Curr Opin Cell Biol.,9069263,1997,4                                                                                                                                                                                                               |
| KSR1_DEPH1              | Protein phosphatase 2A positively regulates Ras signaling by dephosphorylating KSR1 and Raf-1 on critical 14-3-3 binding sites.,Ory S, Zhou M, Conrads TP, Veenstra TD, Morrison DK.,Curr Biol.,12932319,2003,8,19                                                                                      |
| KSR1_RAF1_MAPK3/1_7PHOS | Properties of MEKs, the kinases that phosphorylate and activate the extracellular signal-regulated kinases.,Zheng CF, Guan KL.,J Biol Chem.,8226933,1993,11,15                                                                                                                                          |
| KSR1_RAF1_MAPK3/1_9PHOS | KSR: a MAPK scaffold of the Ras pathway?,Morrison DK.,J Cell Sci.,11309192,2001,5                                                                                                                                                                                                                       |
| KSR1_RAF1_MAPK3/1_9PHOS | Properties of MEKs, the kinases that phosphorylate and activate the extracellular signal-regulated kinases.,Zheng CF, Guan KL.,J Biol Chem.,8226933,1993,11,15                                                                                                                                          |
| KSR1_RAF1_MAPK3/1_BIND  | Protein phosphatase 2A positively regulates Ras signaling by dephosphorylating KSR1 and Raf-1 on critical 14-3-3 binding sites.,Ory S, Zhou M, Conrads TP, Veenstra TD, Morrison DK.,Curr Biol.,12932319,2003,8,19                                                                                      |

|                        |                                                                                                                                                                                                                                                                                                                                        |
|------------------------|----------------------------------------------------------------------------------------------------------------------------------------------------------------------------------------------------------------------------------------------------------------------------------------------------------------------------------------|
| KSR1_RAF1_MAPK3/1_BIND | Untying the regulation of the Raf-1 kinase.,Dhillon AS, Kolch W.,Arch Biochem Biophys.,12127063,2002,8,1                                                                                                                                                                                                                               |
| KSR1_RAF1_MAPK3/1_DISS | KSR: a MAPK scaffold of the Ras pathway?,Morrison DK.,J Cell Sci.,11309192,2001,5                                                                                                                                                                                                                                                      |
| KSR1_RAF1_MAPK3/1_DISS | Properties of MEKs, the kinases that phosphorylate and activate the extracellular signal-regulated kinases.,Zheng CF, Guan KL.,J Biol Chem.,8226933,1993,11,15                                                                                                                                                                         |
| MAP2K1_MAPK3/1         | Wiring diagrams of MAPK regulation by MEKK1, 2, and 3.,Uhlik MT, Abell AN, Cuevas BD, Nakamura K, Johnson GL.,Biochem Cell Biol.,15674433,2004,12                                                                                                                                                                                      |
| MAP2K3_MAPK11          | Activation of NF-kappa B by nontypeable Hemophilus influenzae is mediated by toll-like receptor 2-TAK1-dependent NIK-IKK alpha /beta-I kappa B alpha and MKK3/6-p38 MAP kinase signaling pathways in epithelial cells.,Shuto T, Xu H, Wang B, Han J, Kai H, Gu XX, Murphy TF, Lim DJ, Li JD.,Proc Natl Acad Sci USA,11438700,2001,7,17 |
| MAP2K3_MAPK11          | Pro-inflammatory cytokines and environmental stress cause p38 mitogen-activated protein kinase activation by dual phosphorylation on tyrosine and threonine.,Raingeaud J, Gupta S, Rogers JS, Dickens M, Han J, Ulevitch RJ, Davis RJ.,J Biol Chem.,7535770,1995,3,31                                                                  |
| MAP2K3_MAPK11          | Wiring diagrams of MAPK regulation by MEKK1, 2, and 3.,Uhlik MT, Abell AN, Cuevas BD, Nakamura K, Johnson GL.,Biochem Cell Biol.,15674433,2004,12                                                                                                                                                                                      |
| MAP2K3_MAPK14          | Activation of NF-kappa B by nontypeable Hemophilus influenzae is mediated by toll-like receptor 2-TAK1-dependent NIK-IKK alpha /beta-I kappa B alpha and MKK3/6-p38 MAP kinase signaling pathways in epithelial cells.,Shuto T, Xu H, Wang B, Han J, Kai H, Gu XX, Murphy TF, Lim DJ, Li JD.,Proc Natl Acad Sci USA,11438700,2001,7,17 |
| MAP2K3_MAPK14          | Pro-inflammatory cytokines and environmental stress cause p38 mitogen-activated protein kinase activation by dual phosphorylation on tyrosine and threonine.,Raingeaud J, Gupta S, Rogers JS, Dickens M, Han J, Ulevitch RJ, Davis RJ.,J Biol Chem.,7535770,1995,3,31                                                                  |
| MAP2K3_MAPK14          | Wiring diagrams of MAPK regulation by MEKK1, 2, and 3.,Uhlik MT, Abell AN, Cuevas BD, Nakamura K, Johnson GL.,Biochem Cell Biol.,15674433,2004,12                                                                                                                                                                                      |
| MAP2K3_TRAN            | Nuclear export of the stress-activated protein kinase p38 mediated by its substrate MAPKAP kinase-2.,Ben-Levy R, Hooper S, Wilson R, Paterson HF, Marshall CJ.,Curr Biol.,9768359,1998,9,24                                                                                                                                            |
| MAP2K3_TRAN2           | Nuclear export of the stress-activated protein kinase p38 mediated by its substrate MAPKAP kinase-2.,Ben-Levy R, Hooper S, Wilson R, Paterson HF, Marshall CJ.,Curr Biol.,9768359,1998,9,24                                                                                                                                            |
| MAP2K4_MAPK11          | Wiring diagrams of MAPK regulation by MEKK1, 2, and 3.,Uhlik MT, Abell AN, Cuevas BD, Nakamura K, Johnson GL.,Biochem Cell Biol.,15674433,2004,12                                                                                                                                                                                      |
| MAP2K4_MAPK14          | Wiring diagrams of MAPK regulation by MEKK1, 2, and 3.,Uhlik MT, Abell AN, Cuevas BD, Nakamura K, Johnson GL.,Biochem Cell Biol.,15674433,2004,12                                                                                                                                                                                      |
| MAP2K4_MAPK8           | Mitogen-activated protein kinase kinase 4 (MKK4).,Cuenda A.,Int J Biochem Cell Biol.,10785355,2000,6                                                                                                                                                                                                                                   |
| MAP2K4_MAPK8           | Synergistic activation of SAPK1/JNK1 by two MAP kinase kinases in vitro.,Lawler S, Fleming Y, Goedert M, Cohen P.,Curr Biol.,9889102,1998,12,17                                                                                                                                                                                        |
| MAP2K4_MAPK8           | The JNK signal transduction pathway.,Weston CR, Davis RJ.,Curr Opin Cell Biol.,17303404,2007,4                                                                                                                                                                                                                                         |
| MAP2K4_MAPK8           | Wiring diagrams of MAPK regulation by MEKK1, 2, and 3.,Uhlik MT, Abell AN, Cuevas BD, Nakamura K, Johnson GL.,Biochem Cell Biol.,15674433,2004,12                                                                                                                                                                                      |
| MAP2K6_MAPK11          | MKK3- and MKK6-regulated gene expression is mediated by the p38 mitogen-activated protein kinase signal transduction pathway.,Raingeaud J, Whitmarsh AJ, Barrett T, Dérijard B, Davis RJ.,Mol Cell Biol.,8622669,1996,3                                                                                                                |

|               |                                                                                                                                                                                                                                                                                         |
|---------------|-----------------------------------------------------------------------------------------------------------------------------------------------------------------------------------------------------------------------------------------------------------------------------------------|
| MAP2K6_MAPK14 | MKK3- and MKK6-regulated gene expression is mediated by the p38 mitogen-activated protein kinase signal transduction pathway.,Raingeaud J, Whitmarsh AJ, Barrett T, Dérijard B, Davis RJ.,Mol Cell Biol.,8622669,1996,3                                                                 |
| MAP2K6_TRAN   | Nuclear export of the stress-activated protein kinase p38 mediated by its substrate MAPKAP kinase-2.,Ben-Levy R, Hooper S, Wilson R, Paterson HF, Marshall CJ.,Curr Biol.,9768359,1998,9,24                                                                                             |
| MAP2K6_TRAN2  | Nuclear export of the stress-activated protein kinase p38 mediated by its substrate MAPKAP kinase-2.,Ben-Levy R, Hooper S, Wilson R, Paterson HF, Marshall CJ.,Curr Biol.,9768359,1998,9,24                                                                                             |
| MAP2K7_MAPK8  | Mitogen-activated protein kinase kinase 4 (MKK4).,Cuenda A.,Int J Biochem Cell Biol.,10785355,2000,6                                                                                                                                                                                    |
| MAP2K7_MAPK8  | Synergistic activation of SAPK1/JNK1 by two MAP kinase kinases in vitro.,Lawler S, Fleming Y, Goedert M, Cohen P.,Curr Biol.,9889102,1998,12,17                                                                                                                                         |
| MAP2K7_MAPK8  | The JNK signal transduction pathway.,Weston CR, Davis RJ.,Curr Opin Cell Biol.,17303404,2007,4                                                                                                                                                                                          |
| MAP2K7_MAPK8  | Wiring diagrams of MAPK regulation by MEKK1, 2, and 3.,Uhlik MT, Abell AN, Cuevas BD, Nakamura K, Johnson GL.,Biochem Cell Biol.,15674433,2004,12                                                                                                                                       |
| MAP3K14_IKK   | Functional interactions of transforming growth factor beta-activated kinase 1 with IkappaB kinases to stimulate NF-kappaB activation.,Sakurai H, Miyoshi H, Toriumi W, Sugita T.,J Biol Chem.,10187861,1999,4,9                                                                         |
| MAP3K14_IKK   | NF-kappaB-inducing kinase activates IKK-alpha by phosphorylation of Ser-176.,Ling L, Cao Z, Goeddel DV.,Proc Natl Acad Sci USA,9520446,1998,3,31                                                                                                                                        |
| MAP3K1_DEGR   | Ubiquitylation of MEKK1 inhibits its phosphorylation of MKK1 and MKK4 and activation of the ERK1/2 and JNK pathways.,Witowsky JA, Johnson GL.,J Biol Chem.,12456688,2003,1,17                                                                                                           |
| MAP3K1_IKK    | Differential regulation of IkappaB kinase alpha and beta by two upstream kinases, NF-kappaB-inducing kinase and mitogen-activated protein kinase/ERK kinase kinase-1.,Nakano H, Shindo M, Sakon S, Nishinaka S, Mihara M, Yagita H, Okumura K.,Proc Natl Acad Sci USA,9520401,1998,3,31 |
| MAP3K1_MAP2K1 | MEKK1 phosphorylates MEK1 and MEK2 but does not cause activation of mitogen-activated protein kinase.,Xu S, Robbins D, Frost J, Dang A, Lange-Carter C, Cobb MH.,Proc Natl Acad Sci USA,7624324,1995,7,18                                                                               |
| MAP3K1_MAP2K1 | Raf kinase inhibitor protein interacts with NF-kappaB-inducing kinase and TAK1 and inhibits NF-kappaB activation.,Yeung KC, Rose DW, Dhillon AS, Yaros D, Gustafsson M, Chatterjee D, McFerran B, Wyche J, Kolch W, Sedivy JM.,Mol Cell Biol.,11585904,2001,11                          |
| MAP3K1_MAP2K1 | Wiring diagrams of MAPK regulation by MEKK1, 2, and 3.,Uhlik MT, Abell AN, Cuevas BD, Nakamura K, Johnson GL.,Biochem Cell Biol.,15674433,2004,12                                                                                                                                       |
| MAP3K1_MAP2K4 | Wiring diagrams of MAPK regulation by MEKK1, 2, and 3.,Uhlik MT, Abell AN, Cuevas BD, Nakamura K, Johnson GL.,Biochem Cell Biol.,15674433,2004,12                                                                                                                                       |
| MAP3K1_MAP2K7 | Differential activation of two JNK activators, MKK7 and SEK1, by MKN28-derived nonreceptor serine/threonine kinase/mixed lineage kinase 2., Hirai S, Noda K, Moriguchi T, Nishida E, Yamashita A, Deyama T, Fukuyama K, Ohno S.,J Biol Chem.,9516438,1998,3,27                          |
| MAP3K1_PHOS   | Signaling by proinflammatory cytokines: oligomerization of TRAF2 and TRAF6 is sufficient for JNK and IKK activation and target gene induction via an amino-terminal effector domain.,Baud V, Liu ZG, Bennett B, Suzuki N, Xia Y, Karin M.,Genes Dev.,10346818,1999,5,15                 |
| MAP3K1_UBIQ   | Ubiquitylation of MEKK1 inhibits its phosphorylation of MKK1 and MKK4 and activation of the ERK1/2 and JNK pathways.,Witowsky JA, Johnson GL.,J Biol Chem.,12456688,2003,1,17                                                                                                           |

|                        |                                                                                                                                                                                                                                                                                                  |
|------------------------|--------------------------------------------------------------------------------------------------------------------------------------------------------------------------------------------------------------------------------------------------------------------------------------------------|
| MAP3K3_MAP2K3          | Characterization of the mitogen-activated protein kinase kinase 4 (MKK4)/c-Jun NH2 terminal kinase 1 and MKK3/p38 pathways regulated by MEK kinases 2 and 3. MEK kinase 3 activates MKK3 but does not cause activation of p38 kinase in vivo.,Deacon K, Blank JL.,J Biol Chem.,9162092,1997,5,30 |
| MAP3K3_MAP2K3          | Wiring diagrams of MAPK regulation by MEKK1, 2, and 3.,Uhlik MT, Abell AN, Cuevas BD, Nakamura K, Johnson GL.,Biochem Cell Biol.,15674433,2004,12                                                                                                                                                |
| MAP3K3_MAP2K4          | Characterization of the mitogen-activated protein kinase kinase 4 (MKK4)/c-Jun NH2 terminal kinase 1 and MKK3/p38 pathways regulated by MEK kinases 2 and 3. MEK kinase 3 activates MKK3 but does not cause activation of p38 kinase in vivo.,Deacon K, Blank JL.,J Biol Chem.,9162092,1997,5,30 |
| MAP3K3_MAP2K4          | Wiring diagrams of MAPK regulation by MEKK1, 2, and 3.,Uhlik MT, Abell AN, Cuevas BD, Nakamura K, Johnson GL.,Biochem Cell Biol.,15674433,2004,12                                                                                                                                                |
| MAP3K3_MAP2K6          | MEK kinase 3 directly activates MKK6 and MKK7, specific activators of the p38 and c-Jun NH2-terminal kinases.,Deacon K, Blank JL.,J Biol Chem.,10347227,1999,6,4                                                                                                                                 |
| MAP3K3_MAP2K6          | Wiring diagrams of MAPK regulation by MEKK1, 2, and 3.,Uhlik MT, Abell AN, Cuevas BD, Nakamura K, Johnson GL.,Biochem Cell Biol.,15674433,2004,12                                                                                                                                                |
| MAP3K3_MAP2K7          | MEK kinase 3 directly activates MKK6 and MKK7, specific activators of the p38 and c-Jun NH2-terminal kinases.,Deacon K, Blank JL.,J Biol Chem.,10347227,1999,6,4                                                                                                                                 |
| MAP3K3_MAP2K7          | Wiring diagrams of MAPK regulation by MEKK1, 2, and 3.,Uhlik MT, Abell AN, Cuevas BD, Nakamura K, Johnson GL.,Biochem Cell Biol.,15674433,2004,12                                                                                                                                                |
| MAP3K5_MAP2K3          | Induction of apoptosis by ASK1, a mammalian MAPKKK that activates SAPK/JNK and p38 signaling pathways.,Ichijo H, Nishida E, Irie K, ten Dijke P, Saitoh M, Moriguchi T, Takagi M, Matsumoto K, Miyazono K, Gotoh Y.,Science,8974401,1997,1,3                                                     |
| MAP3K5_MAP2K4          | Induction of apoptosis by ASK1, a mammalian MAPKKK that activates SAPK/JNK and p38 signaling pathways.,Ichijo H, Nishida E, Irie K, ten Dijke P, Saitoh M, Moriguchi T, Takagi M, Matsumoto K, Miyazono K, Gotoh Y.,Science,8974401,1997,1,3                                                     |
| MAP3K5_MAP2K6          | Induction of apoptosis by ASK1, a mammalian MAPKKK that activates SAPK/JNK and p38 signaling pathways.,Ichijo H, Nishida E, Irie K, ten Dijke P, Saitoh M, Moriguchi T, Takagi M, Matsumoto K, Miyazono K, Gotoh Y.,Science,8974401,1997,1,3                                                     |
| MAP3K5_TRXRED_BI<br>ND | Activation of apoptosis signal-regulating kinase 1 by the stress-induced activating phosphorylation of pre-formed oligomer.,Tobiume K, Saitoh M, Ichijo H.,J Cell Physiol.,11920685,2002,4                                                                                                       |
| MAP3K5_TRXRED_BI<br>ND | Mammalian thioredoxin is a direct inhibitor of apoptosis signal-regulating kinase (ASK) 1.,Saitoh M, Nishitoh H, Fujii M, Takeda K, Tobiume K, Sawada Y, Kawabata M, Miyazono K, Ichijo H.,EMBO J.,9564042,1998,5,1                                                                              |
| MAP3K5_TRXRED_DI<br>SS | Activation of apoptosis signal-regulating kinase 1 by the stress-induced activating phosphorylation of pre-formed oligomer.,Tobiume K, Saitoh M, Ichijo H.,J Cell Physiol.,11920685,2002,4                                                                                                       |
| MAP3K5_TRXRED_DI<br>SS | Mammalian thioredoxin is a direct inhibitor of apoptosis signal-regulating kinase (ASK) 1.,Saitoh M, Nishitoh H, Fujii M, Takeda K, Tobiume K, Sawada Y, Kawabata M, Miyazono K, Ichijo H.,EMBO J.,9564042,1998,5,1                                                                              |
| MAP3K7/IP123_BIND      | TAB3, a new binding partner of the protein kinase TAK1.,Cheung PC, Nebreda AR, Cohen P.,Biochem J.,14670075,2004,2,15                                                                                                                                                                            |
| MAP3K7/IP123_BIND      | TAK1-dependent signaling requires functional interaction with TAB2/TAB3.,Besse A, Lamothe B, Campos AD, Webster WK, Maddineni U, Lin SC, Wu H, Darnay BG.,J Biol Chem.,17158449,2007,2,9                                                                                                         |



|                       |                                                                                                                                                                                                                                                                                                                                           |
|-----------------------|-------------------------------------------------------------------------------------------------------------------------------------------------------------------------------------------------------------------------------------------------------------------------------------------------------------------------------------------|
| MAP3K7IP_TRAF6_3 PHOS | Critical roles of threonine 187 phosphorylation in cellular stress-induced rapid and transient activation of transforming growth factor-beta-activated kinase 1 (TAK1) in a signaling complex containing TAK1-binding protein TAB1 and TAB2.,Singhirunnusorn P, Suzuki S, Kawasaki N, Saiki I, Sakurai H.,J Biol Chem.,15590691,2005,2,25 |
| MAP3K7IP_TRAF6_U BIQ  | Role of the TAB2-related protein TAB3 in IL-1 and TNF signaling.,Ishitani T, Takaesu G, Ninomiya-Tsuji J, Shibuya H, Gaynor RB, Matsumoto K.,EMBO J.,14633987,2003,12,1                                                                                                                                                                   |
| MAP3K7IP_TRAF6_U BIQ  | TAK1 is a ubiquitin-dependent kinase of MKK and IKK.,Wang C, Deng L, Hong M, Akkaraju GR, Inoue J, Chen ZJ.,Nature,11460167,2001,7,19                                                                                                                                                                                                     |
| MAP3K7_IKK            | Functional interactions of transforming growth factor beta-activated kinase 1 with I kappa B kinases to stimulate NF-kappa B activation.,Sakurai H, Miyoshi H, Toriumi W, Sugita T.,J Biol Chem.,10187861,1999,4,9                                                                                                                        |
| MAP3K7_IKK            | TAK1 is a ubiquitin-dependent kinase of MKK and IKK.,Wang C, Deng L, Hong M, Akkaraju GR, Inoue J, Chen ZJ.,Nature,11460167,2001,7,19                                                                                                                                                                                                     |
| MAP3K7_IKK            | TAK1 mediates an activation signal from toll-like receptor(s) to nuclear factor-kappa B in lipopolysaccharide-stimulated macrophages.,Irie T, Muta T, Takeshige K.,FEBS Lett.,10675530,2000,2,11                                                                                                                                          |
| MAP3K7_IKK            | TAK1 regulates multiple protein kinase cascades activated by bacterial lipopolysaccharide.,Lee J, Mira-Arbibe L, Ulevitch RJ.,J Leukoc Biol.,11129660,2000,12                                                                                                                                                                             |
| MAP3K7_MAP2K3         | TGF-beta-activated kinase 1 and TAK1-binding protein 1 cooperate to mediate TGF-beta1-induced MKK3-p38 MAPK activation and stimulation of type I collagen.,Kim SI, Kwak JH, Zachariah M, He Y, Wang L, Choi ME.,Am J Physiol Renal Physiol.,17299140,2007,5                                                                               |
| MAP3K7_MAP2K6         | TAK1 is a ubiquitin-dependent kinase of MKK and IKK.,Wang C, Deng L, Hong M, Akkaraju GR, Inoue J, Chen ZJ.,Nature,11460167,2001,7,19                                                                                                                                                                                                     |
| MAP3K7_MAP3K14        | The kinase TAK1 can activate the NIK-I kappa B as well as the MAP kinase cascade in the IL-1 signalling pathway.,Ninomiya-Tsuji J, Kishimoto K, Hiyama A, Inoue J, Cao Z, Matsumoto K.,Nature,10094049,1999,3,18                                                                                                                          |
| MAP3K7_MAPK14         | MAPKK-independent activation of p38alpha mediated by TAB1-dependent autophosphorylation of p38alpha.,Ge B, Gram H, Di Padova F, Huang B, New L, Ulevitch RJ, Luo Y, Han J.,Science,11847341,2002,2,15                                                                                                                                     |
| MAP3K8(p58)_DEGR      | Phosphorylation at Thr-290 regulates Tpl2 binding to NF-kappa B1/p105 and Tpl2 activation and degradation by lipopolysaccharide.,Cho J, Tschlis PN.,Proc Natl Acad Sci USA,15699325,2005,2,15                                                                                                                                             |
| MAP3K8(p58)_KSR2_BIND | Identification of a novel human kinase supporter of Ras (hKSR-2) that functions as a negative regulator of Cot (Tpl2) signaling.,Channavajhala PL, Wu L, Cuozzo JW, Hall JP, Liu W, Lin LL, Zhang Y.,J Biol Chem.,12975377,2003,11,21                                                                                                     |
| MAP3K8_MAP2K1         | Raf kinase inhibitor protein interacts with NF-kappa B-inducing kinase and TAK1 and inhibits NF-kappa B activation.,Yeung KC, Rose DW, Dhillon AS, Yaros D, Gustafsson M, Chatterjee D, McFerran B, Wyche J, Kolch W, Sedivy JM.,Mol Cell Biol.,11585904,2001,11                                                                          |
| MAP3K8_MAP2K1         | TNF-alpha induction by LPS is regulated posttranscriptionally via a Tpl2/ERK-dependent pathway.,Dumitru CD, Ceci JD, Tsatsanis C, Kontoyiannis D, Stamatakis K, Lin JH, Patriotis C, Jenkins NA, Copeland NG, Kollias G, Tschlis PN.,Cell,11163183,2000,12,22                                                                             |
| MAP3K8_MAP3K14        | The proto-oncogene Cot kinase participates in CD3/CD28 induction of NF-kappa B acting through the NF-kappa B-inducing kinase and I kappa B kinases.,Lin X, Cunningham ET, Mu Y, Gelezianas R, Greene WC.,Immunity,10072079,1999,2                                                                                                         |
| MAP3K8_NFKB_BIND      | Phosphorylation at Thr-290 regulates Tpl2 binding to NF-kappa B1/p105 and Tpl2 activation and degradation by lipopolysaccharide.,Cho J, Tschlis PN.,Proc Natl Acad Sci USA,15699325,2005,2,15                                                                                                                                             |

|                      |                                                                                                                                                                                                                                                                                                    |
|----------------------|----------------------------------------------------------------------------------------------------------------------------------------------------------------------------------------------------------------------------------------------------------------------------------------------------|
| MAP3K8_NFKB_DISS     | Phosphorylation at Thr-290 regulates Tpl2 binding to NF-kappaB1/p105 and Tpl2 activation and degradation by lipopolysaccharide.,Cho J, Tschlis PN.,Proc Natl Acad Sci USA,15699325,2005,2,15                                                                                                       |
| MAP3K8_NFKB_DISS     | Tpl2 (tumor progression locus 2) phosphorylation at Thr290 is induced by lipopolysaccharide via an Ikappa-B Kinase-beta-dependent pathway and is required for Tpl2 activation by external signals.,Cho J, Melnick M, Solidakis GP, Tschlis PN.,J Biol Chem.,15778223,2005,5,27                     |
| MAPK11_ATF2          | MKK3- and MKK6-regulated gene expression is mediated by the p38 mitogen-activated protein kinase signal transduction pathway.,Raugeaud J, Whitmarsh AJ, Barrett T, Dérijard B, Davis RJ.,Mol Cell Biol.,8622669,1996,3                                                                             |
| MAPK11_ATF2          | Novel homologues of CSBP/p38 MAP kinase: activation, substrate specificity and sensitivity to inhibition by pyridinyl imidazoles.,Kumar S, McDonnell PC, Gum RJ, Hand AT, Lee JC, Young PR.,Biochem Biophys Res Commun.,9207191,1997,6,27                                                          |
| MAPK11_ELK1          | MKK3- and MKK6-regulated gene expression is mediated by the p38 mitogen-activated protein kinase signal transduction pathway.,Raugeaud J, Whitmarsh AJ, Barrett T, Dérijard B, Davis RJ.,Mol Cell Biol.,8622669,1996,3                                                                             |
| MAPK11_ELK1          | The SRF accessory protein Elk-1 contains a growth factor-regulated transcriptional activation domain.,Marais R, Wynne J, Treisman R.,Cell,8386592,1993,4,23                                                                                                                                        |
| MAPK11_MAPKAPK2      | Nuclear export of the stress-activated protein kinase p38 mediated by its substrate MAPKAP kinase-2.,Ben-Levy R, Hooper S, Wilson R, Paterson HF, Marshall CJ.,Curr Biol.,9768359,1998,9,24                                                                                                        |
| MAPK11_MAPKAPK2      | Structure of mitogen-activated protein kinase-activated protein (MAPKAP) kinase 2 suggests a bifunctional switch that couples kinase activation with nuclear export.,Meng W, Swenson LL, Fitzgibbon MJ, Hayakawa K, Ter Haar E, Behrens AE, Fulghum JR, Lippke JA.,J Biol Chem.,12171911,2002,10,4 |
| MAPK11_MAPKAPK2_BIND | Nuclear export of the stress-activated protein kinase p38 mediated by its substrate MAPKAP kinase-2.,Ben-Levy R, Hooper S, Wilson R, Paterson HF, Marshall CJ.,Curr Biol.,9768359,1998,9,24                                                                                                        |
| MAPK11_MAPKAPK2_BIND | Structure of mitogen-activated protein kinase-activated protein (MAPKAP) kinase 2 suggests a bifunctional switch that couples kinase activation with nuclear export.,Meng W, Swenson LL, Fitzgibbon MJ, Hayakawa K, Ter Haar E, Behrens AE, Fulghum JR, Lippke JA.,J Biol Chem.,12171911,2002,10,4 |
| MAPK11_MAPKAPK2_TRAN | Nuclear export of the stress-activated protein kinase p38 mediated by its substrate MAPKAP kinase-2.,Ben-Levy R, Hooper S, Wilson R, Paterson HF, Marshall CJ.,Curr Biol.,9768359,1998,9,24                                                                                                        |
| MAPK11_MAPKAPK2_TRAN | Structure of mitogen-activated protein kinase-activated protein (MAPKAP) kinase 2 suggests a bifunctional switch that couples kinase activation with nuclear export.,Meng W, Swenson LL, Fitzgibbon MJ, Hayakawa K, Ter Haar E, Behrens AE, Fulghum JR, Lippke JA.,J Biol Chem.,12171911,2002,10,4 |
| MAPK11_MBP           | Novel homologues of CSBP/p38 MAP kinase: activation, substrate specificity and sensitivity to inhibition by pyridinyl imidazoles.,Kumar S, McDonnell PC, Gum RJ, Hand AT, Lee JC, Young PR.,Biochem Biophys Res Commun.,9207191,1997,6,27                                                          |
| MAPK11_MKNK1         | MNK1, a new MAP kinase-activated protein kinase, isolated by a novel expression screening method for identifying protein kinase substrates.,Fukunaga R, Hunter T.,EMBO J.,9155018,1997,4,15                                                                                                        |
| MAPK11_MKNK1         | Mitogen-activated protein kinases activate the serine/threonine kinases Mnk1 and Mnk2.,Waskiewicz AJ, Flynn A, Proud CG, Cooper JA.,EMBO J.,9155017,1997,4,15                                                                                                                                      |
| MAPK11_MSK1          | MSK1 activity is controlled by multiple phosphorylation sites.,McCoy CE, Campbell DG, Deak M, Bloomberg GB, Arthur JS.,Biochem J.,15568999,2005,4,15                                                                                                                                               |

|                       |                                                                                                                                                                                                                                                                                                                                          |
|-----------------------|------------------------------------------------------------------------------------------------------------------------------------------------------------------------------------------------------------------------------------------------------------------------------------------------------------------------------------------|
| MAPK11_MS1            | Mitogen- and stress-activated protein kinase-1 (MSK1) is directly activated by MAPK and SAPK2/p38, and may mediate activation of CREB.,Deak M, Clifton AD, Lucocq LM, Alessi DR.,EMBO J.,9687510,1998,8,3                                                                                                                                |
| MAPK11_TRAN2          | Nuclear export of the stress-activated protein kinase p38 mediated by its substrate MAPKAP kinase-2.,Ben-Levy R, Hooper S, Wilson R, Paterson HF, Marshall CJ.,Curr Biol.,9768359,1998,9,24                                                                                                                                              |
| MAPK11_TRAN2          | Structure of mitogen-activated protein kinase-activated protein (MAPKAP) kinase 2 suggests a bifunctional switch that couples kinase activation with nuclear export.,Meng W, Swenson LL, Fitzgibbon MJ, Hayakawa K, Ter Haar E, Behrens AE, Fulghum JR, Lippke JA.,J Biol Chem.,12171911,2002,10,4                                       |
| MAPK14_ATF2           | MKK3- and MKK6-regulated gene expression is mediated by the p38 mitogen-activated protein kinase signal transduction pathway.,Raugeaud J, Whitmarsh AJ, Barrett T, Dérijard B, Davis RJ.,Mol Cell Biol.,8622669,1996,3                                                                                                                   |
| MAPK14_ATF2           | Novel homologues of CSBP/p38 MAP kinase: activation, substrate specificity and sensitivity to inhibition by pyridinyl imidazoles.,Kumar S, McDonnell PC, Gum RJ, Hand AT, Lee JC, Young PR.,Biochem Biophys Res Commun.,9207191,1997,6,27                                                                                                |
| MAPK14_ELK1           | MKK3- and MKK6-regulated gene expression is mediated by the p38 mitogen-activated protein kinase signal transduction pathway.,Raugeaud J, Whitmarsh AJ, Barrett T, Dérijard B, Davis RJ.,Mol Cell Biol.,8622669,1996,3                                                                                                                   |
| MAPK14_ELK1           | The SRF accessory protein Elk-1 contains a growth factor-regulated transcriptional activation domain.,Marais R, Wynne J, Treisman R.,Cell,8386592,1993,4,23                                                                                                                                                                              |
| MAPK14_MAP3K7IP_TRAF6 | Critical roles of threonine 187 phosphorylation in cellular stress-induced rapid and transient activation of transforming growth factor-beta-activated kinase 1 (TAK1) in a signaling complex containing TAK1-binding protein TAB1 and TAB2.,Singhirunusorn P, Suzuki S, Kawasaki N, Saiki I, Sakurai H.,J Biol Chem.,15590691,2005,2,25 |
| MAPK14_MAP3K7IP_TRAF6 | Feedback control of the protein kinase TAK1 by SAPK2a/p38alpha.,Cheung PC, Campbell DG, Nebreda AR, Cohen P.,EMBO J.,14592977,2003,11,3                                                                                                                                                                                                  |
| MAPK14_MAPKAPK2       | Nuclear export of the stress-activated protein kinase p38 mediated by its substrate MAPKAP kinase-2.,Ben-Levy R, Hooper S, Wilson R, Paterson HF, Marshall CJ.,Curr Biol.,9768359,1998,9,24                                                                                                                                              |
| MAPK14_MAPKAPK2       | Structure of mitogen-activated protein kinase-activated protein (MAPKAP) kinase 2 suggests a bifunctional switch that couples kinase activation with nuclear export.,Meng W, Swenson LL, Fitzgibbon MJ, Hayakawa K, Ter Haar E, Behrens AE, Fulghum JR, Lippke JA.,J Biol Chem.,12171911,2002,10,4                                       |
| MAPK14_MAPKAPK2_BIND  | Nuclear export of the stress-activated protein kinase p38 mediated by its substrate MAPKAP kinase-2.,Ben-Levy R, Hooper S, Wilson R, Paterson HF, Marshall CJ.,Curr Biol.,9768359,1998,9,24                                                                                                                                              |
| MAPK14_MAPKAPK2_BIND  | Structure of mitogen-activated protein kinase-activated protein (MAPKAP) kinase 2 suggests a bifunctional switch that couples kinase activation with nuclear export.,Meng W, Swenson LL, Fitzgibbon MJ, Hayakawa K, Ter Haar E, Behrens AE, Fulghum JR, Lippke JA.,J Biol Chem.,12171911,2002,10,4                                       |
| MAPK14_MAPKAPK2_TRAN  | Nuclear export of the stress-activated protein kinase p38 mediated by its substrate MAPKAP kinase-2.,Ben-Levy R, Hooper S, Wilson R, Paterson HF, Marshall CJ.,Curr Biol.,9768359,1998,9,24                                                                                                                                              |
| MAPK14_MAPKAPK2_TRAN  | Structure of mitogen-activated protein kinase-activated protein (MAPKAP) kinase 2 suggests a bifunctional switch that couples kinase activation with nuclear export.,Meng W, Swenson LL, Fitzgibbon MJ, Hayakawa K, Ter Haar E, Behrens AE, Fulghum JR, Lippke JA.,J Biol Chem.,12171911,2002,10,4                                       |
| MAPK14_MBP            | Novel homologues of CSBP/p38 MAP kinase: activation, substrate specificity and sensitivity to inhibition by pyridinyl imidazoles.,Kumar S, McDonnell PC, Gum RJ, Hand AT, Lee JC, Young PR.,Biochem Biophys Res Commun.,9207191,1997,6,27                                                                                                |

|               |                                                                                                                                                                                                                                                                                                    |
|---------------|----------------------------------------------------------------------------------------------------------------------------------------------------------------------------------------------------------------------------------------------------------------------------------------------------|
| MAPK14_MKNK1  | MNK1, a new MAP kinase-activated protein kinase, isolated by a novel expression screening method for identifying protein kinase substrates.,Fukunaga R, Hunter T.,EMBO J.,9155018,1997,4,15                                                                                                        |
| MAPK14_MKNK1  | Mitogen-activated protein kinases activate the serine/threonine kinases Mnk1 and Mnk2.,Waskiewicz AJ, Flynn A, Proud CG, Cooper JA.,EMBO J.,9155017,1997,4,15                                                                                                                                      |
| MAPK14_MSK1   | MSK1 activity is controlled by multiple phosphorylation sites.,McCoy CE, Campbell DG, Deak M, Bloomberg GB, Arthur JS.,Biochem J.,15568999,2005,4,15                                                                                                                                               |
| MAPK14_MSK1   | Mitogen- and stress-activated protein kinase-1 (MSK1) is directly activated by MAPK and SAPK2/p38, and may mediate activation of CREB.,Deak M, Clifton AD, Lucocq LM, Alessi DR.,EMBO J.,9687510,1998,8,3                                                                                          |
| MAPK14_TRAN2  | Nuclear export of the stress-activated protein kinase p38 mediated by its substrate MAPKAP kinase-2.,Ben-Levy R, Hooper S, Wilson R, Paterson HF, Marshall CJ.,Curr Biol.,9768359,1998,9,24                                                                                                        |
| MAPK14_TRAN2  | Structure of mitogen-activated protein kinase-activated protein (MAPKAP) kinase 2 suggests a bifunctional switch that couples kinase activation with nuclear export.,Meng W, Swenson LL, Fitzgibbon MJ, Hayakawa K, Ter Haar E, Behrens AE, Fulghum JR, Lippke JA.,J Biol Chem.,12171911,2002,10,4 |
| MAPK3/1_DEPH  | MKP-1 (3CH134), an immediate early gene product, is a dual specificity phosphatase that dephosphorylates MAP kinase in vivo.,Sun H, Charles CH, Lau LF, Tonks NK.,Cell.,8221888,1993,11,5                                                                                                          |
| MAPK3/1_DIME  | Two co-existing mechanisms for nuclear import of MAP kinase: passive diffusion of a monomer and active transport of a dimer.,Adachi M, Fukuda M, Nishida E.,EMBO J.,10508167,1999,10,1                                                                                                             |
| MAPK3/1_ELK1  | The SRF accessory protein Elk-1 contains a growth factor-regulated transcriptional activation domain.,Marais R, Wynne J, Treisman R.,Cell,8386592,1993,4,23                                                                                                                                        |
| MAPK3/1_MBP   | Novel homologues of CSBP/p38 MAP kinase: activation, substrate specificity and sensitivity to inhibition by pyridinyl imidazoles.,Kumar S, McDonnell PC, Gum RJ, Hand AT, Lee JC, Young PR.,Biochem Biophys Res Commun.,9207191,1997,6,27                                                          |
| MAPK3/1_MKNK1 | Mitogen-activated protein kinases activate the serine/threonine kinases Mnk1 and Mnk2.,Waskiewicz AJ, Flynn A, Proud CG, Cooper JA.,EMBO J.,9155017,1997,4,15                                                                                                                                      |
| MAPK3/1_MKNK2 | Mitogen-activated protein kinases activate the serine/threonine kinases Mnk1 and Mnk2.,Waskiewicz AJ, Flynn A, Proud CG, Cooper JA.,EMBO J.,9155017,1997,4,15                                                                                                                                      |
| MAPK3/1_MSK1  | MSK1 activity is controlled by multiple phosphorylation sites.,McCoy CE, Campbell DG, Deak M, Bloomberg GB, Arthur JS.,Biochem J.,15568999,2005,4,15                                                                                                                                               |
| MAPK3/1_MSK1  | Mitogen- and stress-activated protein kinase-1 (MSK1) is directly activated by MAPK and SAPK2/p38, and may mediate activation of CREB.,Deak M, Clifton AD, Lucocq LM, Alessi DR.,EMBO J.,9687510,1998,8,3                                                                                          |
| MAPK3/1_MYC   | Transactivation of gene expression by Myc is inhibited by mutation at the phosphorylation sites Thr-58 and Ser-62.,Gupta S, Seth A, Davis RJ.,Proc Natl Acad Sci USA,8386367,1993,4,15                                                                                                             |
| MAPK3/1_TRAN  | Two co-existing mechanisms for nuclear import of MAP kinase: passive diffusion of a monomer and active transport of a dimer.,Adachi M, Fukuda M, Nishida E.,EMBO J.,10508167,1999,10,1                                                                                                             |
| MAPK8_ATF2    | The activation of c-Jun NH2-terminal kinase (JNK) by DNA-damaging agents serves to promote drug resistance via activating transcription factor 2 (ATF2)-dependent enhanced DNA repair.,Hayakawa J, Depatie C, Ohmichi M, Mercola D.,J Biol Chem.,12663670,2003,6,6                                 |

|                |                                                                                                                                                                                                                                                                                                          |
|----------------|----------------------------------------------------------------------------------------------------------------------------------------------------------------------------------------------------------------------------------------------------------------------------------------------------------|
| MAPK8_FOS      | c-Fos phosphorylation induced by H <sub>2</sub> O <sub>2</sub> prevents proteasomal degradation of c-Fos in cardiomyocytes, Coronella-Wood J, Terrand J, Sun H, Chen QM., J Biol Chem, 15136564, 2004, 8, 6                                                                                              |
| MAPK8_JUN      | The JNK signal transduction pathway., Weston CR, Davis RJ., Curr Opin Cell Biol., 17303404, 2007, 4                                                                                                                                                                                                      |
| MAPK8_TRAN     | A novel mechanism of JNK1 activation. Nuclear translocation and activation of JNK1 during ischemia and reperfusion., Mizukami Y, Yoshioka K, Morimoto S, Yoshida K., J Biol Chem., 9195981, 1997, 6, 27                                                                                                  |
| MAPK8_TRAN     | Phosphorylation of JNK is involved in regulation of H(+)-induced c-Jun expression., Shimokawa N, Qiu CH, Seki T, Dikic I, Koibuchi N., Cell Signal., 15093613, 2004, 6                                                                                                                                   |
| MAPK8_TRAN2    | A novel mechanism of JNK1 activation. Nuclear translocation and activation of JNK1 during ischemia and reperfusion., Mizukami Y, Yoshioka K, Morimoto S, Yoshida K., J Biol Chem., 9195981, 1997, 6, 27                                                                                                  |
| MAPK8_TRAN2    | Phosphorylation of JNK is involved in regulation of H(+)-induced c-Jun expression., Shimokawa N, Qiu CH, Seki T, Dikic I, Koibuchi N., Cell Signal., 15093613, 2004, 6                                                                                                                                   |
| MAPKAPK2_2PHOS | Identification of novel phosphorylation sites required for activation of MAPKAP kinase-2., Ben-Levy R, Leighton IA, Doza YN, Attwood P, Morrice N, Marshall CJ, Cohen P., EMBO J., 8846784, 1995, 12, 1                                                                                                  |
| MAPKAPK2_2PHOS | Structure of mitogen-activated protein kinase-activated protein (MAPKAP) kinase 2 suggests a bifunctional switch that couples kinase activation with nuclear export., Meng W, Swenson LL, Fitzgibbon MJ, Hayakawa K, Ter Haar E, Behrens AE, Fulghum JR, Lippke JA., J Biol Chem., 12171911, 2002, 10, 4 |
| MAPKAPK2_CREB  | FGF and stress regulate CREB and ATF-1 via a pathway involving p38 MAP kinase and MAPKAP kinase-2., Tan Y, Rouse J, Zhang A, Cariati S, Cohen P, Comb MJ., EMBO J., 8887554, 1996, 9, 2                                                                                                                  |
| MAPKAPK2_HSP27 | Identification of MAPKAP kinase 2 as a major enzyme responsible for the phosphorylation of the small mammalian heat shock proteins., Stokoe D, Engel K, Campbell DG, Cohen P, Gaestel M., FEBS Lett., 1332886, 1992, 11, 30                                                                              |
| MAPKAPK2_HSP27 | Phosphorylation of the 27-kDa heat shock protein via p38 MAP kinase and MAPKAP kinase in smooth muscle., Larsen JK, Yamboliev IA, Weber LA, Gerthoffer WT., Am J Physiol., 9374719, 1997, 11                                                                                                             |
| MD2_DIME       | The role of disulfide bonds in the assembly and function of MD-2., Mullen GE, Kennedy MN, Visintin A, Mazzoni A, Leifer CA, Davies DR, Segal DM., Proc Natl Acad Sci USA., 12642668, 2003, 4, 1                                                                                                          |
| MKNK1_EIF4E    | Mitogen-activated protein kinases activate the serine/threonine kinases Mnk1 and Mnk2., Waskiewicz AJ, Flynn A, Proud CG, Cooper JA., EMBO J., 9155017, 1997, 4, 15                                                                                                                                      |
| MSK1_5PHOS     | MSK1 activity is controlled by multiple phosphorylation sites., McCoy CE, Campbell DG, Deak M, Bloomberg GB, Arthur JS., Biochem J., 15568999, 2005, 4, 15                                                                                                                                               |
| MSK1_CREB      | MSK1 and MSK2 are required for the mitogen- and stress-induced phosphorylation of CREB and ATF1 in fibroblasts., Wiggin GR, Soloaga A, Foster JM, Murray-Tait V, Cohen P, Arthur JS., Mol Cell Biol., 11909979, 2002, 4                                                                                  |
| MSK1_HH3       | MSK2 and MSK1 mediate the mitogen- and stress-induced phosphorylation of histone H3 and HMG-14., Soloaga A, Thomson S, Wiggin GR, Rampersaud N, Dyson MH, Hazzalin CA, Mahadevan LC, Arthur JS., EMBO J., 12773393, 2003, 6, 2                                                                           |
| MSK1_HH3       | The nucleosomal response associated with immediate-early gene induction is mediated via alternative MAP kinase cascades: MSK1 as a potential histone H3/HMG-14 kinase., Thomson S, Clayton AL, Hazzalin CA, Rose S, Barratt MJ, Mahadevan LC., EMBO J., 10469656, 1999, 9, 1                             |

|                         |                                                                                                                                                                                                                                                                          |
|-------------------------|--------------------------------------------------------------------------------------------------------------------------------------------------------------------------------------------------------------------------------------------------------------------------|
| MSK1_HMG14              | MSK2 and MSK1 mediate the mitogen- and stress-induced phosphorylation of histone H3 and HMG-14.,Soloaga A, Thomson S, Wiggin GR, Rampersaud N, Dyson MH, Hazzalin CA, Mahadevan LC, Arthur JS.,EMBO J.,12773393,2003,6,2                                                 |
| MSK1_HMG14              | The nucleosomal response associated with immediate-early gene induction is mediated via alternative MAP kinase cascades: MSK1 as a potential histone H3/HMG-14 kinase.,Thomson S, Clayton AL, Hazzalin CA, Rose S, Barratt MJ, Mahadevan LC.,EMBO J.,10469656,1999,9,1   |
| MSK1_NFKB               | Post-translational modifications regulating the activity and function of the nuclear factor kappa B pathway.,Perkins ND.,Oncogene.,17072324,2006,10,30                                                                                                                   |
| MSK1_NFKB               | Transcriptional activation of the NF-kappaB p65 subunit by mitogen- and stress-activated protein kinase-1 (MSK1).,Vermeulen L, De Wilde G, Van Damme P, Vanden Berghe W, Haegeman G.,EMBO J.,12628924,2003,3,17                                                          |
| MSK1_NFKB_P1K           | Post-translational modifications regulating the activity and function of the nuclear factor kappa B pathway.,Perkins ND.,Oncogene.,17072324,2006,10,30                                                                                                                   |
| MSK1_NFKB_P1K           | Transcriptional activation of the NF-kappaB p65 subunit by mitogen- and stress-activated protein kinase-1 (MSK1).,Vermeulen L, De Wilde G, Van Damme P, Vanden Berghe W, Haegeman G.,EMBO J.,12628924,2003,3,17                                                          |
| MYD88_DIME              | Inhibition of MyD88 dimerization and recruitment of IRAK1 and IRAK4 by a novel peptidomimetic compound.,Loiarro M, Capolunghi F, Fantò N, Gallo G, Campo S, Arseni B, Carsetti R, Carminati P, De Santis R, Ruggiero V, Sette C.,J Leukoc Biol.,17548806,2007,6,4        |
| MYD88_DIME              | Structural complementarity of Toll/interleukin-1 receptor domains in Toll-like receptors and the adaptors Mal and MyD88.,Dunne A, Ejdeback M, Ludidi PL, O'Neill LA, Gay NJ.,J Biol Chem.,12888566,2003,10,17                                                            |
| MYD88_IRAK_TOLLIP_2PHOS | Sequential autophosphorylation steps in the interleukin-1 receptor-associated kinase-1 regulate its availability as an adapter in interleukin-1 signaling.,Kollewe C, Mackensen AC, Neumann D, Knop J, Cao P, Li S, Wesche H, Martin MU.,J Biol Chem.,14625308,2004,2,13 |
| MYD88_IRAK_TOLLIP_BIND  | Recruitment of IRAK to the interleukin 1 receptor complex requires interleukin 1 receptor accessory protein.,Huang J, Gao X, Li S, Cao Z.,Proc Natl Acad Sci USA.,9371760,1997,11,25                                                                                     |
| MYD88_IRAK_TOLLIP_BIND  | Tollip, a new component of the IL-1RI pathway, links IRAK to the IL-1 receptor.,Burns K, Clatworthy J, Martin L, Martinon F, Plumpton C, Maschera B, Lewis A, Ray K, Tschopp J, Volpe F.,Nat Cell Biol.,10854325,2000,6                                                  |
| MYD88_IRAK_TOLLIP DISS  | Negative regulation of toll-like receptor-mediated signaling by Tollip.,Zhang G, Ghosh S.,J Biol Chem.,11751856,2002,3,1                                                                                                                                                 |
| MYD88_IRAK_TOLLIP DISS  | Sequential autophosphorylation steps in the interleukin-1 receptor-associated kinase-1 regulate its availability as an adapter in interleukin-1 signaling.,Kollewe C, Mackensen AC, Neumann D, Knop J, Cao P, Li S, Wesche H, Martin MU.,J Biol Chem.,14625308,2004,2,13 |
| MYD88_IRAK_TOLLIP_PHOS  | IRAK-4: a novel member of the IRAK family with the properties of an IRAK-kinase.,Li S, Strelow A, Fontana EJ, Wesche H.,Proc Natl Acad Sci USA,11960013,2002,4,16                                                                                                        |
| MYD88_IRAK_TOLLIP_PHOS  | Sequential autophosphorylation steps in the interleukin-1 receptor-associated kinase-1 regulate its availability as an adapter in interleukin-1 signaling.,Kollewe C, Mackensen AC, Neumann D, Knop J, Cao P, Li S, Wesche H, Martin MU.,J Biol Chem.,14625308,2004,2,13 |
| MYD88_IRF7_BIND         | Interferon-alpha induction through Toll-like receptors involves a direct interaction of IRF7 with MyD88 and TRAF6.,Kawai T, Sato S, Ishii KJ, Coban C, Hemmi H, Yamamoto M, Terai K, Matsuda M, Inoue J, Uematsu S, Takeuchi O, Akira S.,Nat Immunol.,15361868,2004,10   |
| MYD88_IRF7_BIND         | TLR signaling.,Kawai T, Akira S.,Cell Death Differ.,16410796,2006,5                                                                                                                                                                                                      |

|                         |                                                                                                                                                                                                                                                                        |
|-------------------------|------------------------------------------------------------------------------------------------------------------------------------------------------------------------------------------------------------------------------------------------------------------------|
| MYD88_IRF7_BIND2        | Interferon-alpha induction through Toll-like receptors involves a direct interaction of IRF7 with MyD88 and TRAF6.,Kawai T, Sato S, Ishii KJ, Coban C, Hemmi H, Yamamoto M, Terai K, Matsuda M, Inoue J, Uematsu S, Takeuchi O, Akira S.,Nat Immunol.,15361868,2004,10 |
| MYD88_IRF7_BIND2        | TLR signaling.,Kawai T, Akira S.,Cell Death Differ.,16410796,2006,5                                                                                                                                                                                                    |
| MYD88_IRF7_BIND3        | Interferon-alpha induction through Toll-like receptors involves a direct interaction of IRF7 with MyD88 and TRAF6.,Kawai T, Sato S, Ishii KJ, Coban C, Hemmi H, Yamamoto M, Terai K, Matsuda M, Inoue J, Uematsu S, Takeuchi O, Akira S.,Nat Immunol.,15361868,2004,10 |
| MYD88_IRF7_BIND3        | TLR signaling.,Kawai T, Akira S.,Cell Death Differ.,16410796,2006,5                                                                                                                                                                                                    |
| MYD88_IRF7 DISS         | IRF family of transcription factors as regulators of host defense.,Taniguchi T, Ogasawara K, Takaoka A, Tanaka N.,Annu Rev Immunol.,11244049,2001                                                                                                                      |
| MYD88_IRF7 DISS         | Triggering the interferon antiviral response through an IKK-related pathway.,Sharma S, tenOever BR, Grandvaux N, Zhou GP, Lin R, Hiscott J.,Science.,12702806,2003,5,16                                                                                                |
| MYD88_IRF7 DISS2        | IRF family of transcription factors as regulators of host defense.,Taniguchi T, Ogasawara K, Takaoka A, Tanaka N.,Annu Rev Immunol.,11244049,2001                                                                                                                      |
| MYD88_IRF7 DISS2        | Triggering the interferon antiviral response through an IKK-related pathway.,Sharma S, tenOever BR, Grandvaux N, Zhou GP, Lin R, Hiscott J.,Science.,12702806,2003,5,16                                                                                                |
| MYD88_MYD88S_BIN D      | Modulation of Toll-interleukin 1 receptor mediated signaling.,Li X, Qin J.,J Mol Med.,15662540,2005,4                                                                                                                                                                  |
| MYD88_MYD88S_BIN D      | Negative regulation of toll-like receptor-mediated immune responses.,Liew FY, Xu D, Brint EK, O'Neill LA.,Nat Rev Immunol.,15928677,2005,6                                                                                                                             |
| NFKB(p105)_BTRCP2 _BIND | Shared pathways of IkappaB kinase-induced SCF(betaTrCP)-mediated ubiquitination and degradation for the NF-kappaB precursor p105 and IkappaBalpha.,Heissmeyer V, Krappmann D, Hatada EN, Scheidereit C.,Mol Cell Biol.,11158290,2001,2                                 |
| NFKB(p105)_BTRCP2 _BIND | Signaling to NF-kappaB.,Hayden MS, Ghosh S.,Genes Dev.,15371334,2004,9,15                                                                                                                                                                                              |
| NFKB(p105)_DEGR         | Shared pathways of IkappaB kinase-induced SCF(betaTrCP)-mediated ubiquitination and degradation for the NF-kappaB precursor p105 and IkappaBalpha.,Heissmeyer V, Krappmann D, Hatada EN, Scheidereit C.,Mol Cell Biol.,11158290,2001,2                                 |
| NFKB(p105)_DEGR         | Signaling to NF-kappaB.,Hayden MS, Ghosh S.,Genes Dev.,15371334,2004,9,15                                                                                                                                                                                              |
| NFKB(p105)_DEGR2        | Dual effects of IkappaB kinase beta-mediated phosphorylation on p105 Fate: SCF(beta-TrCP)-dependent degradation and SCF(beta-TrCP)-independent processing.,Cohen S, Achbert-Weiner H, Ciechanover A.,Mol Cell Biol.,14673179,2004,1                                    |
| NFKB(p105)_DEGR2        | Signaling to NF-kappaB.,Hayden MS, Ghosh S.,Genes Dev.,15371334,2004,9,15                                                                                                                                                                                              |
| NFKB(p105)_DEGR3        | Signaling to NF-kappaB.,Hayden MS, Ghosh S.,Genes Dev.,15371334,2004,9,15                                                                                                                                                                                              |
| NFKB(p105)_PROC         | Dual effects of IkappaB kinase beta-mediated phosphorylation on p105 Fate: SCF(beta-TrCP)-dependent degradation and SCF(beta-TrCP)-independent processing.,Cohen S, Achbert-Weiner H, Ciechanover A.,Mol Cell Biol.,14673179,2004,1                                    |
| NFKB(p105)_PROC         | Signaling to NF-kappaB.,Hayden MS, Ghosh S.,Genes Dev.,15371334,2004,9,15                                                                                                                                                                                              |
| NFKB(p105)_PROC2        | Signaling to NF-kappaB.,Hayden MS, Ghosh S.,Genes Dev.,15371334,2004,9,15                                                                                                                                                                                              |

|                        |                                                                                                                                                                                                                                                                                                                      |
|------------------------|----------------------------------------------------------------------------------------------------------------------------------------------------------------------------------------------------------------------------------------------------------------------------------------------------------------------|
| NFKB(p105)_UBCH5A_BIND | Dual effects of IkappaB kinase beta-mediated phosphorylation on p105 Fate: SCF(beta-TrCP)-dependent degradation and SCF(beta-TrCP)-independent processing.,Cohen S, Achbert-Weiner H, Ciechanover A.,Mol Cell Biol.,14673179,2004,1                                                                                  |
| NFKB(p105)_UBCH5A_BIND | Signaling to NF-kappaB.,Hayden MS, Ghosh S.,Genes Dev.,15371334,2004,9,15                                                                                                                                                                                                                                            |
| NFKB(p105)_UBIQ        | Shared pathways of IkappaB kinase-induced SCF(betaTrCP)-mediated ubiquitination and degradation for the NF-kappaB precursor p105 and IkappaBalpha.,Heissmeyer V, Krappmann D, Hatada EN, Scheidereit C.,Mol Cell Biol.,11158290,2001,2                                                                               |
| NFKB(p105)_UBIQ        | Signaling to NF-kappaB.,Hayden MS, Ghosh S.,Genes Dev.,15371334,2004,9,15                                                                                                                                                                                                                                            |
| NFKB(p105)_UBIQ2       | Dual effects of IkappaB kinase beta-mediated phosphorylation on p105 Fate: SCF(beta-TrCP)-dependent degradation and SCF(beta-TrCP)-independent processing.,Cohen S, Achbert-Weiner H, Ciechanover A.,Mol Cell Biol.,14673179,2004,1                                                                                  |
| NFKB(p105)_UBIQ2       | Signaling to NF-kappaB.,Hayden MS, Ghosh S.,Genes Dev.,15371334,2004,9,15                                                                                                                                                                                                                                            |
| NFKB(p105/p50)_BIND    | Processing of p105 is inhibited by docking of p50 active subunits to the ankyrin repeat domain, and inhibition is alleviated by signaling via the carboxyl-terminal phosphorylation/ ubiquitin-ligase binding domain.,Cohen S, Orian A, Ciechanover A.,J Biol Chem.,11350967,2001,7,20                               |
| NFKB(p105/p50)_BIND    | Regulation of NFKB1 proteins by the candidate oncoprotein BCL-3: generation of NF-kappaB homodimers from the cytoplasmic pool of p50-p105 and nuclear translocation.,Watanabe N, Iwamura T, Shinoda T, Fujita T.,EMBO J.,9218802,1997,6,16                                                                           |
| NFKB(p105/p50)_BIND    | Shared pathways of IkappaB kinase-induced SCF(betaTrCP)-mediated ubiquitination and degradation for the NF-kappaB precursor p105 and IkappaBalpha.,Heissmeyer V, Krappmann D, Hatada EN, Scheidereit C.,Mol Cell Biol.,11158290,2001,2                                                                               |
| NFKB(p105/p50)_DISS    | Regulation of NFKB1 proteins by the candidate oncoprotein BCL-3: generation of NF-kappaB homodimers from the cytoplasmic pool of p50-p105 and nuclear translocation.,Watanabe N, Iwamura T, Shinoda T, Fujita T.,EMBO J.,9218802,1997,6,16                                                                           |
| NFKB(p50)_BCL3_BIND    | NF-kappaB p105 is a target of IkappaB kinases and controls signal induction of Bcl-3-p50 complexes.,Heissmeyer V, Krappmann D, Wulczyn FG, Scheidereit C.,EMBO J.,10469655,1999,9,1                                                                                                                                  |
| NFKB(p50)_BCL3_BIND    | Regulation of NFKB1 proteins by the candidate oncoprotein BCL-3: generation of NF-kappaB homodimers from the cytoplasmic pool of p50-p105 and nuclear translocation.,Watanabe N, Iwamura T, Shinoda T, Fujita T.,EMBO J.,9218802,1997,6,16                                                                           |
| NFKB(p50)_BCL3_TRAN    | NF-kappaB p105 is a target of IkappaB kinases and controls signal induction of Bcl-3-p50 complexes.,Heissmeyer V, Krappmann D, Wulczyn FG, Scheidereit C.,EMBO J.,10469655,1999,9,1                                                                                                                                  |
| NFKB(p50)_BCL3_TRAN    | Regulation of NFKB1 proteins by the candidate oncoprotein BCL-3: generation of NF-kappaB homodimers from the cytoplasmic pool of p50-p105 and nuclear translocation.,Watanabe N, Iwamura T, Shinoda T, Fujita T.,EMBO J.,9218802,1997,6,16                                                                           |
| NFKB(p50)_IKBZ_BIND    | Regulation of Toll/IL-1-receptor-mediated gene expression by the inducible nuclear protein IkappaBzeta.,Yamamoto M, Yamazaki S, Uematsu S, Sato S, Hemmi H, Hoshino K, Kaisho T, Kuwata H, Takeuchi O, Takeshige K, Saitoh T, Yamaoka S, Yamamoto N, Yamamoto S, Muta T, Takeda K, Akira S.,Nature,15241416,2004,7,8 |



|                                 |                                                                                                                                                                                                                                              |
|---------------------------------|----------------------------------------------------------------------------------------------------------------------------------------------------------------------------------------------------------------------------------------------|
| NFKB(p50)_IKBZ_BIN<br>D         | Stimulus-specific induction of a novel nuclear factor-kappaB regulator, I kappa B-zeta, via Toll/Interleukin-1 receptor is mediated by mRNA stabilization., Yamazaki S, Muta T, Matsuo S, Takeshige K., J Biol Chem., 15522867, 2005, 1, 14  |
| NFKB(p50)_IMPA3_BI<br>ND        | NF- $\kappa$ B is transported into the nucleus by importin $\alpha$ 3 and importin $\alpha$ 4., Fagerlund R, Kinnunen L, Köhler M, Julkunen I, Melén K., J Biol Chem., 15677444, 2005, 4, 22                                                 |
| NFKB(p50)_IMPA3_DI<br>SS        | NF- $\kappa$ B is transported into the nucleus by importin $\alpha$ 3 and importin $\alpha$ 4., Fagerlund R, Kinnunen L, Köhler M, Julkunen I, Melén K., J Biol Chem., 15677444, 2005, 4, 22                                                 |
| NFKB(p50)_IMPA3_T<br>RAN        | NF- $\kappa$ B is transported into the nucleus by importin $\alpha$ 3 and importin $\alpha$ 4., Fagerlund R, Kinnunen L, Köhler M, Julkunen I, Melén K., J Biol Chem., 15677444, 2005, 4, 22                                                 |
| NFKB(p50)_KB_SITE_<br>BIND      | DNA binding of repressor nuclear factor-kappaB p50/p50 depends on phosphorylation of Ser337 by the protein kinase A catalytic subunit., Guan H, Hou S, Ricciardi RP., J Biol Chem., 15642694, 2005, 3, 18                                    |
| NFKB(p50)_KB_SITE_<br>BIND      | Molecular control of immune/inflammatory responses: interactions between nuclear factor-kappa B and steroid receptor-signaling pathways., McKay LI, Cidlowski JA., Endocr Rev., 10453354, 1999, 8                                            |
| NFKB(p50)_KB_SITE_<br>DISS      | Molecular control of immune/inflammatory responses: interactions between nuclear factor-kappa B and steroid receptor-signaling pathways., McKay LI, Cidlowski JA., Endocr Rev., 10453354, 1999, 8                                            |
| NFKB(p50/p65)_CBP-<br>5P3A_BIND | Post-activation turn-off of NF-kappa B-dependent transcription is regulated by acetylation of p65., Kiernan R, Brès V, Ng RW, Coudart MP, El Messaoudi S, Sardet C, Jin DY, Emiliani S, Benkirane M., J Biol Chem., 12419806, 2003, 1, 24    |
| NFKB(p50/p65)_CBP-<br>5P3A_BIND | Post-translational modifications regulating the activity and function of the nuclear factor kappa B pathway., Perkins ND., Oncogene., 17072324, 2006, 10, 30                                                                                 |
| NFKB(p50/p65)_CBP-<br>5P_BIND   | Acetylation of RelA at discrete sites regulates distinct nuclear functions of NF-kappaB., Chen LF, Mu Y, Greene WC., EMBO J., 12456660, 2002, 12, 2                                                                                          |
| NFKB(p50/p65)_CBP-<br>5P_BIND   | Post-translational modifications regulating the activity and function of the nuclear factor kappa B pathway., Perkins ND., Oncogene., 17072324, 2006, 10, 30                                                                                 |
| NFKB(p65)_DEGR                  | Regulation of NF-kappaB signaling by Pin1-dependent prolyl isomerization and ubiquitin-mediated proteolysis of p65/RelA., Ryo A, Suizu F, Yoshida Y, Perrem K, Liou YC, Wulf G, Rottapel R, Yamaoka S, Lu KP., Mol Cell., 14690596, 2003, 12 |
| NFKB(p65)_DEGR2                 | Degradation of promoter-bound p65/RelA is essential for the prompt termination of the nuclear factor kappaB response., Sacconi S, Marazzi I, Beg AA, Natoli G., J Exp Med., 15226358, 2004, 7, 5                                             |
| NFKB(p65)_SOCS1_B<br>IND        | Regulation of NF-kappaB signaling by Pin1-dependent prolyl isomerization and ubiquitin-mediated proteolysis of p65/RelA., Ryo A, Suizu F, Yoshida Y, Perrem K, Liou YC, Wulf G, Rottapel R, Yamaoka S, Lu KP., Mol Cell., 14690596, 2003, 12 |
| NFKB(p65)_UBIQ                  | Degradation of promoter-bound p65/RelA is essential for the prompt termination of the nuclear factor kappaB response., Sacconi S, Marazzi I, Beg AA, Natoli G., J Exp Med., 15226358, 2004, 7, 5                                             |
| NFKB_2ACTL                      | Post-activation turn-off of NF-kappa B-dependent transcription is regulated by acetylation of p65., Kiernan R, Brès V, Ng RW, Coudart MP, El Messaoudi S, Sardet C, Jin DY, Emiliani S, Benkirane M., J Biol Chem., 12419806, 2003, 1, 24    |
| NFKB_2ACTL                      | Post-translational modifications regulating the activity and function of the nuclear factor kappa B pathway., Perkins ND., Oncogene., 17072324, 2006, 10, 30                                                                                 |
| NFKB_3ACTL                      | Acetylation of RelA at discrete sites regulates distinct nuclear functions of NF-kappaB., Chen LF, Mu Y, Greene WC., EMBO J., 12456660, 2002, 12, 2                                                                                          |
| NFKB_3ACTL                      | Post-translational modifications regulating the activity and function of the nuclear factor kappa B pathway., Perkins ND., Oncogene., 17072324, 2006, 10, 30                                                                                 |

|                  |                                                                                                                                                                                                                                          |
|------------------|------------------------------------------------------------------------------------------------------------------------------------------------------------------------------------------------------------------------------------------|
| NFKB_3DACL       | Acetylation of RelA at discrete sites regulates distinct nuclear functions of NF-kappaB.,Chen LF, Mu Y, Greene WC.,EMBO J.,12456660,2002,12,2                                                                                            |
| NFKB_3DACL       | Duration of nuclear NF-kappaB action regulated by reversible acetylation.,Chen Lf , Fischle W, Verdin E, Greene WC.,Science.,11533489,2001,8,31                                                                                          |
| NFKB_3DACL       | Post-translational modifications regulating the activity and function of the nuclear factor kappa B pathway.,Perkins ND.,Oncogene.,17072324,2006,10,30                                                                                   |
| NFKB_5ACTL       | Post-activation turn-off of NF-kappa B-dependent transcription is regulated by acetylation of p65.,Kiernan R, Brès V, Ng RW, Coudart MP, El Messaoudi S, Sardet C, Jin DY, Emiliani S, Benkirane M.,J Biol Chem.,12419806,2003,1,24      |
| NFKB_5ACTL       | Post-translational modifications regulating the activity and function of the nuclear factor kappa B pathway.,Perkins ND.,Oncogene.,17072324,2006,10,30                                                                                   |
| NFKB_5DACL       | Post-activation turn-off of NF-kappa B-dependent transcription is regulated by acetylation of p65.,Kiernan R, Brès V, Ng RW, Coudart MP, El Messaoudi S, Sardet C, Jin DY, Emiliani S, Benkirane M.,J Biol Chem.,12419806,2003,1,24      |
| NFKB_5DACL       | Post-translational modifications regulating the activity and function of the nuclear factor kappa B pathway.,Perkins ND.,Oncogene.,17072324,2006,10,30                                                                                   |
| NFKB_CBP_KB_BIND | Acetylation of RelA at discrete sites regulates distinct nuclear functions of NF-kappaB.,Chen LF, Mu Y, Greene WC.,EMBO J.,12456660,2002,12,2                                                                                            |
| NFKB_CBP_KB_BIND | CREB-binding protein/p300 are transcriptional coactivators of p65.,Gerritsen ME, Williams AJ, Neish AS, Moore S, Shi Y, Collins T.,Proc Natl Acad Sci USA.,9096323,1997,4,1                                                              |
| NFKB_CBP_KB_BIND | Signaling to NF-kappaB.,Hayden MS, Ghosh S.,Genes Dev.,15371334,2004,9,15                                                                                                                                                                |
| NFKB_CBP_KB_BIND | Toll-like receptor-mediated cytokine production is differentially regulated by glycogen synthase kinase 3.,Martin M, Rehani K, Jope RS, Michalek SM.,Nat Immunol.,16007092,2005,8                                                        |
| NFKB_CBP_KB DISS | IKKalpha limits macrophage NF-kappaB activation and contributes to the resolution of inflammation.,Lawrence T, Bebien M, Liu GY, Nizet V, Karin M.,Nature.,15858576,2005,4,28                                                            |
| NFKB_IKBA_BIND   | Signaling to NF-kappaB.,Hayden MS, Ghosh S.,Genes Dev.,15371334,2004,9,15                                                                                                                                                                |
| NFKB_IKBA_BIND2  | Distinct functional properties of IkappaB alpha and IkappaB beta.,Tran K, Merika M, Thanos D.,Mol Cell Biol.,9271416,1997,9                                                                                                              |
| NFKB_IKBA_BIND2  | Nuclear localization of I kappa B alpha promotes active transport of NF-kappa B from the nucleus to the cytoplasm.,Arenzana-Seisdedos F, Turpin P, Rodriguez M, Thomas D, Hay RT, Virelizier JL, Dargemont C.,J Cell Sci.,9057089,1997,2 |
| NFKB_IKBA_BIND2  | Post-activation turn-off of NF-kappa B-dependent transcription is regulated by acetylation of p65.,Kiernan R, Brès V, Ng RW, Coudart MP, El Messaoudi S, Sardet C, Jin DY, Emiliani S, Benkirane M.,J Biol Chem.,12419806,2003,1,24      |
| NFKB_IKBA_BIND2  | Post-translational modifications regulating the activity and function of the nuclear factor kappa B pathway.,Perkins ND.,Oncogene.,17072324,2006,10,30                                                                                   |
| NFKB_IKBA_BIND3  | Nuclear localization of I kappa B alpha promotes active transport of NF-kappa B from the nucleus to the cytoplasm.,Arenzana-Seisdedos F, Turpin P, Rodriguez M, Thomas D, Hay RT, Virelizier JL, Dargemont C.,J Cell Sci.,9057089,1997,2 |
| NFKB_IKBA_BIND3  | Post-activation turn-off of NF-kappa B-dependent transcription is regulated by acetylation of p65.,Kiernan R, Brès V, Ng RW, Coudart MP, El Messaoudi S, Sardet C, Jin DY, Emiliani S, Benkirane M.,J Biol Chem.,12419806,2003,1,24      |
| NFKB_IKBA_BIND3  | Post-translational modifications regulating the activity and function of the nuclear factor kappa B pathway.,Perkins ND.,Oncogene.,17072324,2006,10,30                                                                                   |
| NFKB_IKBA_BIND4  | Nuclear localization of I kappa B alpha promotes active transport of NF-kappa B from the nucleus to the cytoplasm.,Arenzana-Seisdedos F, Turpin P, Rodriguez M, Thomas D, Hay RT, Virelizier JL, Dargemont C.,J Cell Sci.,9057089,1997,2 |

|                       |                                                                                                                                                                                                                                                                           |
|-----------------------|---------------------------------------------------------------------------------------------------------------------------------------------------------------------------------------------------------------------------------------------------------------------------|
| NFKB_IKBA_BIND4       | Post-activation turn-off of NF-kappa B-dependent transcription is regulated by acetylation of p65.,Kiernan R, Brès V, Ng RW, Coudart MP, El Messaoudi S, Sardet C, Jin DY, Emiliani S, Benkirane M.,J Biol Chem.,12419806,2003,1,24                                       |
| NFKB_IKBA_BIND4       | Post-translational modifications regulating the activity and function of the nuclear factor kappa B pathway.,Perkins ND.,Oncogene.,17072324,2006,10,30                                                                                                                    |
| NFKB_IKBA_BTRCP1_BIND | Impaired degradation of inhibitory subunit of NF-kappa B (I kappa B) and beta-catenin as a result of targeted disruption of the beta-TrCP1 gene.,Nakayama K, Hatakeyama S, Maruyama S, Kikuchi A, Onoé K, Good RA, Nakayama KI.,Proc Natl Acad Sci USA,12843402,2003,7,22 |
| NFKB_IKBA_BTRCP1_BIND | Missing pieces in the NF-kappaB puzzle.,Ghosh S, Karin M.,Cell.,11983155,2002,4                                                                                                                                                                                           |
| NFKB_IKBA_BTRCP2_BIND | Inducible degradation of IkappaBalpha by the proteasome requires interaction with the F-box protein h-betaTrCP.,Kroll M, Margottin F, Kohl A, Renard P, Durand H, Concordet JP, Bachelerie F, Arenzana-Seisdedos F, Benarous R.,J Biol Chem.,10075690,1999,3,19           |
| NFKB_IKBA_BTRCP2_BIND | Inhibition of NF-kappa-B cellular function via specific targeting of the I-kappa-B-ubiquitin ligase.,Yaron A, Gonen H, Alkalay I, Hatzubai A, Jung S, Beyth S, Mercurio F, Manning AM, Ciechanover A, Ben-Neriah Y.,EMBO J.,9351830,1998,11,3                             |
| NFKB_IKBA_BTRCP2_BIND | Signal-induced ubiquitination of IkappaBalpha by the F-box protein Slimb/beta-TrCP.,Spencer E, Jiang J, Chen ZJ.,Genes Dev.,9990853,1999,2,1                                                                                                                              |
| NFKB_IKBA_BTRCP2_BIND | beta-TrCP mediates the signal-induced ubiquitination of IkappaBbeta.,Wu C, Ghosh S.,J Biol Chem.,10514424,1999,10,15                                                                                                                                                      |
| NFKB_IKBA DISS        | Missing pieces in the NF-kappaB puzzle.,Ghosh S, Karin M.,Cell.,11983155,2002,4                                                                                                                                                                                           |
| NFKB_IKBA DISS        | Signaling to NF-kappaB.,Hayden MS, Ghosh S.,Genes Dev.,15371334,2004,9,15                                                                                                                                                                                                 |
| NFKB_IKBA_TRAN        | Missing pieces in the NF-kappaB puzzle.,Ghosh S, Karin M.,Cell.,11983155,2002,4                                                                                                                                                                                           |
| NFKB_IKBA_TRAN2       | Missing pieces in the NF-kappaB puzzle.,Ghosh S, Karin M.,Cell.,11983155,2002,4                                                                                                                                                                                           |
| NFKB_IKBA_TRAN3       | Missing pieces in the NF-kappaB puzzle.,Ghosh S, Karin M.,Cell.,11983155,2002,4                                                                                                                                                                                           |
| NFKB_IKBA_TRAN3       | Nuclear localization of I kappa B alpha promotes active transport of NF-kappa B from the nucleus to the cytoplasm.,Arenzana-Seisdedos F, Turpin P, Rodriguez M, Thomas D, Hay RT, Virelizier JL, Dargemont C.,J Cell Sci.,9057089,1997,2                                  |
| NFKB_IKBA_TRAN3       | Post-activation turn-off of NF-kappa B-dependent transcription is regulated by acetylation of p65.,Kiernan R, Brès V, Ng RW, Coudart MP, El Messaoudi S, Sardet C, Jin DY, Emiliani S, Benkirane M.,J Biol Chem.,12419806,2003,1,24                                       |
| NFKB_IKBA_TRAN3       | Post-translational modifications regulating the activity and function of the nuclear factor kappa B pathway.,Perkins ND.,Oncogene.,17072324,2006,10,30                                                                                                                    |
| NFKB_IKBA_TRAN4       | Nuclear localization of I kappa B alpha promotes active transport of NF-kappa B from the nucleus to the cytoplasm.,Arenzana-Seisdedos F, Turpin P, Rodriguez M, Thomas D, Hay RT, Virelizier JL, Dargemont C.,J Cell Sci.,9057089,1997,2                                  |
| NFKB_IKBA_TRAN4       | Post-activation turn-off of NF-kappa B-dependent transcription is regulated by acetylation of p65.,Kiernan R, Brès V, Ng RW, Coudart MP, El Messaoudi S, Sardet C, Jin DY, Emiliani S, Benkirane M.,J Biol Chem.,12419806,2003,1,24                                       |
| NFKB_IKBA_TRAN4       | Post-translational modifications regulating the activity and function of the nuclear factor kappa B pathway.,Perkins ND.,Oncogene.,17072324,2006,10,30                                                                                                                    |
| NFKB_IKBA_TRAN5       | Nuclear localization of I kappa B alpha promotes active transport of NF-kappa B from the nucleus to the cytoplasm.,Arenzana-Seisdedos F, Turpin P, Rodriguez M, Thomas D, Hay RT, Virelizier JL, Dargemont C.,J Cell Sci.,9057089,1997,2                                  |

|                       |                                                                                                                                                                                                                                                                |
|-----------------------|----------------------------------------------------------------------------------------------------------------------------------------------------------------------------------------------------------------------------------------------------------------|
| NFKB_IKBA_TRAN5       | Post-activation turn-off of NF-kappa B-dependent transcription is regulated by acetylation of p65.,Kiernan R, Brès V, Ng RW, Coudart MP, El Messaoudi S, Sardet C, Jin DY, Emiliani S, Benkirane M.,J Biol Chem.,12419806,2003,1,24                            |
| NFKB_IKBA_TRAN5       | Post-translational modifications regulating the activity and function of the nuclear factor kappa B pathway.,Perkins ND.,Oncogene.,17072324,2006,10,30                                                                                                         |
| NFKB_IKBA_UBCH5_BIND  | Inducible degradation of IkappaBalpha by the proteasome requires interaction with the F-box protein h-betaTrCP.,Kroll M, Margottin F, Kohl A, Renard P, Durand H, Concordet JP, Bachelier F, Arenzana-Seisdedos F, Benarous R.,J Biol Chem.,10075690,1999,3,19 |
| NFKB_IKBA_UBCH5_BIND  | Inhibition of NF-kappa-B cellular function via specific targeting of the I-kappa-B-ubiquitin ligase.,Yaron A, Gonen H, Alkalay I, Hatzubai A, Jung S, Beyth S, Mercurio F, Manning AM, Ciechanover A, Ben-Neriah Y.,EMBO J.,9351830,1998,11,3                  |
| NFKB_IKBA_UBCH5_BIND  | Signal-induced ubiquitination of IkappaBalpha by the F-box protein Slimb/beta-TrCP.,Spencer E, Jiang J, Chen ZJ.,Genes Dev.,9990853,1999,2,1                                                                                                                   |
| NFKB_IKBA_UBCH5_BIND  | beta-TrCP mediates the signal-induced ubiquitination of IkappaBbeta.,Wu C, Ghosh S.,J Biol Chem.,10514424,1999,10,15                                                                                                                                           |
| NFKB_IKBA_UBCH5_BIND2 | Missing pieces in the NF-kappaB puzzle.,Ghosh S, Karin M.,Cell.,11983155,2002,4                                                                                                                                                                                |
| NFKB_IKBB_BIND        | Signaling to NF-kappaB.,Hayden MS, Ghosh S.,Genes Dev.,15371334,2004,9,15                                                                                                                                                                                      |
| NFKB_IKBB_BIND2       | Basal phosphorylation of the PEST domain in the I(kappa)B(beta) regulates its functional interaction with the c-rel proto-oncogene product.,Chu ZL, McKinsey TA, Liu L, Qi X, Ballard DW.,Mol Cell Biol.,8887627,1996,9                                        |
| NFKB_IKBB_BIND2       | Distinct functional properties of IkappaB alpha and IkappaB beta.,Tran K, Merika M, Thanos D.,Mol Cell Biol.,9271416,1997,9                                                                                                                                    |
| NFKB_IKBB_BTRCP2_BIND | Inducible degradation of IkappaBalpha by the proteasome requires interaction with the F-box protein h-betaTrCP.,Kroll M, Margottin F, Kohl A, Renard P, Durand H, Concordet JP, Bachelier F, Arenzana-Seisdedos F, Benarous R.,J Biol Chem.,10075690,1999,3,19 |
| NFKB_IKBB_BTRCP2_BIND | Signal-induced ubiquitination of IkappaBalpha by the F-box protein Slimb/beta-TrCP.,Spencer E, Jiang J, Chen ZJ.,Genes Dev.,9990853,1999,2,1                                                                                                                   |
| NFKB_IKBB_BTRCP2_BIND | Signaling to NF-kappaB.,Hayden MS, Ghosh S.,Genes Dev.,15371334,2004,9,15                                                                                                                                                                                      |
| NFKB_IKBB_BTRCP2_BIND | beta-TrCP mediates the signal-induced ubiquitination of IkappaBbeta.,Wu C, Ghosh S.,J Biol Chem.,10514424,1999,10,15                                                                                                                                           |
| NFKB_IKBB_DISS        | Missing pieces in the NF-kappaB puzzle.,Ghosh S, Karin M.,Cell.,11983155,2002,4                                                                                                                                                                                |
| NFKB_IKBB_DISS        | Signaling to NF-kappaB.,Hayden MS, Ghosh S.,Genes Dev.,15371334,2004,9,15                                                                                                                                                                                      |
| NFKB_IKBB_TRAN        | Basal phosphorylation of the PEST domain in the I(kappa)B(beta) regulates its functional interaction with the c-rel proto-oncogene product.,Chu ZL, McKinsey TA, Liu L, Qi X, Ballard DW.,Mol Cell Biol.,8887627,1996,9                                        |
| NFKB_IKBB_TRAN        | Distinct functional properties of IkappaB alpha and IkappaB beta.,Tran K, Merika M, Thanos D.,Mol Cell Biol.,9271416,1997,9                                                                                                                                    |
| NFKB_P1_PHOS          | Essential role of RelA Ser311 phosphorylation by zetaPKC in NF-kappaB transcriptional activation.,Duran A, Diaz-Meco MT, Moscat J.,EMBO J.,12881425,2003,8,1                                                                                                   |
| NFKB_P1_PHOS          | IKKbeta phosphorylates p65 at S468 in transactivation domain 2.,Schwabe RF, Sakurai H.,FASEB J.,16046471,2005,10                                                                                                                                               |
| NFKB_P1_PHOS          | Inducible phosphorylation of NF-kappa B p65 at serine 468 by T cell costimulation is mediated by IKK epsilon.,Mattoli I, Geng H, Sebald A, Hodel M, Bucher C, Kracht M, Schmitz ML.,J Biol Chem.,16407239,2006,3,10                                            |

|              |                                                                                                                                                                                                                             |
|--------------|-----------------------------------------------------------------------------------------------------------------------------------------------------------------------------------------------------------------------------|
| NFKB_P1_PHOS | Phosphorylation of serine 468 by GSK-3beta negatively regulates basal p65 NF-kappaB activity.,Buss H, Dörrie A, Schmitz ML, Frank R, Livingstone M, Resch K, Kracht M.,J Biol Chem.,15465828,2004,11,26                     |
| NFKB_P1_PHOS | Post-translational modifications regulating the activity and function of the nuclear factor kappa B pathway.,Perkins ND.,Oncogene.,17072324,2006,10,30                                                                      |
| NFKB_P1_PHOS | TOO LONG: See PubMed ID,Buss H, Dörrie A, Schmitz ML, Hoffmann E, Resch K, Kracht M.,J Biol Chem.,15489227,2004,12,31                                                                                                       |
| NFKB_P1_PHOS | Tumor necrosis factor alpha-induced phosphorylation of RelA/p65 on Ser529 is controlled by casein kinase II.,Wang D, Westerheide SD, Hanson JL, Baldwin AS. ,J Biol Chem.,10938077,2000,10,20                               |
| NFKB_P2_PHOS | IKKbeta phosphorylates p65 at S468 in transactivaton domain 2.,Schwabe RF, Sakurai H. ,FASEB J.,16046471,2005,10                                                                                                            |
| NFKB_P2_PHOS | Inducible phosphorylation of NF-kappa B p65 at serine 468 by T cell costimulation is mediated by IKK epsilon.,Mattioli I, Geng H, Sebald A, Hodel M, Bucher C, Kracht M, Schmitz ML.,J Biol Chem.,16407239,2006,3,10        |
| NFKB_P2_PHOS | Phosphorylation of NF-kappa B p65 by PKA stimulates transcriptional activity by promoting a novel bivalent interaction with the coactivator CBP/p300.,Zhong H, Voll RE, Ghosh S.,Mol Cell.,9660950,1998,4                   |
| NFKB_P2_PHOS | Phosphorylation of serine 468 by GSK-3beta negatively regulates basal p65 NF-kappaB activity.,Buss H, Dörrie A, Schmitz ML, Frank R, Livingstone M, Resch K, Kracht M.,J Biol Chem.,15465828,2004,11,26                     |
| NFKB_P2_PHOS | Post-translational modifications regulating the activity and function of the nuclear factor kappa B pathway.,Perkins ND.,Oncogene.,17072324,2006,10,30                                                                      |
| NFKB_P2_PHOS | TOO LONG: See PubMed ID,Buss H, Dörrie A, Schmitz ML, Hoffmann E, Resch K, Kracht M.,J Biol Chem.,15489227,2004,12,31                                                                                                       |
| NFKB_P2_PHOS | The transcriptional activity of NF-kappaB is regulated by the IkappaB-associated PKAc subunit through a cyclic AMP-independent mechanism.,Zhong H, SuYang H, Erdjument-Bromage H, Tempst P, Ghosh S.,Cell.,9150141,1997,5,2 |
| NFKB_P2_PHOS | Transcriptional activation of the NF-kappaB p65 subunit by mitogen- and stress-activated protein kinase-1 (MSK1).,Vermeulen L, De Wilde G, Van Damme P, Vanden Berghe W, Haegeman G.,EMBO J.,12628924,2003,3,17             |
| NFKB_P2_PHOS | Tumor necrosis factor alpha-induced phosphorylation of RelA/p65 on Ser529 is controlled by casein kinase II.,Wang D, Westerheide SD, Hanson JL, Baldwin AS. ,J Biol Chem.,10938077,2000,10,20                               |
| NFKB_P3_PHOS | Essential role of RelA Ser311 phosphorylation by zetaPKC in NF-kappaB transcriptional activation.,Duran A, Diaz-Meco MT, Moscat J.,EMBO J.,12881425,2003,8,1                                                                |
| NFKB_P3_PHOS | IKKbeta phosphorylates p65 at S468 in transactivaton domain 2.,Schwabe RF, Sakurai H. ,FASEB J.,16046471,2005,10                                                                                                            |
| NFKB_P3_PHOS | Phosphorylation of NF-kappa B p65 by PKA stimulates transcriptional activity by promoting a novel bivalent interaction with the coactivator CBP/p300.,Zhong H, Voll RE, Ghosh S.,Mol Cell.,9660950,1998,4                   |
| NFKB_P3_PHOS | Post-translational modifications regulating the activity and function of the nuclear factor kappa B pathway.,Perkins ND.,Oncogene.,17072324,2006,10,30                                                                      |
| NFKB_P3_PHOS | TOO LONG: See PubMed ID,Buss H, Dörrie A, Schmitz ML, Hoffmann E, Resch K, Kracht M.,J Biol Chem.,15489227,2004,12,31                                                                                                       |
| NFKB_P3_PHOS | The transcriptional activity of NF-kappaB is regulated by the IkappaB-associated PKAc subunit through a cyclic AMP-independent mechanism.,Zhong H, SuYang H, Erdjument-Bromage H, Tempst P, Ghosh S.,Cell.,9150141,1997,5,2 |
| NFKB_P3_PHOS | Transcriptional activation of the NF-kappaB p65 subunit by mitogen- and stress-activated protein kinase-1 (MSK1).,Vermeulen L, De Wilde G, Van Damme P, Vanden Berghe W, Haegeman G.,EMBO J.,12628924,2003,3,17             |

|              |                                                                                                                                                                                                                             |
|--------------|-----------------------------------------------------------------------------------------------------------------------------------------------------------------------------------------------------------------------------|
| NFKB_P3_PHOS | Tumor necrosis factor alpha-induced phosphorylation of RelA/p65 on Ser529 is controlled by casein kinase II.,Wang D, Westerheide SD, Hanson JL, Baldwin AS. ,J Biol Chem.,10938077,2000,10,20                               |
| NFKB_P4_PHOS | Essential role of RelA Ser311 phosphorylation by zetaPKC in NF-kappaB transcriptional activation.,Duran A, Diaz-Meco MT, Moscat J.,EMBO J.,12881425,2003,8,1                                                                |
| NFKB_P4_PHOS | IKKbeta phosphorylates p65 at S468 in transactivation domain 2.,Schwabe RF, Sakurai H. ,FASEB J.,16046471,2005,10                                                                                                           |
| NFKB_P4_PHOS | Inducible phosphorylation of NF-kappa B p65 at serine 468 by T cell costimulation is mediated by IKK epsilon.,Mattioli I, Geng H, Sebald A, Hodel M, Bucher C, Kracht M, Schmitz ML.,J Biol Chem.,16407239,2006,3,10        |
| NFKB_P4_PHOS | Phosphorylation of NF-kappa B p65 by PKA stimulates transcriptional activity by promoting a novel bivalent interaction with the coactivator CBP/p300.,Zhong H, Voll RE, Ghosh S.,Mol Cell.,9660950,1998,4                   |
| NFKB_P4_PHOS | Phosphorylation of serine 468 by GSK-3beta negatively regulates basal p65 NF-kappaB activity.,Buss H, Dörrie A, Schmitz ML, Frank R, Livingstone M, Resch K, Kracht M.,J Biol Chem.,15465828,2004,11,26                     |
| NFKB_P4_PHOS | Post-translational modifications regulating the activity and function of the nuclear factor kappa B pathway.,Perkins ND.,Oncogene.,17072324,2006,10,30                                                                      |
| NFKB_P4_PHOS | TOO LONG: See PubMed ID,Buss H, Dörrie A, Schmitz ML, Hoffmann E, Resch K, Kracht M.,J Biol Chem.,15489227,2004,12,31                                                                                                       |
| NFKB_P4_PHOS | The transcriptional activity of NF-kappaB is regulated by the IkappaB-associated PKAc subunit through a cyclic AMP-independent mechanism.,Zhong H, SuYang H, Erdjument-Bromage H, Tempst P, Ghosh S.,Cell.,9150141,1997,5,2 |
| NFKB_P4_PHOS | Transcriptional activation of the NF-kappaB p65 subunit by mitogen- and stress-activated protein kinase-1 (MSK1).,Vermeulen L, De Wilde G, Van Damme P, Vanden Berghe W, Haegeman G.,EMBO J.,12628924,2003,3,17             |
| NFKB_P5_PHOS | Essential role of RelA Ser311 phosphorylation by zetaPKC in NF-kappaB transcriptional activation.,Duran A, Diaz-Meco MT, Moscat J.,EMBO J.,12881425,2003,8,1                                                                |
| NFKB_P5_PHOS | IKKbeta phosphorylates p65 at S468 in transactivation domain 2.,Schwabe RF, Sakurai H. ,FASEB J.,16046471,2005,10                                                                                                           |
| NFKB_P5_PHOS | Inducible phosphorylation of NF-kappa B p65 at serine 468 by T cell costimulation is mediated by IKK epsilon.,Mattioli I, Geng H, Sebald A, Hodel M, Bucher C, Kracht M, Schmitz ML.,J Biol Chem.,16407239,2006,3,10        |
| NFKB_P5_PHOS | Phosphorylation of NF-kappa B p65 by PKA stimulates transcriptional activity by promoting a novel bivalent interaction with the coactivator CBP/p300.,Zhong H, Voll RE, Ghosh S.,Mol Cell.,9660950,1998,4                   |
| NFKB_P5_PHOS | Phosphorylation of serine 468 by GSK-3beta negatively regulates basal p65 NF-kappaB activity.,Buss H, Dörrie A, Schmitz ML, Frank R, Livingstone M, Resch K, Kracht M.,J Biol Chem.,15465828,2004,11,26                     |
| NFKB_P5_PHOS | Post-translational modifications regulating the activity and function of the nuclear factor kappa B pathway.,Perkins ND.,Oncogene.,17072324,2006,10,30                                                                      |
| NFKB_P5_PHOS | The transcriptional activity of NF-kappaB is regulated by the IkappaB-associated PKAc subunit through a cyclic AMP-independent mechanism.,Zhong H, SuYang H, Erdjument-Bromage H, Tempst P, Ghosh S.,Cell.,9150141,1997,5,2 |
| NFKB_P5_PHOS | Transcriptional activation of the NF-kappaB p65 subunit by mitogen- and stress-activated protein kinase-1 (MSK1).,Vermeulen L, De Wilde G, Van Damme P, Vanden Berghe W, Haegeman G.,EMBO J.,12628924,2003,3,17             |
| NFKB_P5_PHOS | Tumor necrosis factor alpha-induced phosphorylation of RelA/p65 on Ser529 is controlled by casein kinase II.,Wang D, Westerheide SD, Hanson JL, Baldwin AS. ,J Biol Chem.,10938077,2000,10,20                               |

|                         |                                                                                                                                                                                                                                                                                                      |
|-------------------------|------------------------------------------------------------------------------------------------------------------------------------------------------------------------------------------------------------------------------------------------------------------------------------------------------|
| NFKB_PKAC DISS          | Signaling to NF-kappaB.,Hayden MS, Ghosh S.,Genes Dev.,15371334,2004,9,15                                                                                                                                                                                                                            |
| NFKB_PKAC_IKBA_BI<br>ND | The transcriptional activity of NF-kappaB is regulated by the IkappaB-associated PKAc subunit through a cyclic AMP-independent mechanism.,Zhong H, SuYang H, Erdjument-Bromage H, Tempst P, Ghosh S.,Cell.,9150141,1997,5,2                                                                          |
| NFKB_PKAC_IKBA_DI<br>SS | The transcriptional activity of NF-kappaB is regulated by the IkappaB-associated PKAc subunit through a cyclic AMP-independent mechanism.,Zhong H, SuYang H, Erdjument-Bromage H, Tempst P, Ghosh S.,Cell.,9150141,1997,5,2                                                                          |
| NFKB_PKAC_IKBB_BI<br>ND | The transcriptional activity of NF-kappaB is regulated by the IkappaB-associated PKAc subunit through a cyclic AMP-independent mechanism.,Zhong H, SuYang H, Erdjument-Bromage H, Tempst P, Ghosh S.,Cell.,9150141,1997,5,2                                                                          |
| NFKB_PKAC_IKBB_DI<br>SS | The transcriptional activity of NF-kappaB is regulated by the IkappaB-associated PKAc subunit through a cyclic AMP-independent mechanism.,Zhong H, SuYang H, Erdjument-Bromage H, Tempst P, Ghosh S.,Cell.,9150141,1997,5,2                                                                          |
| NFKB_TRAN               | Post-translational modifications regulating the activity and function of the nuclear factor kappa B pathway.,Perkins ND.,Oncogene.,17072324,2006,10,30                                                                                                                                               |
| NFKB_TRAN               | TLR signaling.,Kawai T, Akira S.,Cell Death Differ.,16410796,2006,5                                                                                                                                                                                                                                  |
| NFKB_TRAN               | TOO LONG: See pubmed ID,Sato S, Sugiyama M, Yamamoto M, Watanabe Y, Kawai T, Takeda K, Akira S.,J Immunol.,14530355,2003,10,15                                                                                                                                                                       |
| NFKB_TRAN               | Toll-like receptor function and signaling.,Kaisho T, Akira S.,J Allergy Clin Immunol.,16675322,2006,5                                                                                                                                                                                                |
| NFKB_TRAN               | Toll-like receptor signaling.,Akira S.,J Biol Chem.,12893815,2003,10,3                                                                                                                                                                                                                               |
| NOD1P_BIND              | An essential role for NOD1 in host recognition of bacterial peptidoglycan containing diaminopimelic acid.,Chamaillard M, Hashimoto M, Horie Y, Masumoto J, Qiu S, Saab L, Ogura Y, Kawasaki A, Fukase K, Kusumoto S, Valvano MA, Foster SJ, Mak TW, Nuñez G, Inohara N.,Nat Immunol.,12796777,2003,7 |
| NOD1P_BIND              | CATERPILLER: a novel gene family important in immunity, cell death, and diseases.,Ting JP, Davis BK.,Annu Rev Immunol.,15771576,2005                                                                                                                                                                 |
| NOD2P_BIND              | CATERPILLER: a novel gene family important in immunity, cell death, and diseases.,Ting JP, Davis BK.,Annu Rev Immunol.,15771576,2005                                                                                                                                                                 |
| NOD2P_BIND              | Nod2 is a general sensor of peptidoglycan through muramyl dipeptide (MDP) detection.,Girardin SE, Boneca IG, Viala J, Chamaillard M, Labigne A, Thomas G, Philpott DJ, Sansonetti PJ.,J Biol Chem.,12527755,2003,3,14                                                                                |
| NSF_EEA1_RAB5_BI<br>ND  | Oligomeric complexes link Rab5 effectors with NSF and drive membrane fusion via interactions between EEA1 and syntaxin 13.,McBride HM, Rybin V, Murphy C, Giner A, Teasdale R, Zerial M.,Cell.,10458612,1999,8,6                                                                                     |
| NSF_EEA1_RAB5_BI<br>ND  | Signal transduction pathways mediated by the interaction of CpG DNA with Toll-like receptor 9.,Takeshita F, Gursel I, Ishii KJ, Suzuki K, Gursel M, Klinman DM.,Semin Immunol.,14751759,2004,2                                                                                                       |
| NSF_STXN13_BIND         | Oligomeric complexes link Rab5 effectors with NSF and drive membrane fusion via interactions between EEA1 and syntaxin 13.,McBride HM, Rybin V, Murphy C, Giner A, Teasdale R, Zerial M.,Cell.,10458612,1999,8,6                                                                                     |
| PAK1_CDC42_BIND         | p21-activated kinases: three more join the Pak.,Jaffer ZM, Chernoff J.,Int J Biochem Cell Biol.,11950587,2002,7                                                                                                                                                                                      |
| PAK1_MAP2K1             | Cross-cascade activation of ERKs and ternary complex factors by Rho family proteins.,Frost JA, Steen H, Shapiro P, Lewis T, Ahn N, Shaw PE, Cobb MH.,EMBO J.,9351825,1997,11,3                                                                                                                       |
| PAK1_MAP2K1-2           | Cross-cascade activation of ERKs and ternary complex factors by Rho family proteins.,Frost JA, Steen H, Shapiro P, Lewis T, Ahn N, Shaw PE, Cobb MH.,EMBO J.,9351825,1997,11,3                                                                                                                       |

|                    |                                                                                                                                                                                                                                      |
|--------------------|--------------------------------------------------------------------------------------------------------------------------------------------------------------------------------------------------------------------------------------|
| PAK1_PHOS          | Identification of a central phosphorylation site in p21-activated kinase regulating autoinhibition and kinase activity.,Zenke FT, King CC, Bohl BP, Bokoch GM.,J Biol Chem.,10551809,1999,11,12                                      |
| PAK1_PHOS          | p21-activated kinases: three more join the Pak.,Jaffer ZM, Chernoff J.,Int J Biochem Cell Biol.,11950587,2002,7                                                                                                                      |
| PAK1_RAC1_BIND     | p21-activated kinases: three more join the Pak.,Jaffer ZM, Chernoff J.,Int J Biochem Cell Biol.,11950587,2002,7                                                                                                                      |
| PAK1_SRCK_RAF1     | Phosphorylation of Raf-1 by p21-activated kinase 1 and Src regulates Raf-1 autoinhibition.,Tran NH, Frost JA.,J Biol Chem.,12551923,2003,3,28                                                                                        |
| PAK1_SRCK_RAF1     | Positive and negative regulation of Raf kinase activity and function by phosphorylation.,Chong H, Lee J, Guan KL.,EMBO J.,11447113,2001,7,16                                                                                         |
| PAK1_SRCK_RAF1     | Untying the regulation of the Raf-1 kinase.,Dhillon AS, Kolch W.,Arch Biochem Biophys.,12127063,2002,8,1                                                                                                                             |
| PAK1_SRCK_RAF1-2   | Phosphorylation of Raf-1 by p21-activated kinase 1 and Src regulates Raf-1 autoinhibition.,Tran NH, Frost JA.,J Biol Chem.,12551923,2003,3,28                                                                                        |
| PAK1_SRCK_RAF1-2   | Positive and negative regulation of Raf kinase activity and function by phosphorylation.,Chong H, Lee J, Guan KL.,EMBO J.,11447113,2001,7,16                                                                                         |
| PAK1_SRCK_RAF1-2   | Untying the regulation of the Raf-1 kinase.,Dhillon AS, Kolch W.,Arch Biochem Biophys.,12127063,2002,8,1                                                                                                                             |
| PCASP8_PROC        | Autoproteolytic activation of pro-caspases by oligomerization.,Yang X, Chang HY, Baltimore D.,Mol Cell.,9659928,1998,1                                                                                                               |
| PCASP8_PROC        | Membrane oligomerization and cleavage activates the caspase-8 (FLICE/MACHalpha1) death signal.,Martin DA, Siegel RM, Zheng L, Lenardo MJ.,J Biol Chem.,9468483,1998,2,20                                                             |
| PCASP8_PROC        | The apoptotic signaling pathway activated by Toll-like receptor-2.,Aliprantis AO, Yang RB, Weiss DS, Godowski P, Zychlinsky A.,EMBO J.,10880445,2000,7,3                                                                             |
| PCASP9_NOD1P_BIN D | CATERPILLER: a novel gene family important in immunity, cell death, and diseases.,Ting JP, Davis BK.,Annu Rev Immunol.,15771576,2005                                                                                                 |
| PCASP9_NOD1P_BIN D | Nod1, an Apaf-1-like activator of caspase-9 and nuclear factor-kappaB.,Inohara N, Koseki T, del Peso L, Hu Y, Yee C, Chen S, Carrio R, Merino J, Liu D, Ni J, Núñez G.,J Biol Chem.,10329646,1999,5,21                               |
| PCASP9_NOD2P_BIN D | CATERPILLER: a novel gene family important in immunity, cell death, and diseases.,Ting JP, Davis BK.,Annu Rev Immunol.,15771576,2005                                                                                                 |
| PCASP9_NOD2P_BIN D | Nod1, an Apaf-1-like activator of caspase-9 and nuclear factor-kappaB.,Inohara N, Koseki T, del Peso L, Hu Y, Yee C, Chen S, Carrio R, Merino J, Liu D, Ni J, Núñez G.,J Biol Chem.,10329646,1999,5,21                               |
| PCASP9_PROC        | CATERPILLER: a novel gene family important in immunity, cell death, and diseases.,Ting JP, Davis BK.,Annu Rev Immunol.,15771576,2005                                                                                                 |
| PCASP9_PROC        | Nod1, an Apaf-1-like activator of caspase-9 and nuclear factor-kappaB.,Inohara N, Koseki T, del Peso L, Hu Y, Yee C, Chen S, Carrio R, Merino J, Liu D, Ni J, Núñez G.,J Biol Chem.,10329646,1999,5,21                               |
| PCASP9_PROC2       | CATERPILLER: a novel gene family important in immunity, cell death, and diseases.,Ting JP, Davis BK.,Annu Rev Immunol.,15771576,2005                                                                                                 |
| PCASP9_PROC2       | Nod1, an Apaf-1-like activator of caspase-9 and nuclear factor-kappaB.,Inohara N, Koseki T, del Peso L, Hu Y, Yee C, Chen S, Carrio R, Merino J, Liu D, Ni J, Núñez G.,J Biol Chem.,10329646,1999,5,21                               |
| PDK1_AKT           | Unravelling the activation mechanisms of protein kinase B/Akt.,Scheid MP, Woodgett JR.,FEBS Lett.,12829245,2003,7,3                                                                                                                  |
| PDK1_PHOS          | Phosphorylation of Ser-241 is essential for the activity of 3-phosphoinositide-dependent protein kinase-1: identification of five sites of phosphorylation in vivo.,Casamayor A, Morrice NA, Alessi DR.,Biochem J.,10455013,1999,9,1 |
| PDK1_PHOS          | Translocation of PDK-1 to the plasma membrane is important in allowing PDK-1 to activate protein kinase B.,Anderson KE, Coadwell J, Stephens LR, Hawkins PT.,Curr Biol.,9637919,1998,6,4                                             |



|                           |                                                                                                                                                                                                                                                          |
|---------------------------|----------------------------------------------------------------------------------------------------------------------------------------------------------------------------------------------------------------------------------------------------------|
| PDK1_PKCA                 | Intracellular signalling: PDK1--a kinase at the hub of things.,Belham C, Wu S, Avruch J.,Curr Biol.,10021376,1999,2,11                                                                                                                                   |
| PDK1_PKCA                 | New insights into the regulation of protein kinase C and novel phorbol ester receptors.,Ron D, Kazanietz MG.,FASEB J.,10506570,1999,10                                                                                                                   |
| PDK1_PKCA                 | Regulation of protein kinase C.,Newton AC.,Curr Opin Cell Biol.,9069266,1997,4                                                                                                                                                                           |
| PDK1_PKCB2                | Intracellular signalling: PDK1--a kinase at the hub of things.,Belham C, Wu S, Avruch J.,Curr Biol.,10021376,1999,2,11                                                                                                                                   |
| PDK1_PKCB2                | New insights into the regulation of protein kinase C and novel phorbol ester receptors.,Ron D, Kazanietz MG.,FASEB J.,10506570,1999,10                                                                                                                   |
| PDK1_PKCB2                | Regulation of protein kinase C.,Newton AC.,Curr Opin Cell Biol.,9069266,1997,4                                                                                                                                                                           |
| PDK1_PKCD                 | Intracellular signalling: PDK1--a kinase at the hub of things.,Belham C, Wu S, Avruch J.,Curr Biol.,10021376,1999,2,11                                                                                                                                   |
| PDK1_PKCD                 | New insights into the regulation of protein kinase C and novel phorbol ester receptors.,Ron D, Kazanietz MG.,FASEB J.,10506570,1999,10                                                                                                                   |
| PDK1_PKCD                 | Regulation of protein kinase C.,Newton AC.,Curr Opin Cell Biol.,9069266,1997,4                                                                                                                                                                           |
| PDK1_PKCZ                 | Further evidence that 3-phosphoinositide-dependent protein kinase-1 (PDK1) is required for the stability and phosphorylation of protein kinase C (PKC) isoforms.,Balendran A, Hare GR, Kieloch A, Williams MR, Alessi DR.,FEBS Lett.,11078882,2000,11,10 |
| PDK1_PKCZ                 | Protein kinase C isotypes controlled by phosphoinositide 3-kinase through the protein kinase PDK1.,Le Good JA, Ziegler WH, Parekh DB, Alessi DR, Cohen P, Parker PJ.,Science.,9748166,1998,9,25                                                          |
| PDK1_pail345p_hs_BI<br>ND | Translocation of PDK-1 to the plasma membrane is important in allowing PDK-1 to activate protein kinase B.,Anderson KE, Coadwell J, Stephens LR, Hawkins PT.,Curr Biol.,9637919,1998,6,4                                                                 |
| PHOX_GTP_BIND             | Phagocyte NADPH oxidase: a multicomponent enzyme essential for host defenses.,El-Benna J, Dang PM, Gougerot-Pocidallo MA, Elbim C.,Arch Immunol Ther Exp (Warsz).,15995580,2005,6                                                                        |
| PHOX_GTP_BIND             | Rac binding to p67(phox). Structural basis for interactions of the Rac1 effector region and insert region with components of the respiratory burst oxidase.,Nisimoto Y, Freeman JL, Motalebi SA, Hirshberg M, Lambeth JD.,J Biol Chem.,9228059,1997,7,25 |
| PHOX_GTP_BIND             | Rho GTPases and their effector proteins.,Bishop AL, Hall A.,Biochem J.,10816416,2000,6,1                                                                                                                                                                 |
| PHOX_GTP_BIND2            | Phagocyte NADPH oxidase: a multicomponent enzyme essential for host defenses.,El-Benna J, Dang PM, Gougerot-Pocidallo MA, Elbim C.,Arch Immunol Ther Exp (Warsz).,15995580,2005,6                                                                        |
| PHOX_GTP_BIND2            | Rac binding to p67(phox). Structural basis for interactions of the Rac1 effector region and insert region with components of the respiratory burst oxidase.,Nisimoto Y, Freeman JL, Motalebi SA, Hirshberg M, Lambeth JD.,J Biol Chem.,9228059,1997,7,25 |
| PHOX_GTP_BIND2            | Rho GTPases and their effector proteins.,Bishop AL, Hall A.,Biochem J.,10816416,2000,6,1                                                                                                                                                                 |
| PI34P5K_pail34p_hs        | Phosphoinositides and signal transduction.,Toker A.,Cell Mol Life Sci.,12088277,2002,5                                                                                                                                                                   |
| PI34P5K_pail34p_hs        | Synthesis and function of 3-phosphorylated inositol lipids.,Vanhaesebroeck B, Leever SJ, Ahmadi K, Timms J, Katso R, Driscoll PC, Woscholski R, Parker PJ, Waterfield MD.,Annu Rev Biochem.,11395417,2001                                                |
| PI3K1A_PHOS               | Activation of phosphoinositide 3-kinase activity by Cdc42Hs binding to p85.,Zheng Y, Bagrodia S, Cerione RA.,J Biol Chem.,8034624,1994,7,22                                                                                                              |

|                         |                                                                                                                                                                                                                                                                        |
|-------------------------|------------------------------------------------------------------------------------------------------------------------------------------------------------------------------------------------------------------------------------------------------------------------|
| PI3K1A_PHOS             | Novel roles of TLR3 tyrosine phosphorylation and PI3 kinase in double-stranded RNA signaling.,Sarkar SN, Peters KL, Elco CP, Sakamoto S, Pal S, Sen GC.,Nat Struct Mol Biol.,15502848,2004,11                                                                          |
| PI3K1A_PHOS             | Phosphatidylinositol 3-kinase is recruited to a specific site in the activated IL-1 receptor I.,Marmioli S, Bavelloni A, Faenza I, Sirri A, Ognibene A, Cenni V, Tsukada J, Koyama Y, Ruzzene M, Ferri A, Auron PE, Toker A, Maraldi NM.,FEBS Lett.,9821957,1998,10,30 |
| PI3K1A_PHOS             | Rac GTPase interacts specifically with phosphatidylinositol 3-kinase.,Bokoch GM, Vlahos CJ, Wang Y, Knaus UG, Traynor-Kaplan AE.,Biochem J.,8645157,1996,5,1                                                                                                           |
| PI3K1A_PHOS             | Rho family GTPases bind to phosphoinositide kinases.,Tolias KF, Cantley LC, Carpenter CL.,J Biol Chem.,7629060,1995,7,28                                                                                                                                               |
| PI3K1A_PHOS             | The IL-1 receptor accessory protein is essential for PI 3-kinase recruitment and activation.,Reddy SA, Lin YF, Huang HJ, Samanta AK, Liao WS.,Biochem Biophys Res Commun.,15044087,2004,4,16                                                                           |
| PI3K1A_pail45p_hs       | Phosphoinositides and signal transduction.,Toker A.,Cell Mol Life Sci.,12088277,2002,5                                                                                                                                                                                 |
| PI3K1A_pail45p_hs       | Synthesis and function of 3-phosphorylated inositol lipids.,Vanhaesebroeck B, Leever SJ, Ahmadi K, Timms J, Katso R, Driscoll PC, Woscholski R, Parker PJ, Waterfield MD.,Annu Rev Biochem.,11395417,2001                                                              |
| PI3K3_BIND              | Role of Rab5 in the recruitment of hVps34/p150 to the early endosome.,Murray JT, Panaretou C, Stenmark H, Miaczynska M, Backer JM.,Traffic.,12010460,2002,6                                                                                                            |
| PI3K3_RAB5_BIND         | Role of Rab5 in the recruitment of hVps34/p150 to the early endosome.,Murray JT, Panaretou C, Stenmark H, Miaczynska M, Backer JM.,Traffic.,12010460,2002,6                                                                                                            |
| PI3K3_RAB5_pail_hs_BIND | Phosphoinositide 3-kinases and the regulation of vesicular trafficking.,Backer JM.,Mol Cell Biol Res Commun.,10891392,2000,4                                                                                                                                           |
| PI3P4K_pail3p_hs        | Phosphoinositides and signal transduction.,Toker A.,Cell Mol Life Sci.,12088277,2002,5                                                                                                                                                                                 |
| PI3P4K_pail3p_hs        | Synthesis and function of 3-phosphorylated inositol lipids.,Vanhaesebroeck B, Leever SJ, Ahmadi K, Timms J, Katso R, Driscoll PC, Woscholski R, Parker PJ, Waterfield MD.,Annu Rev Biochem.,11395417,2001                                                              |
| PI4P5K_PHOS             | Phosphatidic acid is a specific activator of phosphatidylinositol-4-phosphate kinase.,Moritz A, De Graan PN, Gispén WH, Wirtz KW.,J Biol Chem.,1313792,1992,4,15                                                                                                       |
| PI4P5K_PHOS             | Rho GTPases and their effector proteins.,Bishop AL, Hall A.,Biochem J.,10816416,2000,6,1                                                                                                                                                                               |
| PI4P5K_PHOS             | Rho family GTPases bind to phosphoinositide kinases.,Tolias KF, Cantley LC, Carpenter CL.,J Biol Chem.,7629060,1995,7,28                                                                                                                                               |
| PI4P5K_pail4p_hs        | Phosphoinositides and signal transduction.,Toker A.,Cell Mol Life Sci.,12088277,2002,5                                                                                                                                                                                 |
| PI4P5K_pail4p_hs        | Synthesis and function of 3-phosphorylated inositol lipids.,Vanhaesebroeck B, Leever SJ, Ahmadi K, Timms J, Katso R, Driscoll PC, Woscholski R, Parker PJ, Waterfield MD.,Annu Rev Biochem.,11395417,2001                                                              |
| PKAC_NFKB               | Phosphorylation of NF-kappa B p65 by PKA stimulates transcriptional activity by promoting a novel bivalent interaction with the coactivator CBP/p300.,Zhong H, Voll RE, Ghosh S.,Mol Cell.,9660950,1998,4                                                              |
| PKAC_NFKB               | Post-translational modifications regulating the activity and function of the nuclear factor kappa B pathway.,Perkins ND.,Oncogene.,17072324,2006,10,30                                                                                                                 |
| PKAC_NFKB               | The transcriptional activity of NF-kappaB is regulated by the IkappaB-associated PKAc subunit through a cyclic AMP-independent mechanism.,Zhong H, SuYang H, Erdjument-Bromage H, Tempst P, Ghosh S.,Cell.,9150141,1997,5,2                                            |

|                            |                                                                                                                                                                                                                                                                       |
|----------------------------|-----------------------------------------------------------------------------------------------------------------------------------------------------------------------------------------------------------------------------------------------------------------------|
| PKAC_NFKB(p50)             | DNA binding of repressor nuclear factor-kappaB p50/p50 depends on phosphorylation of Ser337 by the protein kinase A catalytic subunit.,Guan H, Hou S, Ricciardi RP.,J Biol Chem.,15642694,2005,3,18                                                                   |
| PKAC_NFKB_P1K              | Phosphorylation of NF-kappa B p65 by PKA stimulates transcriptional activity by promoting a novel bivalent interaction with the coactivator CBP/p300.,Zhong H, Voll RE, Ghosh S.,Mol Cell.,9660950,1998,4                                                             |
| PKAC_NFKB_P1K              | Post-translational modifications regulating the activity and function of the nuclear factor kappa B pathway.,Perkins ND.,Oncogene.,17072324,2006,10,30                                                                                                                |
| PKAC_NFKB_P1K              | The transcriptional activity of NF-kappaB is regulated by the IkappaB-associated PKAc subunit through a cyclic AMP-independent mechanism.,Zhong H, SuYang H, Erdjument-Bromage H, Tempst P, Ghosh S.,Cell.,9150141,1997,5,2                                           |
| PKA_CREB                   | DNA binding and phosphorylation induce conformational alterations in the kinase inducible domain of CREB: Implications for the mechanism of CREB transcription function.,Sharma N, Lopez DI, Nyborg JK.,J Biol Chem.,17491014,2007,5,9                                |
| PKA_RAF1                   | Cyclic AMP-dependent kinase regulates Raf-1 kinase mainly by phosphorylation of serine 259.,Dhillon AS, Pollock C, Steen H, Shaw PE, Mischak H, Kolch W.,Mol Cell Biol.,11971957,2002,5                                                                               |
| PKA_RAF1                   | Untying the regulation of the Raf-1 kinase.,Dhillon AS, Kolch W.,Arch Biochem Biophys.,12127063,2002,8,1                                                                                                                                                              |
| PKCA_3PHOS                 | New insights into the regulation of protein kinase C and novel phorbol ester receptors.,Ron D, Kazanietz MG.,FASEB J.,10506570,1999,10                                                                                                                                |
| PKCA_ca2_BIND              | Ca2+ differentially regulates conventional protein kinase Cs' membrane interaction and activation.,Keranen LM, Newton AC.,J Biol Chem.,9325330,1997,10,10                                                                                                             |
| PKCA_ca2_BIND              | New insights into the regulation of protein kinase C and novel phorbol ester receptors.,Ron D, Kazanietz MG.,FASEB J.,10506570,1999,10                                                                                                                                |
| PKCA_ca2_BIND              | Regulation of protein kinase C.,Newton AC.,Curr Opin Cell Biol.,9069266,1997,4                                                                                                                                                                                        |
| PKCA_ca2_P47PHOX           | Phosphorylation of p47phox sites by PKC alpha, beta II, delta, and zeta: effect on binding to p22phox and on NADPH oxidase activation.,Fontayne A, Dang PM, Gougerot-Pocidalo MA, El-Benna J.,Biochemistry.,12056906,2002,6,18                                        |
| PKCA_ca2_P47PHOX           | Protein kinase C zeta phosphorylates a subset of selective sites of the NADPH oxidase component p47phox and participates in formyl peptide-mediated neutrophil respiratory burst.,Dang PM, Fontayne A, Hakim J, El Benna J, Périenin A.,J Immunol.,11145703,2001,1,15 |
| PKCA_dag_ps_hs_BI<br>ND    | New insights into the regulation of protein kinase C and novel phorbol ester receptors.,Ron D, Kazanietz MG.,FASEB J.,10506570,1999,10                                                                                                                                |
| PKCA_dag_ps_hs_BI<br>ND    | Regulation of protein kinase C.,Newton AC.,Curr Opin Cell Biol.,9069266,1997,4                                                                                                                                                                                        |
| PKCA_dag_ps_hs_P4<br>7PHOX | Phosphorylation of p47phox sites by PKC alpha, beta II, delta, and zeta: effect on binding to p22phox and on NADPH oxidase activation.,Fontayne A, Dang PM, Gougerot-Pocidalo MA, El-Benna J.,Biochemistry.,12056906,2002,6,18                                        |
| PKCA_dag_ps_hs_P4<br>7PHOX | Protein kinase C zeta phosphorylates a subset of selective sites of the NADPH oxidase component p47phox and participates in formyl peptide-mediated neutrophil respiratory burst.,Dang PM, Fontayne A, Hakim J, El Benna J, Périenin A.,J Immunol.,11145703,2001,1,15 |
| PKCB2_3PHOS                | New insights into the regulation of protein kinase C and novel phorbol ester receptors.,Ron D, Kazanietz MG.,FASEB J.,10506570,1999,10                                                                                                                                |
| PKCB2_ca2_BIND             | Ca2+ differentially regulates conventional protein kinase Cs' membrane interaction and activation.,Keranen LM, Newton AC.,J Biol Chem.,9325330,1997,10,10                                                                                                             |
| PKCB2_ca2_BIND             | New insights into the regulation of protein kinase C and novel phorbol ester receptors.,Ron D, Kazanietz MG.,FASEB J.,10506570,1999,10                                                                                                                                |

|                         |                                                                                                                                                                                                                                                                      |
|-------------------------|----------------------------------------------------------------------------------------------------------------------------------------------------------------------------------------------------------------------------------------------------------------------|
| PKCB2_ca2_BIND          | Regulation of protein kinase C.,Newton AC.,Curr Opin Cell Biol.,9069266,1997,4                                                                                                                                                                                       |
| PKCB2_ca2_P47PHOX       | Phosphorylation of p47phox sites by PKC alpha, beta II, delta, and zeta: effect on binding to p22phox and on NADPH oxidase activation.,Fontayne A, Dang PM, Gougerot-Pocidal MA, El-Benna J.,Biochemistry.,12056906,2002,6,18                                        |
| PKCB2_ca2_P47PHOX       | Protein kinase C zeta phosphorylates a subset of selective sites of the NADPH oxidase component p47phox and participates in formyl peptide-mediated neutrophil respiratory burst.,Dang PM, Fontayne A, Hakim J, El Benna J, Périain A.,J Immunol.,11145703,2001,1,15 |
| PKCB2_dag_ps_hs_BIND    | New insights into the regulation of protein kinase C and novel phorbol ester receptors.,Ron D, Kazanietz MG.,FASEB J.,10506570,1999,10                                                                                                                               |
| PKCB2_dag_ps_hs_BIND    | Regulation of protein kinase C.,Newton AC.,Curr Opin Cell Biol.,9069266,1997,4                                                                                                                                                                                       |
| PKCB2_dag_ps_hs_P47PHOX | Phosphorylation of p47phox sites by PKC alpha, beta II, delta, and zeta: effect on binding to p22phox and on NADPH oxidase activation.,Fontayne A, Dang PM, Gougerot-Pocidal MA, El-Benna J.,Biochemistry.,12056906,2002,6,18                                        |
| PKCB2_dag_ps_hs_P47PHOX | Protein kinase C zeta phosphorylates a subset of selective sites of the NADPH oxidase component p47phox and participates in formyl peptide-mediated neutrophil respiratory burst.,Dang PM, Fontayne A, Hakim J, El Benna J, Périain A.,J Immunol.,11145703,2001,1,15 |
| PKCD_2PHOS              | Identification of serine 643 of protein kinase C-delta as an important autophosphorylation site for its enzymatic activity.,Li W, Zhang J, Bottaro DP, Pierce JH.,J Biol Chem.,9305920,1997,9,26                                                                     |
| PKCD_2PHOS              | New insights into the regulation of protein kinase C and novel phorbol ester receptors.,Ron D, Kazanietz MG.,FASEB J.,10506570,1999,10                                                                                                                               |
| PKCD_dag_ps_hs_BIND     | New insights into the regulation of protein kinase C and novel phorbol ester receptors.,Ron D, Kazanietz MG.,FASEB J.,10506570,1999,10                                                                                                                               |
| PKCD_dag_ps_hs_BIND     | Regulation of protein kinase C.,Newton AC.,Curr Opin Cell Biol.,9069266,1997,4                                                                                                                                                                                       |
| PKCD_dag_ps_hs_P47PHOX  | Phosphorylation of p47phox sites by PKC alpha, beta II, delta, and zeta: effect on binding to p22phox and on NADPH oxidase activation.,Fontayne A, Dang PM, Gougerot-Pocidal MA, El-Benna J.,Biochemistry.,12056906,2002,6,18                                        |
| PKCD_dag_ps_hs_P47PHOX  | Protein kinase C zeta phosphorylates a subset of selective sites of the NADPH oxidase component p47phox and participates in formyl peptide-mediated neutrophil respiratory burst.,Dang PM, Fontayne A, Hakim J, El Benna J, Périain A.,J Immunol.,11145703,2001,1,15 |
| PKCZ_HNRNPA1            | Regulation of in vitro nucleic acid strand annealing activity of heterogeneous nuclear ribonucleoprotein protein A1 by reversible phosphorylation.,Idriss H, Kumar A, Casas-Finet JR, Guo H, Damuni Z, Wilson SH.,Biochemistry.,7727389,1994,9,20                    |
| PKCZ_NFKB               | Essential role of RelA Ser311 phosphorylation by zetaPKC in NF-kappaB transcriptional activation.,Duran A, Diaz-Meco MT, Moscat J.,EMBO J.,12881425,2003,8,1                                                                                                         |
| PKCZ_NFKB               | Post-translational modifications regulating the activity and function of the nuclear factor kappa B pathway.,Perkins ND.,Oncogene.,17072324,2006,10,30                                                                                                               |
| PKCZ_NFKB_P2K           | Essential role of RelA Ser311 phosphorylation by zetaPKC in NF-kappaB transcriptional activation.,Duran A, Diaz-Meco MT, Moscat J.,EMBO J.,12881425,2003,8,1                                                                                                         |
| PKCZ_NFKB_P2K           | Post-translational modifications regulating the activity and function of the nuclear factor kappa B pathway.,Perkins ND.,Oncogene.,17072324,2006,10,30                                                                                                               |
| PKCZ_P47PHOX            | Phosphorylation of p47phox sites by PKC alpha, beta II, delta, and zeta: effect on binding to p22phox and on NADPH oxidase activation.,Fontayne A, Dang PM, Gougerot-Pocidal MA, El-Benna J.,Biochemistry.,12056906,2002,6,18                                        |

|                 |                                                                                                                                                                                                                                                                                                                   |
|-----------------|-------------------------------------------------------------------------------------------------------------------------------------------------------------------------------------------------------------------------------------------------------------------------------------------------------------------|
| PKCZ_P47PHOX    | Protein kinase C zeta phosphorylates a subset of selective sites of the NADPH oxidase component p47phox and participates in formyl peptide-mediated neutrophil respiratory burst.,Dang PM, Fontayne A, Hakim J, El Benna J, Périani A.,J Immunol.,11145703,2001,1,15                                              |
| PKCZ_TRAN       | Nuclear import and export signals enable rapid nucleocytoplasmic shuttling of the atypical protein kinase C lambda.,Perander M, Bjorkoy G, Johansen T.,J Biol Chem.,11115515,2001,4,20                                                                                                                            |
| PKCZ_TRAN       | Protein kinase Czeta (PKCzeta): activation mechanisms and cellular functions.,Hirai T, Chida K.,J Biochem (Tokyo).,12761192,2003,1                                                                                                                                                                                |
| PKCZ_TRAN2      | Nuclear import and export signals enable rapid nucleocytoplasmic shuttling of the atypical protein kinase C lambda.,Perander M, Bjorkoy G, Johansen T.,J Biol Chem.,11115515,2001,4,20                                                                                                                            |
| PKCZ_TRAN2      | Protein kinase Czeta (PKCzeta): activation mechanisms and cellular functions.,Hirai T, Chida K.,J Biochem (Tokyo).,12761192,2003,1                                                                                                                                                                                |
| PKCZ_pa_hs_BIND | Phosphatidic acid activation of protein kinase C-zeta overexpressed in COS cells: comparison with other protein kinase C isotypes and other acidic lipids.,Limatola C, Schaap D, Moolenaar WH, van Blitterswijk WJ.,Biochem J.,7818462,1994,12,15                                                                 |
| PKCZ_pa_hs_PHOS | Phosphatidic acid activation of protein kinase C-zeta overexpressed in COS cells: comparison with other protein kinase C isotypes and other acidic lipids.,Limatola C, Schaap D, Moolenaar WH, van Blitterswijk WJ.,Biochem J.,7818462,1994,12,15                                                                 |
| PKCZ_ps_hs_BIND | Phosphatidic acid activation of protein kinase C-zeta overexpressed in COS cells: comparison with other protein kinase C isotypes and other acidic lipids.,Limatola C, Schaap D, Moolenaar WH, van Blitterswijk WJ.,Biochem J.,7818462,1994,12,15                                                                 |
| PKCZ_ps_hs_PHOS | Phosphatidic acid activation of protein kinase C-zeta overexpressed in COS cells: comparison with other protein kinase C isotypes and other acidic lipids.,Limatola C, Schaap D, Moolenaar WH, van Blitterswijk WJ.,Biochem J.,7818462,1994,12,15                                                                 |
| PKR_2PHOS       | Autophosphorylation in the activation loop is required for full kinase activity in vivo of human and yeast eukaryotic initiation factor 2alpha kinases PKR and GCN2.,Romano PR, Garcia-Barrio MT, Zhang X, Wang Q, Taylor DR, Zhang F, Herring C, Mathews MB, Qin J, Hinnebusch AG.,Mol Cell Biol.,9528799,1998,4 |
| PKR_2PHOS       | Binding of double-stranded RNA to protein kinase PKR is required for dimerization and promotes critical autophosphorylation events in the activation loop.,Zhang F, Romano PR, Nagamura-Inoue T, Tian B, Dever TE, Mathews MB, Ozato K, Hinnebusch AG.,J Biol Chem.,11337501,2001,7,6                             |
| PKR_DIME        | Autophosphorylation in the activation loop is required for full kinase activity in vivo of human and yeast eukaryotic initiation factor 2alpha kinases PKR and GCN2.,Romano PR, Garcia-Barrio MT, Zhang X, Wang Q, Taylor DR, Zhang F, Herring C, Mathews MB, Qin J, Hinnebusch AG.,Mol Cell Biol.,9528799,1998,4 |
| PKR_DIME        | Binding of double-stranded RNA to protein kinase PKR is required for dimerization and promotes critical autophosphorylation events in the activation loop.,Zhang F, Romano PR, Nagamura-Inoue T, Tian B, Dever TE, Mathews MB, Ozato K, Hinnebusch AG.,J Biol Chem.,11337501,2001,7,6                             |
| PKR_EIF2A       | Caspase-mediated cleavage of eukaryotic translation initiation factor subunit 2alpha.,Satoh S, Hijikata M, Handa H, Shimotohno K.,Biochem J.,10432301,1999,8,15                                                                                                                                                   |
| PKR_TRAF6_BIND  | TRAF family proteins link PKR with NF-kappa B activation.,Gil J, García MA, Gomez-Puertas P, Guerra S, Rullas J, Nakano H, Alcamí J, Esteban M.,Mol Cell Biol.,15121867,2004,5                                                                                                                                    |
| PLCB2_ACTI      | Stimulation of phospholipase C-beta2 by the Rho GTPases Cdc42Hs and Rac1.,Illenberger D, Schwald F, Pimmer D, Binder W, Maier G, Dietrich A, Gierschik P.,EMBO J.,9799233,1998,11,2                                                                                                                               |

|                          |                                                                                                                                                                                                                                                               |
|--------------------------|---------------------------------------------------------------------------------------------------------------------------------------------------------------------------------------------------------------------------------------------------------------|
| PLD_ACTI                 | Regulation of phospholipase D by protein kinase C is synergistic with ADP-ribosylation factor and independent of protein kinase activity.,Singer WD, Brown HA, Jiang X, Sternweis PC.,J Biol Chem.,8626805,1996,2,23                                          |
| PLD_ACTI                 | Rho GTPases and their effector proteins.,Bishop AL, Hall A.,Biochem J.,10816416,2000,6,1                                                                                                                                                                      |
| PLD_ACTI                 | RhoA-mediated Phospholipase D1 signaling is not required for the formation of stress fibers and focal adhesions.,Su W, Chardin P, Yamazaki M, Kanaho Y, Du G.,Cell Signal.,15993039,2006,4                                                                    |
| PLD_ACTI                 | The regulation of phospholipase D by inositol phospholipids and small GTPases.,Powner DJ, Wakelam MJ.,FEBS Lett.,12401204,2002,10,30                                                                                                                          |
| PP2A_DEPH                | Structure and regulation of MAPK phosphatases.,Farooq A, Zhou MM.,Cell Signal.,15115656,2004,7                                                                                                                                                                |
| PP2C_B1_MAP3K7IP_TRAF6   | Regulation of the TAK1 signaling pathway by protein phosphatase 2C.,Hanada M, Ninomiya-Tsuji J, Komaki K, Ohnishi M, Katsura K, Kanamaru R, Matsumoto K, Tamura S.,J Biol Chem.,11104763,2001,2,23                                                            |
| PP2C_E_MAP3K7IP_TRAF6    | Regulation of the interleukin-1-induced signaling pathways by a novel member of the protein phosphatase 2C family (PP2Cepsilon).,Li MG, Katsura K, Nomiyama H, Komaki K, Ninomiya-Tsuji J, Matsumoto K, Kobayashi T, Tamura S.,J Biol Chem.,12556533,2003,4,4 |
| PRE_IL1A_CALPN_3ca2_BIND | Differential sensitivity of interleukin-1 alpha and -beta precursor proteins to cleavage by calpain, a calcium-dependent protease.,Kavita U, Mizel SB.,J Biol Chem.,7499244,1995,11,17                                                                        |
| PRE_IL1A_CALPN_3ca2_BIND | Identification of calcium-activated neutral protease as a processing enzyme of human interleukin 1 alpha.,Kobayashi Y, Yamamoto K, Saido T, Kawasaki H, Oppenheim JJ, Matsushima K.,Proc Natl Acad Sci USA,2115174,1990,7                                     |
| PRE_IL1A_PROC            | Differential sensitivity of interleukin-1 alpha and -beta precursor proteins to cleavage by calpain, a calcium-dependent protease.,Kavita U, Mizel SB.,J Biol Chem.,7499244,1995,11,17                                                                        |
| PRE_IL1A_PROC            | Identification of calcium-activated neutral protease as a processing enzyme of human interleukin 1 alpha.,Kobayashi Y, Yamamoto K, Saido T, Kawasaki H, Oppenheim JJ, Matsushima K.,Proc Natl Acad Sci USA,2115174,1990,7                                     |
| PRE_IL1B_CASP1_BI ND     | A novel heterodimeric cysteine protease is required for interleukin-1 beta processing in monocytes.,Thornberry NA, Bull HG, Calaycay JR, Chapman KT, Howard AD, Kostura MJ, Miller DK, Molineaux SM, Weidner JR, Aunins J, et al.,Nature.,1574116,1992,4,30   |
| PRE_IL1B_CASP1_BI ND     | Identification of a monocyte specific pre-interleukin 1 beta convertase activity.,Kostura MJ, Tocci MJ, Limjuco G, Chin J, Cameron P, Hillman AG, Chartrain NA, Schmidt JA.,Proc Natl Acad Sci USA.,2787508,1989,7                                            |
| PRE_IL1B_PROC            | A novel heterodimeric cysteine protease is required for interleukin-1 beta processing in monocytes.,Thornberry NA, Bull HG, Calaycay JR, Chapman KT, Howard AD, Kostura MJ, Miller DK, Molineaux SM, Weidner JR, Aunins J, et al.,Nature.,1574116,1992,4,30   |
| PRE_IL1B_PROC            | Identification of a monocyte specific pre-interleukin 1 beta convertase activity.,Kostura MJ, Tocci MJ, Limjuco G, Chin J, Cameron P, Hillman AG, Chartrain NA, Schmidt JA.,Proc Natl Acad Sci USA.,2787508,1989,7                                            |
| RAB5_PHOS                | Functional synergy between Rab5 effector Rabaptin-5 and exchange factor Rabex-5 when physically associated in a complex.,Lippé R, Miaczynska M, Rybin V, Runge A, Zerial M.,Mol Biol Cell.,11452015,2001,7                                                    |
| RAB5_RBPTIN5_RBX5_BIND   | Functional synergy between Rab5 effector Rabaptin-5 and exchange factor Rabex-5 when physically associated in a complex.,Lippé R, Miaczynska M, Rybin V, Runge A, Zerial M.,Mol Biol Cell.,11452015,2001,7                                                    |
| RAC1_DEPH                | Phosphotyrosine-dependent activation of Rac-1 GDP/GTP exchange by the vav proto-oncogene product.,Crespo P, Schuebel KE, Ostrom AA, Gutkind JS, Bustelo XR.,Nature.,8990121,1997,1,9                                                                          |

|                    |                                                                                                                                                                                                                                                                                                                             |
|--------------------|-----------------------------------------------------------------------------------------------------------------------------------------------------------------------------------------------------------------------------------------------------------------------------------------------------------------------------|
| RAC1_PHOS          | Phosphotyrosine-dependent activation of Rac-1 GDP/GTP exchange by the vav proto-oncogene product.,Crespo P, Schuebel KE, Ostrom AA, Gutkind JS, Bustelo XR.,Nature.,8990121,1997,1,9                                                                                                                                        |
| RAC1_VAV1_BIND     | Phosphotyrosine-dependent activation of Rac-1 GDP/GTP exchange by the vav proto-oncogene product.,Crespo P, Schuebel KE, Ostrom AA, Gutkind JS, Bustelo XR.,Nature.,8990121,1997,1,9                                                                                                                                        |
| RAF1_DEPH1         | Protein phosphatase 2A positively regulates Ras signaling by dephosphorylating KSR1 and Raf-1 on critical 14-3-3 binding sites.,Ory S, Zhou M, Conrads TP, Veenstra TD, Morrison DK.,Curr Biol.,12932319,2003,8,19                                                                                                          |
| RAF1_DEPH1         | Untying the regulation of the Raf-1 kinase.,Dhillon AS, Kolch W.,Arch Biochem Biophys.,12127063,2002,8,1                                                                                                                                                                                                                    |
| RAF1_DEPH2         | Protein phosphatase 2A positively regulates Ras signaling by dephosphorylating KSR1 and Raf-1 on critical 14-3-3 binding sites.,Ory S, Zhou M, Conrads TP, Veenstra TD, Morrison DK.,Curr Biol.,12932319,2003,8,19                                                                                                          |
| RAF1_DEPH2         | Untying the regulation of the Raf-1 kinase.,Dhillon AS, Kolch W.,Arch Biochem Biophys.,12127063,2002,8,1                                                                                                                                                                                                                    |
| RAS_DEPH           | Human RAS superfamily proteins and related GTPases.,Colicelli J.,Sci STKE.,15367757,2004,9,7                                                                                                                                                                                                                                |
| RAS_GTP_RAF1_BIN D | Phosphorylation and regulation of Raf by Akt (protein kinase B).,Zimmermann S, Moelling K.,Science.,10576742,1999,11,26                                                                                                                                                                                                     |
| RAS_GTP_RAF1_BIN D | Untying the regulation of the Raf-1 kinase.,Dhillon AS, Kolch W.,Arch Biochem Biophys.,12127063,2002,8,1                                                                                                                                                                                                                    |
| RAS_GTP_RIN1_BIN D | A human protein selected for interference with Ras function interacts directly with Ras and competes with Raf1.,Han L, Colicelli J.,Mol Cell Biol.,7862125,1995,3                                                                                                                                                           |
| RAS_GTP_RIN1_BIN D | The RAS effector RIN1 directly competes with RAF and is regulated by 14-3-3 proteins.,Wang Y, Waldron RT, Dhaka A, Patel A, Riley MM, Rozengurt E, Colicelli J.,Mol Cell Biol.,11784866,2002,2                                                                                                                              |
| RAS_PHOS           | Human RAS superfamily proteins and related GTPases.,Colicelli J.,Sci STKE.,15367757,2004,9,7                                                                                                                                                                                                                                |
| RAS_PHOS           | Ras participates in CpG oligodeoxynucleotide signaling through association with toll-like receptor 9 and promotion of interleukin-1 receptor-associated kinase/tumor necrosis factor receptor-associated factor 6 complex formation in macrophages.,Xu H, An H, Yu Y, Zhang M, Qi R, Cao X.,J Biol Chem.,12867418,2003,9,19 |
| RBPTIN5_RBX5_BIN D | Functional synergy between Rab5 effector Rabaptin-5 and exchange factor Rabex-5 when physically associated in a complex.,Lippé R, Miaczynska M, Rybin V, Runge A, Zerial M.,Mol Biol Cell.,11452015,2001,7                                                                                                                  |
| RHOA_PHOS          | The IL-1 receptor and Rho directly associate to drive cell activation in inflammation.,Singh R, Wang B, Shirvaikar A, Khan S, Kamat S, Schelling JR, Konieczkowski M, Sedor JR.,J Clin Invest.,10359565,1999,6                                                                                                              |
| RHOA_PHOS          | The low molecular weight GTPase RhoA and atypical protein kinase Czeta are required for TLR2-mediated gene transcription.,Teusch N, Lombardo E, Eddleston J, Knaus UG.,J Immunol.,15210811,2004,7,1                                                                                                                         |
| RIP1_TICAM1P_BIND  | RIP1 is an essential mediator of Toll-like receptor 3-induced NF-kappa B activation.,Meylan E, Burns K, Hofmann K, Blancheteau V, Martinon F, Kelliher M, Tschopp J.,Nat Immunol.,15064760,2004,5                                                                                                                           |
| RIP1_TICAM1P_BIND  | TOO LONG: See pubmed ID,Sato S, Sugiyama M, Yamamoto M, Watanabe Y, Kawai T, Takeda K, Akira S.,J Immunol.,14530355,2003,10,15                                                                                                                                                                                              |
| RIP2_NOD1P_BIND    | CATERPILLER: a novel gene family important in immunity, cell death, and diseases.,Ting JP, Davis BK.,Annu Rev Immunol.,15771576,2005                                                                                                                                                                                        |

|                          |                                                                                                                                                                                                                                                                   |
|--------------------------|-------------------------------------------------------------------------------------------------------------------------------------------------------------------------------------------------------------------------------------------------------------------|
| RIP2_NOD1P_BIND          | Nod1, an Apaf-1-like activator of caspase-9 and nuclear factor-kappaB.,Inohara N, Koseki T, del Peso L, Hu Y, Yee C, Chen S, Carrio R, Merino J, Liu D, Ni J, Núñez G.,J Biol Chem.,10329646,1999,5,21                                                            |
| RIP2_NOD2P_BIND          | CATERPILLER: a novel gene family important in immunity, cell death, and diseases.,Ting JP, Davis BK.,Annu Rev Immunol.,15771576,2005                                                                                                                              |
| RIP2_NOD2P_BIND          | Nod2, a Nod1/Apaf-1 family member that is restricted to monocytes and activates NF-kappaB.,Ogura Y, Inohara N, Benito A, Chen FF, Yamaoka S, Nunez G.,J Biol Chem.,11087742,2001,2,16                                                                             |
| RIP2_TRIP6_NOD1P_BIND    | TRIP6 is a RIP2-associated common signaling component of multiple NF-kappaB activation pathways.,Li L, Bin LH, Li F, Liu Y, Chen D, Zhai Z, Shu HB.,J Cell Sci.,15657077,2005,2,1                                                                                 |
| RIP2_TRIP6_TRAF2_BIND    | TRIP6 is a RIP2-associated common signaling component of multiple NF-kappaB activation pathways.,Li L, Bin LH, Li F, Liu Y, Chen D, Zhai Z, Shu HB.,J Cell Sci.,15657077,2005,2,1                                                                                 |
| RKIP_MAP3K14_BIND        | Raf kinase inhibitor protein interacts with NF-kappaB-inducing kinase and TAK1 and inhibits NF-kappaB activation.,Yeung KC, Rose DW, Dhillon AS, Yaros D, Gustafsson M, Chatterjee D, McFerran B, Wyche J, Kolch W, Sedivy JM.,Mol Cell Biol.,11585904,2001,11    |
| RKIP_MAP3K7IP_TRAF6_BIND | Raf kinase inhibitor protein interacts with NF-kappaB-inducing kinase and TAK1 and inhibits NF-kappaB activation.,Yeung KC, Rose DW, Dhillon AS, Yaros D, Gustafsson M, Chatterjee D, McFerran B, Wyche J, Kolch W, Sedivy JM.,Mol Cell Biol.,11585904,2001,11    |
| SGK_MAP3K3               | Inhibition of mitogen-activated kinase kinase kinase 3 activity through phosphorylation by the serum- and glucocorticoid-induced kinase 1.,Chun J, Kwon T, Kim DJ, Park I, Chung G, Lee EJ, Hong SK, Chang SI, Kim HY, Kang SS.,J Biochem (Tokyo),12761204,2003,1 |
| SIGIRR_DIME              | Modulation of Toll-interleukin 1 receptor mediated signaling.,Li X, Qin J.,J Mol Med.,15662540,2005,4                                                                                                                                                             |
| SIGIRR_DIME              | SIGIRR, a negative regulator of Toll-like receptor-interleukin 1 receptor signaling.,Wald D, Qin J, Zhao Z, Qian Y, Naramura M, Tian L, Towne J, Sims JE, Stark GR, Li X.,Nat Immunol.,12925853,2003,9                                                            |
| SQSTM1_PKCZ_BIND         | Localization of atypical protein kinase C isoforms into lysosome-targeted endosomes through interaction with p62.,Sanchez P, De Carcer G, Sandoval IV, Moscat J, Diaz-Meco MT.,Mol Cell Biol.,9566925,1998,5                                                      |
| SRCK_BTK                 | Bruton's tyrosine kinase (Btk)-the critical tyrosine kinase in LPS signalling?,Jefferies CA, O'Neill LA.,Immunol Lett.,15081522,2004,3,29                                                                                                                         |
| SRCK_BTK                 | Transphosphorylation of Bruton's tyrosine kinase on tyrosine 551 is critical for B cell antigen receptor function.,Kurosaki T, Kurosaki M.,J Biol Chem.,9188445,1997,6,20                                                                                         |
| SRCK_CBL                 | Inhibition of Src family kinases blocks epidermal growth factor (EGF)-induced activation of Akt, phosphorylation of c-Cbl, and ubiquitination of the EGF receptor.,Kassenbrock CK, Hunter S, Garl P, Johnson GL, Anderson SM.,J Biol Chem.,11994282,2002,7,12     |
| SRCK_CBL                 | Molecular complexes that contain both c-Cbl and c-Src associate with Golgi membranes.,Bard F, Patel U, Levy JB, Jurdic P, Home WC, Baron R.,Eur J Cell Biol.,11893076,2002,1                                                                                      |
| SRCK_PHOS                | Activation of src-family tyrosine kinases by LPS regulates cytokine production in dendritic cells by controlling AP-1 formation.,Napolitani G, Bortoletto N, Racioppi L, Lanzavecchia A, D'Oro U.,Eur J Immunol.,14515267,2003,10                                 |
| SRCK_PHOS                | Lipopolysaccharide (LPS)-induced macrophage activation and signal transduction in the absence of Src-family kinases Hck, Fgr, and Lyn.,Meng F, Lowell CA.,J Exp Med.,9151903,1997,5,5                                                                             |



|                     |                                                                                                                                                                                                                                                                                                                             |
|---------------------|-----------------------------------------------------------------------------------------------------------------------------------------------------------------------------------------------------------------------------------------------------------------------------------------------------------------------------|
| SRCK_PHOS           | The regulation of the expression of inducible nitric oxide synthase by Src-family tyrosine kinases mediated through MyD88-independent signaling pathways of Toll-like receptor 4.,Lee JY, Lowell CA, Lemay DG, Youn HS, Rhee SH, Sohn KH, Jang B, Ye J, Chung JH, Hwang DH., <i>Biochem Pharmacol.</i> ,16140274,2005,10,15 |
| SRTK_PHOS           | Role of vav1- and src-related tyrosine kinases in macrophage activation by CpG DNA.,Stovall SH, Yi AK, Meals EA, Talati AJ, Godambe SA, English BK., <i>J Biol Chem.</i> ,14749335,2004,4,2                                                                                                                                 |
| SRTK_VAV1           | Role of vav1- and src-related tyrosine kinases in macrophage activation by CpG DNA.,Stovall SH, Yi AK, Meals EA, Talati AJ, Godambe SA, English BK., <i>J Biol Chem.</i> ,14749335,2004,4,2                                                                                                                                 |
| ST2L_TIRAP_BIND     | A novel negative regulator for IL-1 receptor and Toll-like receptor 4.,Liew FY, Liu H, Xu D., <i>Immunol Lett.</i> ,15585304,2005,1,15                                                                                                                                                                                      |
| ST2L_TIRAP_BIND     | Modulation of Toll-interleukin 1 receptor mediated signaling.,Li X, Qin J., <i>J Mol Med.</i> ,15662540,2005,4                                                                                                                                                                                                              |
| ST2L_TIRAP_BIND     | Negative regulation of toll-like receptor-mediated immune responses.,Liew FY, Xu D, Brint EK, O'Neill LA., <i>Nat Rev Immunol.</i> ,15928677,2005,6                                                                                                                                                                         |
| ST2L_TIRAP_BIND     | ST2 is an inhibitor of interleukin 1 receptor and Toll-like receptor 4 signaling and maintains endotoxin tolerance.,Brint EK, Xu D, Liu H, Dunne A, McKenzie AN, O'Neill LA, Liew FY., <i>Nat Immunol.</i> ,15004556,2004,4                                                                                                 |
| STLR2/L_SCD14_BIN D | Negative regulation of toll-like receptor-mediated immune responses.,Liew FY, Xu D, Brint EK, O'Neill LA., <i>Nat Rev Immunol.</i> ,15928677,2005,6                                                                                                                                                                         |
| STLR2/L_SCD14_BIN D | Soluble forms of Toll-like receptor (TLR)2 capable of modulating TLR2 signaling are present in human plasma and breast milk.,LeBouder E, Rey-Nores JE, Rushmere NK, Grigorov M, Lawn SD, Affolter M, Griffin GE, Ferrara P, Schiffrin EJ, Morgan BP, Labéta MO., <i>J Immunol.</i> ,14662871,2003,12,15                     |
| STLR2/L_SCD14_BIN D | The extracellular toll-like receptor 2 domain directly binds peptidoglycan derived from <i>Staphylococcus aureus</i> .,Iwaki D, Mitsuzawa H, Murakami S, Sano H, Konishi M, Akino T, Kuroki Y., <i>J Biol Chem.</i> ,11986301,2002,7,5                                                                                      |
| STLR2_CD14_BIND     | Negative regulation of toll-like receptor-mediated immune responses.,Liew FY, Xu D, Brint EK, O'Neill LA., <i>Nat Rev Immunol.</i> ,15928677,2005,6                                                                                                                                                                         |
| STLR4_BIND          | Interaction of soluble form of recombinant extracellular TLR4 domain with MD-2 enables lipopolysaccharide binding and attenuates TLR4-mediated signaling.,Hyakushima N, Mitsuzawa H, Nishitani C, Sano H, Kuronuma K, Konishi M, Himi T, Miyake K, Kuroki Y., <i>J Immunol.</i> ,15557191,2004,12,1                         |
| STLR4_MD2_BIND      | Interaction of soluble form of recombinant extracellular TLR4 domain with MD-2 enables lipopolysaccharide binding and attenuates TLR4-mediated signaling.,Hyakushima N, Mitsuzawa H, Nishitani C, Sano H, Kuronuma K, Konishi M, Himi T, Miyake K, Kuroki Y., <i>J Immunol.</i> ,15557191,2004,12,1                         |
| TBK1_IRF3           | A20 is a negative regulator of IFN regulatory factor 3 signaling.,Saitoh T, Yamamoto M, Miyagishi M, Taira K, Nakanishi M, Fujita T, Akira S, Yamamoto N, Yamaoka S., <i>J Immunol.</i> ,15661910,2005,2,1                                                                                                                  |
| TBK1_IRF3           | IKKepsilon and TBK1 are essential components of the IRF3 signaling pathway.,Fitzgerald KA, McWhirter SM, Faia KL, Rowe DC, Latz E, Golenbock DT, Coyle AJ, Liao SM, Maniatis T., <i>Nat Immunol.</i> ,12692549,2003,5                                                                                                       |
| TBK1_IRF3           | Identification of Ser-386 of interferon regulatory factor 3 as critical target for inducible phosphorylation that determines activation.,Mori M, Yoneyama M, Ito T, Takahashi K, Inagaki F, Fujita T., <i>J Biol Chem.</i> ,14703513,2004,3,12                                                                              |
| TBK1_IRF3           | Structural and functional analysis of interferon regulatory factor 3: localization of the transactivation and autoinhibitory domains.,Lin R, Mamane Y, Hiscott J., <i>Mol Cell Biol.</i> ,10082512,1999,4                                                                                                                   |
| TBK1_NFKB           | Post-translational modifications regulating the activity and function of the nuclear factor kappa B pathway.,Perkins ND., <i>Oncogene.</i> ,17072324,2006,10,30                                                                                                                                                             |
| TBK1_NFKB           | TOO LONG: See PubMed ID,Buss H, Dörrie A, Schmitz ML, Hoffmann E, Resch K, Kracht M., <i>J Biol Chem.</i> ,15489227,2004,12,31                                                                                                                                                                                              |

|                         |                                                                                                                                                                                                                                     |
|-------------------------|-------------------------------------------------------------------------------------------------------------------------------------------------------------------------------------------------------------------------------------|
| TBK1_NFKB_P5K           | Post-translational modifications regulating the activity and function of the nuclear factor kappa B pathway.,Perkins ND.,Oncogene.,17072324,2006,10,30                                                                              |
| TBK1_NFKB_P5K           | TOO LONG: See PubMed ID,Buss H, Dörrie A, Schmitz ML, Hoffmann E, Resch K, Kracht M.,J Biol Chem.,15489227,2004,12,31                                                                                                               |
| TBK1_PHOS               | TOO LONG: See pubmed ID,Sato S, Sugiyama M, Yamamoto M, Watanabe Y, Kawai T, Takeda K, Akira S.,J Immunol.,14530355,2003,10,15                                                                                                      |
| TICAM1P_IKKE_BIND       | TOO LONG: See pubmed ID,Sato S, Sugiyama M, Yamamoto M, Watanabe Y, Kawai T, Takeda K, Akira S.,J Immunol.,14530355,2003,10,15                                                                                                      |
| TICAM1P_IKKE_BIND       | Triggering the interferon antiviral response through an IKK-related pathway.,Sharma S, tenOever BR, Grandvaux N, Zhou GP, Lin R, Hiscott J.,Science.,12702806,2003,5,16                                                             |
| TICAM1P_TBK1_BIN D      | TOO LONG: See pubmed ID,Sato S, Sugiyama M, Yamamoto M, Watanabe Y, Kawai T, Takeda K, Akira S.,J Immunol.,14530355,2003,10,15                                                                                                      |
| TICAM2_TICAM1           | TICAM-1, an adaptor molecule that participates in Toll-like receptor 3-mediated interferon-beta induction.,Oshiumi H, Matsumoto M, Funami K, Akazawa T, Seya T.,Nat Immunol.,12539043,2003,2                                        |
| TICAM2_TICAM1           | TIR-containing adapter molecule (TICAM)-2, a bridging adapter recruiting to toll-like receptor 4 TICAM-1 that induces interferon-beta.,Oshiumi H, Sasai M, Shida K, Fujita T, Matsumoto M, Seya T.,J Biol Chem.,14519765,2003,12,12 |
| TICAM2_TLR4/L_MD2 _BIND | TIR-containing adapter molecule (TICAM)-2, a bridging adapter recruiting to toll-like receptor 4 TICAM-1 that induces interferon-beta.,Oshiumi H, Sasai M, Shida K, Fujita T, Matsumoto M, Seya T.,J Biol Chem.,14519765,2003,12,12 |
| TIR_MYD_BIND            | Cooperation of Toll-like receptor signals in innate immune defence.,Trinchieri G, Sher A.,Nat Rev Immunol.,17318230,2007,3                                                                                                          |
| TIR_MYD_BIND            | Toll-like receptor function and signaling.,Kaisho T, Akira S.,J Allergy Clin Immunol.,16675322,2006,5                                                                                                                               |
| TIR_MYD_BIND2           | Cooperation of Toll-like receptor signals in innate immune defence.,Trinchieri G, Sher A.,Nat Rev Immunol.,17318230,2007,3                                                                                                          |
| TIR_MYD_BIND2           | Toll-like receptor function and signaling.,Kaisho T, Akira S.,J Allergy Clin Immunol.,16675322,2006,5                                                                                                                               |
| TIR_MYD_BIND3           | Cooperation of Toll-like receptor signals in innate immune defence.,Trinchieri G, Sher A.,Nat Rev Immunol.,17318230,2007,3                                                                                                          |
| TIR_MYD_BIND3           | Toll-like receptor function and signaling.,Kaisho T, Akira S.,J Allergy Clin Immunol.,16675322,2006,5                                                                                                                               |
| TIR_MYD_BIND4           | Cooperation of Toll-like receptor signals in innate immune defence.,Trinchieri G, Sher A.,Nat Rev Immunol.,17318230,2007,3                                                                                                          |
| TIR_MYD_BIND4           | Toll-like receptor function and signaling.,Kaisho T, Akira S.,J Allergy Clin Immunol.,16675322,2006,5                                                                                                                               |
| TIR_MYD_BIND5           | Cooperation of Toll-like receptor signals in innate immune defence.,Trinchieri G, Sher A.,Nat Rev Immunol.,17318230,2007,3                                                                                                          |
| TIR_MYD_BIND5           | Toll-like receptor function and signaling.,Kaisho T, Akira S.,J Allergy Clin Immunol.,16675322,2006,5                                                                                                                               |
| TIR_MYD_BIND6           | Cooperation of Toll-like receptor signals in innate immune defence.,Trinchieri G, Sher A.,Nat Rev Immunol.,17318230,2007,3                                                                                                          |
| TIR_MYD_BIND6           | Toll-like receptor function and signaling.,Kaisho T, Akira S.,J Allergy Clin Immunol.,16675322,2006,5                                                                                                                               |
| TIR_MYD_BIND7           | Cooperation of Toll-like receptor signals in innate immune defence.,Trinchieri G, Sher A.,Nat Rev Immunol.,17318230,2007,3                                                                                                          |
| TIR_MYD_BIND7           | Toll-like receptor function and signaling.,Kaisho T, Akira S.,J Allergy Clin Immunol.,16675322,2006,5                                                                                                                               |
| TIR_MYD_BIND8           | Cooperation of Toll-like receptor signals in innate immune defence.,Trinchieri G, Sher A.,Nat Rev Immunol.,17318230,2007,3                                                                                                          |
| TIR_MYD_BIND8           | Toll-like receptor function and signaling.,Kaisho T, Akira S.,J Allergy Clin Immunol.,16675322,2006,5                                                                                                                               |

|                     |                                                                                                                                                                                                                                                                  |
|---------------------|------------------------------------------------------------------------------------------------------------------------------------------------------------------------------------------------------------------------------------------------------------------|
| TIR_MYD_BIND9       | Cooperation of Toll-like receptor signals in innate immune defence.,Trinchieri G, Sher A.,Nat Rev Immunol.,17318230,2007,3                                                                                                                                       |
| TIR_MYD_BIND9       | Toll-like receptor function and signaling.,Kaisho T, Akira S.,J Allergy Clin Immunol.,16675322,2006,5                                                                                                                                                            |
| TIR_MYD_FADD_BIND   | Membrane oligomerization and cleavage activates the caspase-8 (FLICE/MACHalpha1) death signal.,Martin DA, Siegel RM, Zheng L, Lenardo MJ.,J Biol Chem.,9468483,1998,2,20                                                                                         |
| TIR_MYD_FADD_BIND   | The apoptotic signaling pathway activated by Toll-like receptor-2.,Aliprantis AO, Yang RB, Weiss DS, Godowski P, Zychlinsky A.,EMBO J.,10880445,2000,7,3                                                                                                         |
| TIR_MYD_IRAK4_BIND  | Inhibition of interleukin 1 receptor/Toll-like receptor signaling through the alternatively spliced, short form of MyD88 is due to its failure to recruit IRAK-4.,Burns K, Janssens S, Brissoni B, Olivos N, Beyaert R, Tschopp J.,J Exp Med.,12538665,2003,1,20 |
| TIR_MYD_IRAK4_BIND  | MyD88: an adapter that recruits IRAK to the IL-1 receptor complex.,Wesche H, Henzel WJ, Shillinglaw W, Li S, Cao Z.,Immunity,9430229,1997,12                                                                                                                     |
| TIR_MYD_TOLLIP_BIND | A novel splice variant of interleukin-1 receptor (IL-1R)-associated kinase 1 plays a negative regulatory role in Toll/IL-1R-induced inflammatory signaling.,Rao N, Nguyen S, Ngo K, Fung-Leung WP.,Mol Cell Biol.,16024789,2005,8                                |
| TIR_TIRAP_BIND      | Cooperation of Toll-like receptor signals in innate immune defence.,Trinchieri G, Sher A.,Nat Rev Immunol.,17318230,2007,3                                                                                                                                       |
| TIR_TIRAP_BIND      | Essential role for TIRAP in activation of the signalling cascade shared by TLR2 and TLR4.,Yamamoto M, Sato S, Hemmi H, Sanjo H, Uematsu S, Kaisho T, Hoshino K, Takeuchi O, Kobayashi M, Fujita T, Takeda K, Akira S.,Nature,12447441,2002,11,21                 |
| TIR_TIRAP_BIND      | Toll-like receptor function and signaling.,Kaisho T, Akira S.,J Allergy Clin Immunol.,16675322,2006,5                                                                                                                                                            |
| TIR_TIRAP_BIND2     | Cooperation of Toll-like receptor signals in innate immune defence.,Trinchieri G, Sher A.,Nat Rev Immunol.,17318230,2007,3                                                                                                                                       |
| TIR_TIRAP_BIND2     | Essential role for TIRAP in activation of the signalling cascade shared by TLR2 and TLR4.,Yamamoto M, Sato S, Hemmi H, Sanjo H, Uematsu S, Kaisho T, Hoshino K, Takeuchi O, Kobayashi M, Fujita T, Takeda K, Akira S.,Nature,12447441,2002,11,21                 |
| TIR_TIRAP_BIND2     | Toll-like receptor function and signaling.,Kaisho T, Akira S.,J Allergy Clin Immunol.,16675322,2006,5                                                                                                                                                            |
| TIR_TIRAP_BIND3     | Cooperation of Toll-like receptor signals in innate immune defence.,Trinchieri G, Sher A.,Nat Rev Immunol.,17318230,2007,3                                                                                                                                       |
| TIR_TIRAP_BIND3     | Essential role for TIRAP in activation of the signalling cascade shared by TLR2 and TLR4.,Yamamoto M, Sato S, Hemmi H, Sanjo H, Uematsu S, Kaisho T, Hoshino K, Takeuchi O, Kobayashi M, Fujita T, Takeda K, Akira S.,Nature,12447441,2002,11,21                 |
| TIR_TIRAP_BIND3     | Toll-like receptor function and signaling.,Kaisho T, Akira S.,J Allergy Clin Immunol.,16675322,2006,5                                                                                                                                                            |
| TIR_TIRAP_BIND4     | Cooperation of Toll-like receptor signals in innate immune defence.,Trinchieri G, Sher A.,Nat Rev Immunol.,17318230,2007,3                                                                                                                                       |
| TIR_TIRAP_BIND4     | Essential role for TIRAP in activation of the signalling cascade shared by TLR2 and TLR4.,Yamamoto M, Sato S, Hemmi H, Sanjo H, Uematsu S, Kaisho T, Hoshino K, Takeuchi O, Kobayashi M, Fujita T, Takeda K, Akira S.,Nature,12447441,2002,11,21                 |
| TIR_TIRAP_BIND4     | Toll-like receptor function and signaling.,Kaisho T, Akira S.,J Allergy Clin Immunol.,16675322,2006,5                                                                                                                                                            |

|                         |                                                                                                                                                                                                                                                                                                              |
|-------------------------|--------------------------------------------------------------------------------------------------------------------------------------------------------------------------------------------------------------------------------------------------------------------------------------------------------------|
| TIR_TIRAP_IRAK2_BIND    | Mal (MyD88-adaptor-like) is required for Toll-like receptor-4 signal transduction.,Fitzgerald KA, Palsson-McDermott EM, Bowie AG, Jefferies CA, Mansell AS, Brady G, Brint E, Dunne A, Gray P, Harte MT, McMurray D, Smith DE, Sims JE, Bird TA, O'Neill LA.,Nature,11544529,2001,9,6                        |
| TIR_TIRAP_IRAK2_BIND    | Toll-like receptor signaling.,Akira S.,J Biol Chem.,12893815,2003,10,3                                                                                                                                                                                                                                       |
| TIR_TIRAP_IRAK4_BIND    | IRAK-4: a novel member of the IRAK family with the properties of an IRAK-kinase.,Li S, Strelow A, Fontana EJ, Wesche H.,Proc Natl Acad Sci USA,11960013,2002,4,16                                                                                                                                            |
| TIR_TIRAP_IRAK4_BIND    | Toll-like receptor signaling.,Akira S.,J Biol Chem.,12893815,2003,10,3                                                                                                                                                                                                                                       |
| TIR_TIRAP_MYD_BIND      | Essential role for TIRAP in activation of the signalling cascade shared by TLR2 and TLR4.,Yamamoto M, Sato S, Hemmi H, Sanjo H, Uematsu S, Kaisho T, Hoshino K, Takeuchi O, Kobayashi M, Fujita T, Takeda K, Akira S.,Nature,12447441,2002,11,21                                                             |
| TIR_TIRAP_MYD_BIND      | The adaptor molecule TIRAP provides signalling specificity for Toll-like receptors.,Horng T, Barton GM, Flavell RA, Medzhitov R.,Nature,12447442,2002,11,21                                                                                                                                                  |
| TIR_TIRAP_MYD_FADD_BIND | Membrane oligomerization and cleavage activates the caspase-8 (FLICE/MACHalpha1) death signal.,Martin DA, Siegel RM, Zheng L, Lenardo MJ.,J Biol Chem.,9468483,1998,2,20                                                                                                                                     |
| TIR_TIRAP_MYD_FADD_BIND | The apoptotic signaling pathway activated by Toll-like receptor-2.,Aliprantis AO, Yang RB, Weiss DS, Godowski P, Zychlinsky A.,EMBO J.,10880445,2000,7,3                                                                                                                                                     |
| TIR_TIRAP_TOLLIP_2PHOS  | Negative regulation of toll-like receptor-mediated signaling by Tollip.,Zhang G, Ghosh S.,J Biol Chem.,11751856,2002,3,1                                                                                                                                                                                     |
| TIR_TIRAP_TOLLIP_2PHOS  | Sequential autophosphorylation steps in the interleukin-1 receptor-associated kinase-1 regulate its availability as an adapter in interleukin-1 signaling.,Kollewe C, Mackensen AC, Neumann D, Knop J, Cao P, Li S, Wesche H, Martin MU.,J Biol Chem.,14625308,2004,2,13                                     |
| TIR_TIRAP_TOLLIP_BIND   | Negative regulation of toll-like receptor-mediated signaling by Tollip.,Zhang G, Ghosh S.,J Biol Chem.,11751856,2002,3,1                                                                                                                                                                                     |
| TIR_TIRAP_TOLLIP_BIND   | Toll-like receptor signaling.,Akira S.,J Biol Chem.,12893815,2003,10,3                                                                                                                                                                                                                                       |
| TIR_TIRAP_TOLLIP_2PHOS  | IRAK-4: a novel member of the IRAK family with the properties of an IRAK-kinase.,Li S, Strelow A, Fontana EJ, Wesche H.,Proc Natl Acad Sci USA,11960013,2002,4,16                                                                                                                                            |
| TIR_TIRAP_TOLLIP_2PHOS  | Negative regulation of toll-like receptor-mediated immune responses.,Liew FY, Xu D, Brint EK, O'Neill LA.,Nat Rev Immunol.,15928677,2005,6                                                                                                                                                                   |
| TIR_TIRAP_TOLLIP_2PHOS  | Negative regulation of toll-like receptor-mediated signaling by Tollip.,Zhang G, Ghosh S.,J Biol Chem.,11751856,2002,3,1                                                                                                                                                                                     |
| TIR_TIRAP_TOLLIP_2PHOS  | Sequential autophosphorylation steps in the interleukin-1 receptor-associated kinase-1 regulate its availability as an adapter in interleukin-1 signaling.,Kollewe C, Mackensen AC, Neumann D, Knop J, Cao P, Li S, Wesche H, Martin MU.,J Biol Chem.,14625308,2004,2,13                                     |
| TLR1/10_BIND            | Human TLR10 is a functional receptor, expressed by B cells and plasmacytoid dendritic cells, which activates gene transcription through MyD88.,Hasan U, Chaffois C, Gaillard C, Saulnier V, Merck E, Tancredi S, Guet C, Briere F, Vlach J, Lebecque S, Trinchieri G, Bates EE.,J Immunol.,15728506,2005,3,1 |
| TLR1/10_BIND            | Inferences, questions and possibilities in Toll-like receptor signalling.,Beautler B.,Nature.,15241424,2004,7,8                                                                                                                                                                                              |
| TLR1/10_BIND            | TLR signaling.,Kawai T, Akira S.,Cell Death Differ.,16410796,2006,5                                                                                                                                                                                                                                          |
| TLR1/10_BIND            | Toll-like receptor function and signaling.,Kaisho T, Akira S.,J Allergy Clin Immunol.,16675322,2006,5                                                                                                                                                                                                        |
| TLR1/10_BIND            | Toll-like receptor signaling.,Akira S.,J Biol Chem.,12893815,2003,10,3                                                                                                                                                                                                                                       |

|               |                                                                                                                                                                                                                                                                                                              |
|---------------|--------------------------------------------------------------------------------------------------------------------------------------------------------------------------------------------------------------------------------------------------------------------------------------------------------------|
| TLR1/10_BIND  | Toll-like receptors and innate immunity.,Uematsu S, Akira S.,J Mol Med.,16924467,2006,9                                                                                                                                                                                                                      |
| TLR1/2_BIND   | Inferences, questions and possibilities in Toll-like receptor signalling.,Beautler B.,Nature.,15241424,2004,7,8                                                                                                                                                                                              |
| TLR1/2_BIND   | TLR signaling.,Kawai T, Akira S.,Cell Death Differ.,16410796,2006,5                                                                                                                                                                                                                                          |
| TLR1/2_BIND   | Toll-like receptor function and signaling.,Kaisho T, Akira S.,J Allergy Clin Immunol.,16675322,2006,5                                                                                                                                                                                                        |
| TLR1/2_BIND   | Toll-like receptor signaling.,Akira S.,J Biol Chem.,12893815,2003,10,3                                                                                                                                                                                                                                       |
| TLR1/2_BIND   | Toll-like receptors and innate immunity.,Uematsu S, Akira S.,J Mol Med.,16924467,2006,9                                                                                                                                                                                                                      |
| TLR10_BIND    | Human TLR10 is a functional receptor, expressed by B cells and plasmacytoid dendritic cells, which activates gene transcription through MyD88.,Hasan U, Chaffois C, Gaillard C, Saulnier V, Merck E, Tancredi S, Guet C, Brière F, Vlach J, Lebecque S, Trinchieri G, Bates EE.,J Immunol.,15728506,2005,3,1 |
| TLR10_BIND    | Inferences, questions and possibilities in Toll-like receptor signalling.,Beautler B.,Nature.,15241424,2004,7,8                                                                                                                                                                                              |
| TLR10_BIND    | TLR signaling.,Kawai T, Akira S.,Cell Death Differ.,16410796,2006,5                                                                                                                                                                                                                                          |
| TLR10_BIND    | Toll-like receptor function and signaling.,Kaisho T, Akira S.,J Allergy Clin Immunol.,16675322,2006,5                                                                                                                                                                                                        |
| TLR10_BIND    | Toll-like receptor signaling.,Akira S.,J Biol Chem.,12893815,2003,10,3                                                                                                                                                                                                                                       |
| TLR10_BIND    | Toll-like receptors and innate immunity.,Uematsu S, Akira S.,J Mol Med.,16924467,2006,9                                                                                                                                                                                                                      |
| TLR2/10_BIND  | Human TLR10 is a functional receptor, expressed by B cells and plasmacytoid dendritic cells, which activates gene transcription through MyD88.,Hasan U, Chaffois C, Gaillard C, Saulnier V, Merck E, Tancredi S, Guet C, Brière F, Vlach J, Lebecque S, Trinchieri G, Bates EE.,J Immunol.,15728506,2005,3,1 |
| TLR2/10_BIND  | Inferences, questions and possibilities in Toll-like receptor signalling.,Beautler B.,Nature.,15241424,2004,7,8                                                                                                                                                                                              |
| TLR2/10_BIND  | TLR signaling.,Kawai T, Akira S.,Cell Death Differ.,16410796,2006,5                                                                                                                                                                                                                                          |
| TLR2/10_BIND  | Toll-like receptor function and signaling.,Kaisho T, Akira S.,J Allergy Clin Immunol.,16675322,2006,5                                                                                                                                                                                                        |
| TLR2/10_BIND  | Toll-like receptor signaling.,Akira S.,J Biol Chem.,12893815,2003,10,3                                                                                                                                                                                                                                       |
| TLR2/10_BIND  | Toll-like receptors and innate immunity.,Uematsu S, Akira S.,J Mol Med.,16924467,2006,9                                                                                                                                                                                                                      |
| TLR2/6_BIND   | Inferences, questions and possibilities in Toll-like receptor signalling.,Beautler B.,Nature.,15241424,2004,7,8                                                                                                                                                                                              |
| TLR2/6_BIND   | TLR signaling.,Kawai T, Akira S.,Cell Death Differ.,16410796,2006,5                                                                                                                                                                                                                                          |
| TLR2/6_BIND   | Toll-like receptor function and signaling.,Kaisho T, Akira S.,J Allergy Clin Immunol.,16675322,2006,5                                                                                                                                                                                                        |
| TLR2/6_BIND   | Toll-like receptor signaling.,Akira S.,J Biol Chem.,12893815,2003,10,3                                                                                                                                                                                                                                       |
| TLR2/6_BIND   | Toll-like receptors and innate immunity.,Uematsu S, Akira S.,J Mol Med.,16924467,2006,9                                                                                                                                                                                                                      |
| TLR2/L-D_BIND | Essential roles of CD14 and lipopolysaccharide-binding protein for activation of toll-like receptor (TLR)2 as well as TLR4 Reconstitution of TLR2- and TLR4-activation by distinguishable ligands in LPS preparations.,Muta T, Takeshige K.,Eur J Biochem.,11502220,2001,8                                   |
| TLR2/L-D_BIND | Inferences, questions and possibilities in Toll-like receptor signalling.,Beautler B.,Nature.,15241424,2004,7,8                                                                                                                                                                                              |
| TLR2_2PHOS    | Toll-like receptor 2-mediated NF-kappa B activation requires a Rac1-dependent pathway.,Arbibe L, Mira JP, Teusch N, Kline L, Guha M, Mackman N, Godowski PJ, Ulevitch RJ, Knaus UG.,Nat Immunol.,11101877,2000,12                                                                                            |
| TLR2_PI3K1A   | Toll-like receptor 2-mediated NF-kappa B activation requires a Rac1-dependent pathway.,Arbibe L, Mira JP, Teusch N, Kline L, Guha M, Mackman N, Godowski PJ, Ulevitch RJ, Knaus UG.,Nat Immunol.,11101877,2000,12                                                                                            |

|                        |                                                                                                                                                                                                                                                                            |
|------------------------|----------------------------------------------------------------------------------------------------------------------------------------------------------------------------------------------------------------------------------------------------------------------------|
| TLR3_2PHOS             | Inferences, questions and possibilities in Toll-like receptor signalling.,Beautler B.,Nature.,15241424,2004,7,8                                                                                                                                                            |
| TLR3_2PHOS             | TLR signaling.,Kawai T, Akira S.,Cell Death Differ.,16410796,2006,5                                                                                                                                                                                                        |
| TLR3_2PHOS             | Toll-like receptor function and signaling.,Kaisho T, Akira S.,J Allergy Clin Immunol.,16675322,2006,5                                                                                                                                                                      |
| TLR3_2PHOS             | Toll-like receptor signaling.,Akira S.,J Biol Chem.,12893815,2003,10,3                                                                                                                                                                                                     |
| TLR3_2PHOS             | Toll-like receptors and innate immunity.,Uematsu S, Akira S.,J Mol Med.,16924467,2006,9                                                                                                                                                                                    |
| TLR3_BIND              | Inferences, questions and possibilities in Toll-like receptor signalling.,Beautler B.,Nature.,15241424,2004,7,8                                                                                                                                                            |
| TLR3_BIND              | TLR signaling.,Kawai T, Akira S.,Cell Death Differ.,16410796,2006,5                                                                                                                                                                                                        |
| TLR3_BIND              | Toll-like receptor function and signaling.,Kaisho T, Akira S.,J Allergy Clin Immunol.,16675322,2006,5                                                                                                                                                                      |
| TLR3_BIND              | Toll-like receptor signaling.,Akira S.,J Biol Chem.,12893815,2003,10,3                                                                                                                                                                                                     |
| TLR3_BIND              | Toll-like receptors and innate immunity.,Uematsu S, Akira S.,J Mol Med.,16924467,2006,9                                                                                                                                                                                    |
| TLR3_PI3K1A            | Novel roles of TLR3 tyrosine phosphorylation and PI3 kinase in double-stranded RNA signaling.,Sarkar SN, Peters KL, Elco CP, Sakamoto S, Pal S, Sen GC.,Nat Struct Mol Biol.,15502848,2004,11                                                                              |
| TLR3_TICAM1            | Cooperation of Toll-like receptor signals in innate immune defence.,Trinchieri G, Sher A.,Nat Rev Immunol.,17318230,2007,3                                                                                                                                                 |
| TLR3_TICAM1            | TICAM-1, an adaptor molecule that participates in Toll-like receptor 3-mediated interferon-beta induction.,Oshiumi H, Matsumoto M, Funami K, Akazawa T, Seya T.,Nat Immunol.,12539043,2003,2                                                                               |
| TLR3_TICAM1            | Toll-like receptor function and signaling.,Kaisho T, Akira S.,J Allergy Clin Immunol.,16675322,2006,5                                                                                                                                                                      |
| TLR4/L_MD2_BIND        | Essential roles of CD14 and lipopolysaccharide-binding protein for activation of toll-like receptor (TLR)2 as well as TLR4 Reconstitution of TLR2- and TLR4-activation by distinguishable ligands in LPS preparations.,Muta T, Takeshige K.,Eur J Biochem.,11502220,2001,8 |
| TLR4/L_MD2_BIND        | Inferences, questions and possibilities in Toll-like receptor signalling.,Beautler B.,Nature.,15241424,2004,7,8                                                                                                                                                            |
| TLR4/L_MD2_BIND        | Lysines 128 and 132 enable lipopolysaccharide binding to MD-2, leading to Toll-like receptor-4 aggregation and signal transduction.,Visintin A, Latz E, Monks BG, Espevik T, Golenbock DT.,J Biol Chem.,12960171,2003,11,28                                                |
| TLR4/L_MD2_TRD3A_BIND  | Triad3A, an E3 ubiquitin-protein ligase regulating Toll-like receptors.,Chuang TH, Ulevitch RJ.,Nat Immunol.,15107846,2004,5                                                                                                                                               |
| TLR4/L_MD2_TRD3A_DEGR  | Triad3A, an E3 ubiquitin-protein ligase regulating Toll-like receptors.,Chuang TH, Ulevitch RJ.,Nat Immunol.,15107846,2004,5                                                                                                                                               |
| TLR4_MD2_BIND          | Endotoxin recognition and signal transduction by the TLR4/MD2-complex.,Fitzgerald KA, Rowe DC, Golenbock DT.,Microbes Infect.,15596121,2004,12                                                                                                                             |
| TLR4_MD2_BIND          | Monomeric recombinant MD-2 binds toll-like receptor 4 tightly and confers lipopolysaccharide responsiveness.,Re F, Strominger JL.,J Biol Chem.,11976338,2002,6,28                                                                                                          |
| TLR4_SIGIRR_BIND       | SIGIRR, a negative regulator of Toll-like receptor-interleukin 1 receptor signaling.,Wald D, Qin J, Zhao Z, Qian Y, Naramura M, Tian L, Towne J, Sims JE, Stark GR, Li X.,Nat Immunol.,12925853,2003,9                                                                     |
| TLR4_SIGIRR_TRAF6_BIND | SIGIRR, a negative regulator of Toll-like receptor-interleukin 1 receptor signaling.,Wald D, Qin J, Zhao Z, Qian Y, Naramura M, Tian L, Towne J, Sims JE, Stark GR, Li X.,Nat Immunol.,12925853,2003,9                                                                     |
| TLR5_BIND              | TLR signaling.,Kawai T, Akira S.,Cell Death Differ.,16410796,2006,5                                                                                                                                                                                                        |
| TLR5_BIND              | TOO LONG: See pubmed ID,Sato S, Sugiyama M, Yamamoto M, Watanabe Y, Kawai T, Takeda K, Akira S.,J Immunol.,14530355,2003,10,15                                                                                                                                             |

|                        |                                                                                                                                                                                                                            |
|------------------------|----------------------------------------------------------------------------------------------------------------------------------------------------------------------------------------------------------------------------|
| TLR5_BIND              | Toll-like receptor function and signaling.,Kaisho T, Akira S.,J Allergy Clin Immunol.,16675322,2006,5                                                                                                                      |
| TLR5_BIND              | Toll-like receptor signaling.,Akira S.,J Biol Chem.,12893815,2003,10,3                                                                                                                                                     |
| TLR5_BIND              | Toll-like receptors and innate immunity.,Uematsu S, Akira S.,J Mol Med.,16924467,2006,9                                                                                                                                    |
| TLR5_SIGIRR_BIND       | SIGIRR, a negative regulator of Toll-like receptor-interleukin 1 receptor signaling.,Wald D, Qin J, Zhao Z, Qian Y, Naramura M, Tian L, Towne J, Sims JE, Stark GR, Li X.,Nat Immunol.,12925853,2003,9                     |
| TLR5_SIGIRR_TRAF6_BIND | SIGIRR, a negative regulator of Toll-like receptor-interleukin 1 receptor signaling.,Wald D, Qin J, Zhao Z, Qian Y, Naramura M, Tian L, Towne J, Sims JE, Stark GR, Li X.,Nat Immunol.,12925853,2003,9                     |
| TLR7_BIND              | Inferences, questions and possibilities in Toll-like receptor signalling.,Beautler B.,Nature.,15241424,2004,7,8                                                                                                            |
| TLR7_BIND              | TLR signaling.,Kawai T, Akira S.,Cell Death Differ.,16410796,2006,5                                                                                                                                                        |
| TLR7_BIND              | Toll-like receptor function and signaling.,Kaisho T, Akira S.,J Allergy Clin Immunol.,16675322,2006,5                                                                                                                      |
| TLR7_BIND              | Toll-like receptor signaling.,Akira S.,J Biol Chem.,12893815,2003,10,3                                                                                                                                                     |
| TLR7_BIND              | Toll-like receptors and innate immunity.,Uematsu S, Akira S.,J Mol Med.,16924467,2006,9                                                                                                                                    |
| TLR8_BIND              | Inferences, questions and possibilities in Toll-like receptor signalling.,Beautler B.,Nature.,15241424,2004,7,8                                                                                                            |
| TLR8_BIND              | TLR signaling.,Kawai T, Akira S.,Cell Death Differ.,16410796,2006,5                                                                                                                                                        |
| TLR8_BIND              | Toll-like receptor function and signaling.,Kaisho T, Akira S.,J Allergy Clin Immunol.,16675322,2006,5                                                                                                                      |
| TLR8_BIND              | Toll-like receptor signaling.,Akira S.,J Biol Chem.,12893815,2003,10,3                                                                                                                                                     |
| TLR8_BIND              | Toll-like receptors and innate immunity.,Uematsu S, Akira S.,J Mol Med.,16924467,2006,9                                                                                                                                    |
| TLR9/L_TRD3A_BIND      | Triad3A, an E3 ubiquitin-protein ligase regulating Toll-like receptors.,Chuang TH, Ulevitch RJ.,Nat Immunol.,15107846,2004,5                                                                                               |
| TLR9/L_TRD3A_DEGR      | Triad3A, an E3 ubiquitin-protein ligase regulating Toll-like receptors.,Chuang TH, Ulevitch RJ.,Nat Immunol.,15107846,2004,5                                                                                               |
| TLR9_BIND              | Inferences, questions and possibilities in Toll-like receptor signalling.,Beautler B.,Nature.,15241424,2004,7,8                                                                                                            |
| TLR9_BIND              | Mechanisms of TLR9 activation.,Latz E, Visintin A, Espevik T, Golenbock DT.,J Endotoxin Res.,15588423,2004                                                                                                                 |
| TLR9_BIND              | TLR signaling.,Kawai T, Akira S.,Cell Death Differ.,16410796,2006,5                                                                                                                                                        |
| TLR9_BIND              | TLR9 signals after translocating from the ER to CpG DNA in the lysosome.,Latz E, Schoenemeyer A, Visintin A, Fitzgerald KA, Monks BG, Knetter CF, Lien E, Nilsen NJ, Espevik T, Golenbock DT.,Nat Immunol.,14716310,2004,2 |
| TLR9_BIND              | Toll-like receptor function and signaling.,Kaisho T, Akira S.,J Allergy Clin Immunol.,16675322,2006,5                                                                                                                      |
| TLR9_BIND              | Toll-like receptor signaling.,Akira S.,J Biol Chem.,12893815,2003,10,3                                                                                                                                                     |
| TLR9_BIND              | Toll-like receptors and innate immunity.,Uematsu S, Akira S.,J Mol Med.,16924467,2006,9                                                                                                                                    |
| TLR9_SIGIRR_BIND       | SIGIRR, a negative regulator of Toll-like receptor-interleukin 1 receptor signaling.,Wald D, Qin J, Zhao Z, Qian Y, Naramura M, Tian L, Towne J, Sims JE, Stark GR, Li X.,Nat Immunol.,12925853,2003,9                     |
| TLR9_SIGIRR_TRAF6_BIND | SIGIRR, a negative regulator of Toll-like receptor-interleukin 1 receptor signaling.,Wald D, Qin J, Zhao Z, Qian Y, Naramura M, Tian L, Towne J, Sims JE, Stark GR, Li X.,Nat Immunol.,12925853,2003,9                     |
| TLR9_TRAN              | TLR9 signals after translocating from the ER to CpG DNA in the lysosome.,Latz E, Schoenemeyer A, Visintin A, Fitzgerald KA, Monks BG, Knetter CF, Lien E, Nilsen NJ, Espevik T, Golenbock DT.,Nat Immunol.,14716310,2004,2 |

|                         |                                                                                                                                                                                                                                                                      |
|-------------------------|----------------------------------------------------------------------------------------------------------------------------------------------------------------------------------------------------------------------------------------------------------------------|
| TOLLIP_DEGR             | Negative regulation of toll-like receptor-mediated signaling by Tollip.,Zhang G, Ghosh S.,J Biol Chem.,11751856,2002,3,1                                                                                                                                             |
| TOLLIP_DEGR2            | Negative regulation of toll-like receptor-mediated signaling by Tollip.,Zhang G, Ghosh S.,J Biol Chem.,11751856,2002,3,1                                                                                                                                             |
| TOLLIP_PHOS             | Negative regulation of toll-like receptor-mediated signaling by Tollip.,Zhang G, Ghosh S.,J Biol Chem.,11751856,2002,3,1                                                                                                                                             |
| TOLLIP_UBIQ             | Negative regulation of toll-like receptor-mediated signaling by Tollip.,Zhang G, Ghosh S.,J Biol Chem.,11751856,2002,3,1                                                                                                                                             |
| TOLLIP_pail345p_hs_BIND | Characterization of Tollip protein upon Lipopolysaccharide challenge.,Li T, Hu J, Li L.,Mol Immunol.,15140579,2004,5                                                                                                                                                 |
| TOLLIP_pail3p_hs_BI ND  | Characterization of Tollip protein upon Lipopolysaccharide challenge.,Li T, Hu J, Li L.,Mol Immunol.,15140579,2004,5                                                                                                                                                 |
| TRAF6_DIME              | Cutting edge: TNFR-associated factor (TRAF) 6 is essential for MyD88-dependent pathway but not toll/IL-1 receptor domain-containing adaptor-inducing IFN-beta (TRIF)-dependent pathway in TLR signaling.,Gohda J, Matsumura T, Inoue J.,J Immunol.,15322147,2004,9,1 |
| TRAF6_DIME              | Toll-like receptor signaling.,Akira S.,J Biol Chem.,12893815,2003,10,3                                                                                                                                                                                               |
| TRAF6_SIGIRR_BIND       | SIGIRR, a negative regulator of Toll-like receptor-interleukin 1 receptor signaling.,Wald D, Qin J, Zhao Z, Qian Y, Naramura M, Tian L, Towne J, Sims JE, Stark GR, Li X.,Nat Immunol.,12925853,2003,9                                                               |
| TRX_NADPH_BIND          | Reactive oxygen species, antioxidants, and the mammalian thioredoxin system.,Nordberg J, Arnér ES.,Free Radic Biol Med.,11728801,2001,12,1                                                                                                                           |
| TRX_NADPH_BIND          | Thioredoxin: a multifunctional antioxidant enzyme in kidney, heart and vessels.,Yamawaki H, Berk BC.,Curr Opin Nephrol Hypertens.,15687841,2005,3                                                                                                                    |
| TRX_OXID                | Reactive oxygen species, antioxidants, and the mammalian thioredoxin system.,Nordberg J, Arnér ES.,Free Radic Biol Med.,11728801,2001,12,1                                                                                                                           |
| TRX_REDU                | Reactive oxygen species, antioxidants, and the mammalian thioredoxin system.,Nordberg J, Arnér ES.,Free Radic Biol Med.,11728801,2001,12,1                                                                                                                           |
| TRX_REDU                | Thioredoxin: a multifunctional antioxidant enzyme in kidney, heart and vessels.,Yamawaki H, Berk BC.,Curr Opin Nephrol Hypertens.,15687841,2005,3                                                                                                                    |
| ca2_TRAN                | Inositol 1,4,5-trisphosphate receptors as signal integrators.,Patterson RL, Boehning D, Snyder SH.,Annu Rev Biochem.,15189149,2004                                                                                                                                   |
| ca2_TRAN2               | Identification of Ser38 as the site in cardiac sarcoplasmic reticulum Ca(2+)-ATPase that is phosphorylated by Ca2+/calmodulin-dependent protein kinase.,Toyofuku T, Curotto Kurzydowski K, Narayanan N, MacLennan DH.,J Biol Chem.,7929371,1994,10,21                |
| pa_hs_DEPH              | Phosphatidate phosphatases of mammals, yeast, and higher plants.,Kocsis MG, Weselake RJ.,Lipids.,8869881,1996,8                                                                                                                                                      |
| pail45p_hs DISS         | Regulation of phosphoinositide-specific phospholipase C isozymes.,Rhee SG, Bae YS.,J Biol Chem.,9182519,1997,6,13                                                                                                                                                    |
| pail45p_hs DISS         | Synthesis and function of 3-phosphorylated inositol lipids.,Vanhaesebroeck B, Leever SJ, Ahmadi K, Timms J, Katso R, Driscoll PC, Woscholski R, Parker PJ, Waterfield MD.,Annu Rev Biochem.,11395417,2001                                                            |
| pail45p_hs DISS2        | Regulation of phosphoinositide-specific phospholipase C isozymes.,Rhee SG, Bae YS.,J Biol Chem.,9182519,1997,6,13                                                                                                                                                    |
| pail45p_hs DISS2        | Synthesis and function of 3-phosphorylated inositol lipids.,Vanhaesebroeck B, Leever SJ, Ahmadi K, Timms J, Katso R, Driscoll PC, Woscholski R, Parker PJ, Waterfield MD.,Annu Rev Biochem.,11395417,2001                                                            |
| pail45p_hs_PLCB2_BI ND  | Regulation of phosphoinositide-specific phospholipase C isozymes.,Rhee SG, Bae YS.,J Biol Chem.,9182519,1997,6,13                                                                                                                                                    |
| pail45p_hs_PLCB2_BI ND  | Synthesis and function of 3-phosphorylated inositol lipids.,Vanhaesebroeck B, Leever SJ, Ahmadi K, Timms J, Katso R, Driscoll PC, Woscholski R, Parker PJ, Waterfield MD.,Annu Rev Biochem.,11395417,2001                                                            |



|                          |                                                                                                                                                                                                           |
|--------------------------|-----------------------------------------------------------------------------------------------------------------------------------------------------------------------------------------------------------|
| pail45p_hs_PLCG_BIN<br>D | Regulation of phosphoinositide-specific phospholipase C isozymes.,Rhee SG, Bae YS.,J Biol Chem.,9182519,1997,6,13                                                                                         |
| pail45p_hs_PLCG_BIN<br>D | Synthesis and function of 3-phosphorylated inositol lipids.,Vanhaesebroeck B, Leever SJ, Ahmadi K, Timms J, Katso R, Driscoll PC, Woscholski R, Parker PJ, Waterfield MD.,Annu Rev Biochem.,11395417,2001 |
| pail_hs_PHOS             | Phosphoinositide 3-kinases and the regulation of vesicular trafficking.,Backer JM.,Mol Cell Biol Res Commun.,10891392,2000,4                                                                              |
| pchol_hs_DISS            | Phospholipase D-mediated hydrolysis of phosphatidylcholine: role in cell signalling.,Liscovitch M, Ben-Av P, Danin M, Faiman G, Eldar H, Livneh E.,J Lipid Mediat.,8268464,1993,11                        |
| pchol_hs_PLDP_BIND       | Phospholipase D-mediated hydrolysis of phosphatidylcholine: role in cell signalling.,Liscovitch M, Ben-Av P, Danin M, Faiman G, Eldar H, Livneh E.,J Lipid Mediat.,8268464,1993,11                        |

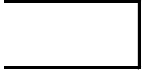

Supplement: pcbi.1000292.s009.pdf [file pcbi.1000292.s009.pdf]
