# Supplementary material for: Identification of Potential Pathway Mediation Targets in Toll-like Receptor Signaling
Source: PubMed Central journal article supplement (PMC2634968; doi:10.1371/journal.pcbi.1000292), 2009-02-20

Figure S1: Map of the reconstructed TLR signaling network

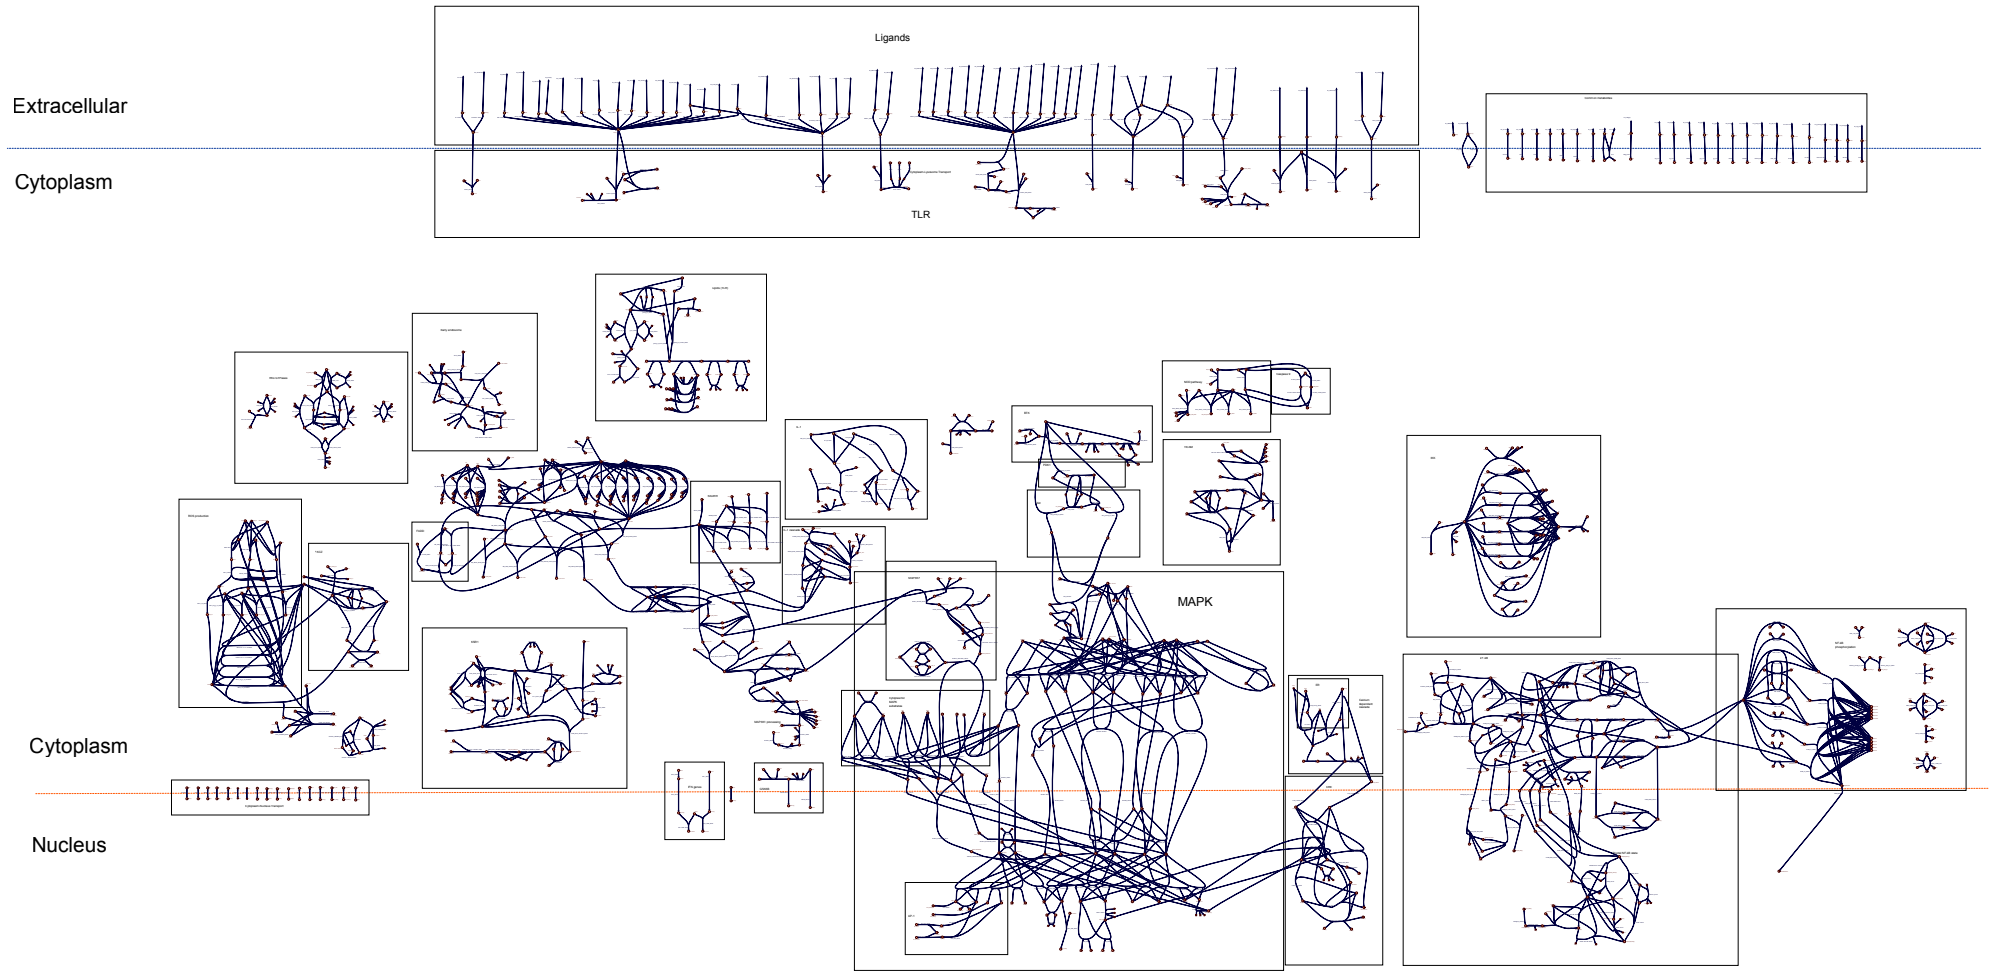

Supplement: pcbi.1000292.s002.pdf [file pcbi.1000292.s002.pdf]
