# Supplementary material for: Identification of Potential Pathway Mediation Targets in Toll-like Receptor Signaling
Source: PubMed Central journal article supplement (PMC2634968; doi:10.1371/journal.pcbi.1000292), 2009-02-20
Supplement: pcbi.1000292.s003.pdf [file pcbi.1000292.s003.pdf]

**Table S1: TLR network species**

\* refers to Figure 2 in paper.

| SPECIES NUMBER* | PARTICIPATION * | ABBREVIATION           | NAME                                                                                                                                      | COMPARTMENT    |
|-----------------|-----------------|------------------------|-------------------------------------------------------------------------------------------------------------------------------------------|----------------|
| 1               | 68              | h(c)                   | H+                                                                                                                                        | Cytosol        |
| 2               | 57              | adp(c)                 | ADP                                                                                                                                       | Cytosol        |
| 3               | 57              | atp(c)                 | ATP                                                                                                                                       | Cytosol        |
| 4               | 25              | IKK(c)                 | inhibitor of kappa light polypeptide gene enhancer in B-cells kinase alpha(dimer)/beta(dimer)/gamma (tetramer) complex                    | Cytosol        |
| 5               | 23              | UBIQ(c)                | Ubiquitin                                                                                                                                 | Cytosol        |
| 6               | 22              | h2o(c)                 | H2O                                                                                                                                       | Cytosol        |
| 7               | 21              | IKK-2P(c)              | inhibitor of kappa light polypeptide gene enhancer in B-cells kinase alpha(dimer)/beta(dimer)/gamma (tetramer) complex (4 phosphorylated) | Cytosol        |
| 8               | 18              | TLRL2(e)               | Toll-like receptor 2 ligand (generic)                                                                                                     | Extra-organism |
| 9               | 17              | MYD88-D(c)             | Myeloid differentiation primary response 88 (dimer)                                                                                       | Cytosol        |
| 10              | 17              | pi(c)                  | Phosphate                                                                                                                                 | Cytosol        |
| 11              | 16              | IRAK1_TIFA-2P3U(c)     | IRAK1/TIFA/TRAF6 (dimer)/Ubc13/Uev1A complex (2 phosphorylated)                                                                           | Cytosol        |
| 12              | 14              | TIR(c)                 | Toll/interleukin-1 receptor domain                                                                                                        | Cytosol        |
| 13              | 14              | TRAF6-D(c)             | tumor necrosis factor receptor associated factor 6 (dimer)                                                                                | Cytosol        |
| 14              | 14              | pai1345p_hs(c)         | phosphatidylinositol-3                                                                                                                    | Cytosol        |
| 15              | 14              | TLRL4(e)               | Toll-like receptor 4 ligand (generic)                                                                                                     | Extra-organism |
| 16              | 13              | NFKB(p50/p65)(c)       | NF-kappa-B (p50/p65) complex                                                                                                              | Cytosol        |
| 17              | 12              | TIR_MYD(c)             | TIR/MyD88(dimer) complex                                                                                                                  | Cytosol        |
| 18              | 12              | ca2(c)                 | Calcium                                                                                                                                   | Cytosol        |
| 19              | 11              | dag_hs(c)              | diacylglycerol (homo sapiens)                                                                                                             | Cytosol        |
| 20              | 11              | CBP(n)                 | cAMP responsive element binding protein 1 binding protein                                                                                 | Nucleus        |
| 21              | 10              | MAP3K7IP_TRAF6-2P3U(c) | MAP3K7/IP23/1/TRAF6 (dimer)/Ubc13/Uev1A complex (2 phosphorylated)                                                                        | Cytosol        |
| 22              | 10              | MAP3K7IP_TRAF6-3P3U(c) | MAP3K7/IP23/1/TRAF6 (dimer)/Ubc13/Uev1A complex (3 phosphorylated)                                                                        | Cytosol        |
| 23              | 10              | NFKB(p50)(c)           | NF-kappa-B (p50)                                                                                                                          | Cytosol        |
| 24              | 10              | TLR2(c)                | Toll-like receptor 2                                                                                                                      | Cytosol        |
| 25              | 9               | CD14(c)                | CD14                                                                                                                                      | Cytosol        |
| 26              | 9               | PKCZ(c)                | protein kinase C (zeta isoform)                                                                                                           | Cytosol        |
| 27              | 9               | ps_hs(c)               | phosphatidylserine (homo sapiens)                                                                                                         | Cytosol        |

|    |   |                |                                                                                               |                |
|----|---|----------------|-----------------------------------------------------------------------------------------------|----------------|
| 28 | 9 | MAPK14(n)      | mitogen-activated protein kinase 14                                                           | Nucleus        |
| 29 | 9 | MAPK14-2P(n)   | mitogen-activated protein kinase 14 (2 phosphorylated)                                        | Nucleus        |
| 30 | 8 | NFKB_P5K(c)    | NF-kB P5 kinase                                                                               | Cytosol        |
| 31 | 8 | NFKB_P5K-4P(c) | NF-kB P5 kinase (4 phosphorylated)                                                            | Cytosol        |
| 32 | 8 | RIP2(c)        | receptor-interacting serine-threonine kinase 2                                                | Cytosol        |
| 33 | 8 | TLRL2/6(e)     | Toll-like receptor 2/6 ligand (generic)                                                       | Extra-organism |
| 34 | 8 | MAPK11(n)      | mitogen-activated protein kinase 11                                                           | Nucleus        |
| 35 | 8 | MAPK11-2P(n)   | mitogen-activated protein kinase 11 (2 phosphorylated)                                        | Nucleus        |
| 36 | 7 | AKT(c)         | Akt                                                                                           | Cytosol        |
| 37 | 7 | AKT-2P(c)      | Akt (2 phosphorylated)                                                                        | Cytosol        |
| 38 | 7 | IKKE(c)        | inhibitor of kappa light polypeptide gene enhancer in B-cells kinase epsilon                  | Cytosol        |
| 39 | 7 | IKKE-P(c)      | inhibitor of kappa light polypeptide gene enhancer in B-cells kinase epsilon (phosphorylated) | Cytosol        |
| 40 | 7 | IL1RAP(c)      | interleukin 1 receptor accessory protein                                                      | Cytosol        |
| 41 | 7 | MAP2K4(c)      | mitogen-activated protein kinase kinase 4                                                     | Cytosol        |
| 42 | 7 | MAP2K4-2P(c)   | mitogen-activated protein kinase kinase 4 (2 phosphorylated)                                  | Cytosol        |
| 43 | 7 | MAP3K5(c)      | mitogen-activated protein kinase kinase kinase 5                                              | Cytosol        |
| 44 | 7 | NFKB(p105)(c)  | NF-kappa-B (p105)                                                                             | Cytosol        |
| 45 | 7 | NFKB_P3K(c)    | NF-kB P3 kinase                                                                               | Cytosol        |
| 46 | 7 | NFKB_P3K-4P(c) | NF-kB P3 kinase (4 phosphorylated)                                                            | Cytosol        |
| 47 | 7 | P47PHOX(c)     | p47-phox protein                                                                              | Cytosol        |
| 48 | 7 | PKAC(c)        | protein kinase A                                                                              | Cytosol        |
| 49 | 7 | PKCZ-P(c)      | protein kinase C (zeta isoform) (phosphorylated)                                              | Cytosol        |
| 50 | 7 | RAC1_GTP(c)    | Rho family small GTP-binding protein Rac1/gtp complex                                         | Cytosol        |
| 51 | 7 | RAF1(c)        | Raf-1                                                                                         | Cytosol        |
| 52 | 7 | SRCK(c)        | Src family kinase (generic)                                                                   | Cytosol        |
| 53 | 7 | MSK1(n)        | mitogen- and stress-activated protein kinase 1                                                | Nucleus        |
| 54 | 6 | A1901_DEGR2(c) | A1901 degraded 2                                                                              | Cytosol        |
| 55 | 6 | BTRCP2(c)      | beta-transducin repeat containing protein 2                                                   | Cytosol        |
| 56 | 6 | MAP3K1-P(c)    | mitogen-activated protein kinase kinase kinase 1 (phosphorylated)                             | Cytosol        |
| 57 | 6 | MAP3K3(c)      | mitogen-activated protein kinase kinase kinase 3                                              | Cytosol        |

|    |   |                       |                                                                        |         |
|----|---|-----------------------|------------------------------------------------------------------------|---------|
| 58 | 6 | MAPK3/1(c)            | mitogen-activated protein kinase 3/1                                   | Cytosol |
| 59 | 6 | MAPK3/1-2P(c)         | mitogen-activated protein kinase 3/1 (2 phosphorylated)                | Cytosol |
| 60 | 6 | MD2(c)                | MD-2                                                                   | Cytosol |
| 61 | 6 | NFKB(p50/p65)-5P(c)   | NF-kappa-B (p50/p65) complex (5 phosphorylated)                        | Cytosol |
| 62 | 6 | NFKB(p65)(c)          | NF-kappa-B (p65)                                                       | Cytosol |
| 63 | 6 | NFKB_P1K(c)           | NF-kB P1 kinase                                                        | Cytosol |
| 64 | 6 | NFKB_P1K-5P(c)        | NF-kB P1 kinase (5 phosphorylated)                                     | Cytosol |
| 65 | 6 | P47PHOX-8P(c)         | p47-phox protein (8 phosphorylated)                                    | Cytosol |
| 66 | 6 | PAK1(c)               | p21/Cdc42/Rac1-activated kinase 1                                      | Cytosol |
| 67 | 6 | PDK1(c)               | phosphoinositide-dependent kinase 1                                    | Cytosol |
| 68 | 6 | PDK1_pail345p_hs-P(c) | phosphoinositide-dependent kinase 1 (activated)                        | Cytosol |
| 69 | 6 | RAB5_GTP(c)           | Ras-associated GTP-binding protein Rab5/gtp complex                    | Cytosol |
| 70 | 6 | TIRAP(c)              | toll-interleukin 1 receptor (TIR) domain containing adaptor protein    | Cytosol |
| 71 | 6 | TLR10(c)              | Toll-like receptor 10                                                  | Cytosol |
| 72 | 6 | gdp(c)                | GDP                                                                    | Cytosol |
| 73 | 6 | gtp(c)                | GTP                                                                    | Cytosol |
| 74 | 6 | pa_hs(c)              | phosphatidic acid (homo sapiens)                                       | Cytosol |
| 75 | 6 | CREB_CRE-P(n)         | CREB(dimer)/CRE site complex (phosphorylated)                          | Nucleus |
| 76 | 6 | MAPK3/1-2PD(n)        | mitogen-activated protein kinase 3/1 (2 phosphorylated)                | Nucleus |
| 77 | 6 | MAPK3/1-D(n)          | mitogen-activated protein kinase 3/1 (dimer)                           | Nucleus |
| 78 | 5 | CDC42_GTP(c)          | Cdc42/GTP complex                                                      | Cytosol |
| 79 | 5 | GENERIC_PP(c)         | unknown phosphatase (generic)                                          | Cytosol |
| 80 | 5 | GENERIC_PP-P(c)       | unknown phosphatase (generic) (phosphorylated)                         | Cytosol |
| 81 | 5 | GSK3B(c)              | glycogen synthase kinase 3 beta                                        | Cytosol |
| 82 | 5 | GSK3B-P(c)            | glycogen synthase kinase 3 beta (phosphorylated)                       | Cytosol |
| 83 | 5 | IL1R1(c)              | interleukin 1 receptor                                                 | Cytosol |
| 84 | 5 | IL1R1/L/AP(c)         | interleukin 1 receptor type 1/ligand/accessory protein complex         | Cytosol |
| 85 | 5 | IL1R1_LIG(c)          | interleukin 1 receptor                                                 | Cytosol |
| 86 | 5 | IRAK1_MAP3K3-4P3U(c)  | IRAK1/TIFA/TRAF6 (dimer)/Ubc13/Uev1A/MAP3K3 complex (3 phosphorylated) | Cytosol |
| 87 | 5 | IRAK1_TIFA-2P(c)      | IRAK1/TIFA/TRAF6 (dimer)/Ubc13/Uev1A complex (2 phosphorylated)        | Cytosol |

|     |   |                     |                                                                                                            |                |
|-----|---|---------------------|------------------------------------------------------------------------------------------------------------|----------------|
| 88  | 5 | MAP2K1(c)           | mitogen-activated protein kinase kinase 1                                                                  | Cytosol        |
| 89  | 5 | MAP3K8(p58)-P(c)    | mitogen-activated protein kinase kinase kinase 8 (p58) (phosphorylated)                                    | Cytosol        |
| 90  | 5 | MYD88_IRF7(c)       | MyD88 (dimer)/TRAF6 (dimer)/IRF7 complex                                                                   | Cytosol        |
| 91  | 5 | NFKB(p105)-2PU(c)   | NF-kappa-B (p105) (2 phosphorylated)                                                                       | Cytosol        |
| 92  | 5 | NFKB(p50/p65)-P5(c) | NF-kappa-B (p50/p65) complex (phosphorylated) 5                                                            | Cytosol        |
| 93  | 5 | NFKB_IKBA(c)        | NF-kappa-B (p50/p65)/I-kappa-B-alpha complex                                                               | Cytosol        |
| 94  | 5 | NFKB_P2K(c)         | NF-kB P2 kinase                                                                                            | Cytosol        |
| 95  | 5 | NFKB_P2K-P(c)       | NF-kB P2 kinase (phosphorylated)                                                                           | Cytosol        |
| 96  | 5 | NFKB_P4K(c)         | NF-kB P4 kinase                                                                                            | Cytosol        |
| 97  | 5 | NFKB_P4K-P(c)       | NF-kB P4 kinase (phosphorylated)                                                                           | Cytosol        |
| 98  | 5 | PAK1P-P(c)          | p21/Cdc42/Rac1-activated kinase 1 (activated)                                                              | Cytosol        |
| 99  | 5 | PI3K1A(c)           | phosphoinositide 3-kinase                                                                                  | Cytosol        |
| 100 | 5 | PI3K1A-P(c)         | phosphoinositide 3-kinase                                                                                  | Cytosol        |
| 101 | 5 | RAS_GTP(c)          | Ras family small GTP-binding protein (generic)/gtp complex                                                 | Cytosol        |
| 102 | 5 | SIGIRR(c)           | single immunoglobulin IL-1R-related molecule                                                               | Cytosol        |
| 103 | 5 | SRCK-P(c)           | Src family kinase (generic) (phosphorylated)                                                               | Cytosol        |
| 104 | 5 | TBK1(c)             | TRAF family member-associated NFKB activator-binding kinase 1                                              | Cytosol        |
| 105 | 5 | TBK1-P(c)           | TRAF family member-associated NFKB activator-binding kinase 1 (phosphorylated)                             | Cytosol        |
| 106 | 5 | TICAM1(c)           | toll-like receptor adaptor molecule 1                                                                      | Cytosol        |
| 107 | 5 | TICAM1P(c)          | toll-like receptor adaptor molecule 1 (activated)                                                          | Cytosol        |
| 108 | 5 | TIFA(c)             | tumor necrosis factor (TNF)-associated factor (TRAF)-interacting protein with a forkhead-associated domain | Cytosol        |
| 109 | 5 | TIR_TIRAP(c)        | TIRAP-bound toll-interleukin 1 receptor domain                                                             | Cytosol        |
| 110 | 5 | TLR4(c)             | Toll-like receptor 4                                                                                       | Cytosol        |
| 111 | 5 | TOLLIP(c)           | Toll interacting protein                                                                                   | Cytosol        |
| 112 | 5 | mi145p(c)           | 1D-myo-Inositol 1                                                                                          | Cytosol        |
| 113 | 5 | pail3p_hs(c)        | 1-Phosphatidyl-1D-myo-inositol 3-phosphate (Homo sapiens)                                                  | Cytosol        |
| 114 | 5 | TLRL7(e)            | Toll-like receptor 7 ligand (generic)                                                                      | Extra-organism |
| 115 | 5 | CREB_CRE(n)         | CREB (dimer)/CRE site complex                                                                              | Nucleus        |

|     |   |                       |                                                                        |         |
|-----|---|-----------------------|------------------------------------------------------------------------|---------|
| 116 | 5 | ELK1(n)               | ELK1 (protein)                                                         | Nucleus |
| 117 | 5 | ELK1-2P(n)            | ELK1 (2 phosphorylated)                                                | Nucleus |
| 118 | 5 | FOS(n)                | c-Fos (protein)                                                        | Nucleus |
| 119 | 5 | KB_SITE(n)            | kappa-B site (gene)                                                    | Nucleus |
| 120 | 5 | MSK1-5P(n)            | mitogen- and stress-activated protein kinase 1 (5 phosphorylated)      | Nucleus |
| 121 | 5 | NFKB(p50/p65)-5P(n)   | NF-kappa-B (p50/p65) complex (5 phosphorylated)                        | Nucleus |
| 122 | 5 | NFKB(p50/p65)-5P3A(n) | NF-kappa-B (p50/p65) complex (5 phosphorylated)                        | Nucleus |
| 123 | 5 | NFKB(p50/p65)-5P5A(n) | NF-kappa-B (p50/p65) complex (5 phosphorylated)                        | Nucleus |
| 124 | 5 | accoa(n)              | Acetyl-CoA                                                             | Nucleus |
| 125 | 5 | coa(n)                | Coenzyme A                                                             | Nucleus |
| 126 | 5 | h(n)                  | H+                                                                     | Nucleus |
| 127 | 4 | 14-3-3(c)             | 14-3-3                                                                 | Cytosol |
| 128 | 4 | A20(c)                | A20 (protein)                                                          | Cytosol |
| 129 | 4 | BTK(c)                | Bruton agammaglobulinemia tyrosine kinase                              | Cytosol |
| 130 | 4 | BTK_pail345p_hs(c)    | Bruton's tyrosine kinase/phosphoinositol 3                             | Cytosol |
| 131 | 4 | BTK_pail345p_hs-2P(c) | Bruton agammaglobulinemia tyrosine kinase (2 phosphorylated)           | Cytosol |
| 132 | 4 | CAM_CAMK2(c)          | Calmodulin/calmodulin-dependent kinase 2 complex                       | Cytosol |
| 133 | 4 | CAM_CAMK2-P(c)        | Calmodulin/calmodulin-dependent kinase 2 (phosphorylated)              | Cytosol |
| 134 | 4 | CK2(c)                | Casein kinase 2                                                        | Cytosol |
| 135 | 4 | CK2-P(c)              | casein kinase 2 (phosphorylated)                                       | Cytosol |
| 136 | 4 | IKBA(c)               | I-kappa-B-alpha (protein)                                              | Cytosol |
| 137 | 4 | IKBA-2P2U(c)          | I-kappa-B-alpha (2 phosphorylated)                                     | Cytosol |
| 138 | 4 | IKBB(c)               | I-kappa-B-beta                                                         | Cytosol |
| 139 | 4 | IRAK1(c)              | interleukin-1 receptor associated kinase 1                             | Cytosol |
| 140 | 4 | IRAK1_MAP3K3-2P3U(c)  | IRAK1/TIFA/TRAF6 (dimer)/Ubc13/Uev1A/MAP3K3 complex (2 phosphorylated) | Cytosol |
| 141 | 4 | IRAK1_MAP3K5(c)       | IRAK1/TIFA/TRAF6 (dimer)/Ubc13/Uev1A/MAP3K5 complex (3 phosphorylated) | Cytosol |
| 142 | 4 | IRF7(c)               | interferon regulatory factor 7                                         | Cytosol |
| 143 | 4 | LBP(c)                | lipopolysaccharide binding protein                                     | Cytosol |
| 144 | 4 | MAP2K3(c)             | mitogen-activated protein kinase kinase 3                              | Cytosol |
| 145 | 4 | MAP2K3-2P(c)          | mitogen-activated protein kinase kinase 3 (2 phosphorylated)           | Cytosol |
| 146 | 4 | MAP2K6(c)             | mitogen-activated protein kinase kinase 6                              | Cytosol |

|     |   |                     |                                                                    |         |
|-----|---|---------------------|--------------------------------------------------------------------|---------|
| 147 | 4 | MAP2K6-P(c)         | mitogen-activated protein kinase kinase 6 (phosphorylated)         | Cytosol |
| 148 | 4 | MAP2K7(c)           | mitogen-activated protein kinase kinase 7                          | Cytosol |
| 149 | 4 | MAP2K7-2P(c)        | mitogen-activated protein kinase kinase 7 (2 phosphorylation)      | Cytosol |
| 150 | 4 | MAP3K14(c)          | mitogen-activated protein kinase kinase kinase 14                  | Cytosol |
| 151 | 4 | MAP3K14-P(c)        | mitogen-activated protein kinase kinase kinase 14 (phosphorylated) | Cytosol |
| 152 | 4 | MAP3K8(p52)(c)      | mitogen-activated protein kinase kinase kinase 8 (p52)             | Cytosol |
| 153 | 4 | MAP3K8(p58)(c)      | mitogen-activated protein kinase kinase kinase 8 (p58)             | Cytosol |
| 154 | 4 | MAPK14(c)           | mitogen-activated protein kinase 14                                | Cytosol |
| 155 | 4 | MAPK14-2P(c)        | mitogen-activated protein kinase 14 (2 phosphorylated)             | Cytosol |
| 156 | 4 | MBP(c)              | myelin basic protein                                               | Cytosol |
| 157 | 4 | MBP-P(c)            | myelin basic protein (phosphorylated)                              | Cytosol |
| 158 | 4 | MKNK1(c)            | MAP kinase interacting serine/threonine kinase 1                   | Cytosol |
| 159 | 4 | MKNK1-P(c)          | MAP kinase interacting serine/threonine kinase 1                   | Cytosol |
| 160 | 4 | NFKB(p105)-2P(c)    | NF-kappa-B (p105) (2 phosphorylated)                               | Cytosol |
| 161 | 4 | NFKB(p50/p65)-P(c)  | NF-kappa-B (p50/p65) complex (phosphorylated)                      | Cytosol |
| 162 | 4 | NFKB(p50/p65)-P3(c) | NF-kappa-B (p50/p65) complex (phosphorylated) 3                    | Cytosol |
| 163 | 4 | NFKB_IKBA-2P(c)     | NF-kappa-B (p50/p65)/I-kappa-B-alpha complex (2 phosphorylated)    | Cytosol |
| 164 | 4 | NFKB_IKBA-2P2U(c)   | NF-kappa-B (p50/p65)/I-kappa-B-alpha complex (2 phosphorylated)    | Cytosol |
| 165 | 4 | NOD1(c)             | nucleotide-binding oligomerization domain protein 1                | Cytosol |
| 166 | 4 | NOD1P(c)            | nucleotide-binding oligomerization domain protein 1 (activated)    | Cytosol |
| 167 | 4 | PKAC-P(c)           | protein kinase A                                                   | Cytosol |
| 168 | 4 | PKR-D(c)            | double stranded RNA-dependent protein kinase (dimer)               | Cytosol |
| 169 | 4 | PP2A_ABC(c)         | Protein Phosphatase 2A (A                                          | Cytosol |
| 170 | 4 | PP2A_ABC-P(c)       | Protein phosphatase 2A (A                                          | Cytosol |
| 171 | 4 | TIR_MYD_IRAK4(c)    | TIR/MyD88(dimer)/IRAK4 complex                                     | Cytosol |
| 172 | 4 | TIR_TIRAP_IRAK4(c)  | TIR/TIRAP/MyD88(dimer)/IRAK4 complex                               | Cytosol |

|     |   |                  |                                                                                |                |
|-----|---|------------------|--------------------------------------------------------------------------------|----------------|
| 173 | 4 | TIR_TIRAP_MYD(c) | TIR domain/TIRAP/MyD88(dimer) complex                                          | Cytosol        |
| 174 | 4 | TLR1(c)          | Toll-like receptor 1                                                           | Cytosol        |
| 175 | 4 | TLR2/L-D(c)      | Toll-like receptor 2 (dimer) ligand/CD14 complex                               | Cytosol        |
| 176 | 4 | TLR4/L_MD2-D(c)  | Toll-like receptor 4 (dimer) ligand/MD-2/CD14/LBP complex                      | Cytosol        |
| 177 | 4 | TLR5(c)          | Toll-like receptor 5                                                           | Cytosol        |
| 178 | 4 | TLRL2(c)         | Toll-like receptor 2 ligand (generic)                                          | Cytosol        |
| 179 | 4 | TOLLIP-P(c)      | Toll interacting protein (phosphorylated)                                      | Cytosol        |
| 180 | 4 | TRAF6(c)         | Tumor necrosis factor receptor associated factor 6                             | Cytosol        |
| 181 | 4 | TRD3A(c)         | Triad3A protein                                                                | Cytosol        |
| 182 | 4 | TRIP6(c)         | thyroid hormone receptor interactor 6                                          | Cytosol        |
| 183 | 4 | UBC13(c)         | ubiquitin-conjugating enzyme E2N (UBC13 homolog)                               | Cytosol        |
| 184 | 4 | UEV1A(c)         | ubiquitin-conjugating enzyme E2 variant 1                                      | Cytosol        |
| 185 | 4 | VAV1(c)          | vav 1 proto-oncogene                                                           | Cytosol        |
| 186 | 4 | VAV1-P(c)        | vav 1 proto-oncogene (phosphorylated)                                          | Cytosol        |
| 187 | 4 | ac(c)            | Acetate                                                                        | Cytosol        |
| 188 | 4 | pai145p_hs(c)    | phosphatidylinositol 4                                                         | Cytosol        |
| 189 | 4 | 26dap-LL(e)      | LL-2                                                                           | Extra-organism |
| 190 | 4 | IL1R1_LIG(e)     | interleukin 1 receptor                                                         | Extra-organism |
| 191 | 4 | ATF2(n)          | Activating transcription factor 2                                              | Nucleus        |
| 192 | 4 | ATF2-P(n)        | Activating transcription factor 2 (phosphorylated)                             | Nucleus        |
| 193 | 4 | CAM_CAMK2(n)     | Calmodulin/calmodulin-dependent kinase 2 complex                               | Nucleus        |
| 194 | 4 | CAM_CAMK2-P(n)   | Calmodulin/calmodulin-dependent kinase 2 (phosphorylated)                      | Nucleus        |
| 195 | 4 | CRE_GENE(n)      | cAMP responsive element site                                                   | Nucleus        |
| 196 | 4 | FOS-6P(n)        | c-Fos (6 phosphorylated)                                                       | Nucleus        |
| 197 | 4 | IKBA(n)          | I-kappa-B-alpha (protein)                                                      | Nucleus        |
| 198 | 4 | MAPK8(n)         | mitogen-activated protein kinase 8                                             | Nucleus        |
| 199 | 4 | MAPK8-2P(n)      | mitogen-activated protein kinase 8 (2 phosphorylated)                          | Nucleus        |
| 200 | 4 | MAPKAPK2(n)      | mitogen-activated protein kinase activated protein kinase 2                    | Nucleus        |
| 201 | 4 | MAPKAPK2-2P(n)   | mitogen-activated protein kinase activated protein kinase 2 (2 phosphorylated) | Nucleus        |
| 202 | 4 | MSK1-2P(n)       | mitogen- and stress-activated protein kinase 1 (2 phosphorylated)              | Nucleus        |
| 203 | 4 | UBIQ(n)          | Ubiquitin                                                                      | Nucleus        |

|     |   |                         |                                                                                                                                           |         |
|-----|---|-------------------------|-------------------------------------------------------------------------------------------------------------------------------------------|---------|
| 204 | 4 | adp(n)                  | ADP                                                                                                                                       | Nucleus |
| 205 | 4 | atp(n)                  | ATP                                                                                                                                       | Nucleus |
| 206 | 4 | h2o(n)                  | H2O                                                                                                                                       | Nucleus |
| 207 | 4 | TLR9(v)                 | Toll-like receptor 9                                                                                                                      | Vacuole |
| 208 | 4 | TLR9/L-D(v)             | Toll-like receptor 9 (dimer) ligand complex                                                                                               | Vacuole |
| 209 | 3 | 26dap-LL(c)             | LL-2                                                                                                                                      | Cytosol |
| 210 | 3 | A2129_DEGR(c)           | A2129 (degraded)                                                                                                                          | Cytosol |
| 211 | 3 | BCL3(c)                 | B-cell CLL/lymphoma 3                                                                                                                     | Cytosol |
| 212 | 3 | CASP9(c)                | caspase 9                                                                                                                                 | Cytosol |
| 213 | 3 | DSRNA(c)                | Double stranded RNA                                                                                                                       | Cytosol |
| 214 | 3 | EEA1(c)                 | early endosome antigen 1                                                                                                                  | Cytosol |
| 215 | 3 | FADD(c)                 | Fas (TNFRSF6)-associated via death domain                                                                                                 | Cytosol |
| 216 | 3 | FADD_PCASP8(c)          | Fas-associated death domain/pro-caspase 8 complex                                                                                         | Cytosol |
| 217 | 3 | GENERIC_DA(c)           | unknown deacetylase (generic)                                                                                                             | Cytosol |
| 218 | 3 | GENERIC_DA-A(c)         | unknown deacetylase (generic) (acetylated)                                                                                                | Cytosol |
| 219 | 3 | IKK-P(c)                | inhibitor of kappa light polypeptide gene enhancer in B-cells kinase alpha(dimer)/beta(dimer)/gamma (tetramer) complex (2 phosphorylated) | Cytosol |
| 220 | 3 | IL1R1/L/AP-P(c)         | interleukin 1 receptor type 1/ligand/accessory protein complex (phosphorylated)                                                           | Cytosol |
| 221 | 3 | IRAK1-2PU(c)            | interleukin-1 receptor associated kinase 1 (2 phosphorylated)                                                                             | Cytosol |
| 222 | 3 | IRAK1C_TOLLIP(c)        | IRAK1C/TOLLIP complex                                                                                                                     | Cytosol |
| 223 | 3 | IRAK1_MAP3K3-3P3U(c)    | IRAK1/TIFA/TRAF6 (dimer)/Ubc13/Uev1A/MAP3K3 complex (3 phosphorylated)                                                                    | Cytosol |
| 224 | 3 | IRAK1_TOLLIP(c)         | IRAK1/TOLLIP complex                                                                                                                      | Cytosol |
| 225 | 3 | IRAK4(c)                | Interleukin-1 receptor associated kinase 4                                                                                                | Cytosol |
| 226 | 3 | IRAK_MYD_TIR-2P(c)      | IRAK1/IRAK4/MyD88 (dimer)/TIR complex (2 phosphorylated)                                                                                  | Cytosol |
| 227 | 3 | IRF3(c)                 | interferon regulatory factor 3                                                                                                            | Cytosol |
| 228 | 3 | IRF3-2P(c)              | interferon regulatory factor 3 (2 phosphorylated)                                                                                         | Cytosol |
| 229 | 3 | IRF7-2P(c)              | interferon regulatory factor 7 (2 phosphorylated)                                                                                         | Cytosol |
| 230 | 3 | KSR1_RAF1_MAPK3/1-4P(c) | KSR1/MAP2K1/MAPK3/1/Raf-1 complex (4 phosphorylated)                                                                                      | Cytosol |
| 231 | 3 | KSR1_RAF1_MAPK3/1-5P(c) | KSR1/MAP2K1/MAPK3/1/Raf-1 complex (5 phosphorylated)                                                                                      | Cytosol |
| 232 | 3 | MAP2K1-2P(c)            | mitogen-activated protein kinase kinase 1 (2 phosphorylated)                                                                              | Cytosol |



|     |   |                        |                                                                                |         |
|-----|---|------------------------|--------------------------------------------------------------------------------|---------|
| 233 | 3 | MAP3K1(c)              | mitogen-activated protein kinase kinase kinase 1                               | Cytosol |
| 234 | 3 | MAP3K5-P(c)            | mitogen-activated protein kinase kinase kinase 5 (phosphorylated)              | Cytosol |
| 235 | 3 | MAP3K7IP_TRAF6-5P3U(c) | MAP3K7/IP23/1/TRAF6 (dimer)/Ubc13/Uev1A complex (5 phosphorylated)             | Cytosol |
| 236 | 3 | MAP3K7IP_TRAF6-6P3U(c) | MAP3K7/IP23/1/TRAF6 (dimer)/Ubc13/Uev1A complex (6 phosphorylated)             | Cytosol |
| 237 | 3 | MAPK11(c)              | mitogen-activated protein kinase 11                                            | Cytosol |
| 238 | 3 | MAPK11-2P(c)           | mitogen-activated protein kinase 11 (2 phosphorylated)                         | Cytosol |
| 239 | 3 | MAPKAPK2-2P(c)         | mitogen-activated protein kinase activated protein kinase 2 (2 phosphorylated) | Cytosol |
| 240 | 3 | MSK1(c)                | mitogen- and stress-activated protein kinase 1                                 | Cytosol |
| 241 | 3 | MSK1-5P(c)             | mitogen- and stress-activated protein kinase 1 (5 phosphorylated)              | Cytosol |
| 242 | 3 | MYD88(c)               | Myeloid differentiation primary response 88                                    | Cytosol |
| 243 | 3 | NFKB(p50)-PD(c)        | NF-kappa-B (p50) (phosphorylated)                                              | Cytosol |
| 244 | 3 | NFKB_PKAC(c)           | NF-kappa-B (p50/p65)/protein kinase A (catalytic subunit) complex              | Cytosol |
| 245 | 3 | NOD2(c)                | nucleotide-binding oligomerization domain protein 2                            | Cytosol |
| 246 | 3 | NOD2P(c)               | nucleotide-binding oligomerization domain protein 2 (activated)                | Cytosol |
| 247 | 3 | NSF(c)                 | N-ethylmaleimide-sensitive factor                                              | Cytosol |
| 248 | 3 | P40PHOX(c)             | p40-phox protein                                                               | Cytosol |
| 249 | 3 | P67PHOX(c)             | p67-phox protein                                                               | Cytosol |
| 250 | 3 | PAK1P(c)               | p21/Cdc42/Rac1-activated kinase 1 (activated)                                  | Cytosol |
| 251 | 3 | PCASP8(c)              | procaspase 8                                                                   | Cytosol |
| 252 | 3 | PCASP9(c)              | procaspase 9                                                                   | Cytosol |
| 253 | 3 | PKCA(c)                | protein kinase C                                                               | Cytosol |
| 254 | 3 | PKCA-3P(c)             | protein kinase C                                                               | Cytosol |
| 255 | 3 | PKCB2(c)               | protein kinase C                                                               | Cytosol |
| 256 | 3 | PKCB2-3P(c)            | protein kinase C                                                               | Cytosol |
| 257 | 3 | PKR(c)                 | double stranded RNA-dependent protein kinase                                   | Cytosol |
| 258 | 3 | PKR-2PD(c)             | double stranded RNA-dependent protein kinase (2 phosphorylated)                | Cytosol |
| 259 | 3 | PLNO1(c)               | Pellino 1                                                                      | Cytosol |
| 260 | 3 | PRE_IL1A(c)            | pre interleukin 1 alpha                                                        | Cytosol |

|     |   |             |                                                                          |                |
|-----|---|-------------|--------------------------------------------------------------------------|----------------|
| 261 | 3 | RAB5_GDP(c) | Ras-associated GTP-binding protein Rab5/gdp complex                      | Cytosol        |
| 262 | 3 | RAC1_GDP(c) | Rho family small GTP-binding protein Rac1/gdp complex                    | Cytosol        |
| 263 | 3 | RAF1-2P(c)  | Raf-1 (2 phosphorylated)                                                 | Cytosol        |
| 264 | 3 | RAF1-4P(c)  | Raf-1 (4 phosphorylated)                                                 | Cytosol        |
| 265 | 3 | RAF1-P(c)   | Raf-1 (phosphorylated)                                                   | Cytosol        |
| 266 | 3 | RAS_GDP(c)  | Ras family small GTP-binding protein (generic)/gdp complex               | Cytosol        |
| 267 | 3 | RIP1(c)     | receptor (TNFRSF)-interacting serine-threonine kinase 1                  | Cytosol        |
| 268 | 3 | RKIP(c)     | Raf kinase inhibitory protein                                            | Cytosol        |
| 269 | 3 | STLR2(c)    | soluble TLR2                                                             | Cytosol        |
| 270 | 3 | STXN13(c)   | Syntaxin 13                                                              | Cytosol        |
| 271 | 3 | TLRL3(c)    | Toll-like receptor 3 ligand (generic)                                    | Cytosol        |
| 272 | 3 | TLRL4(c)    | Toll-like receptor 4 ligand (generic)                                    | Cytosol        |
| 273 | 3 | TLRL7(c)    | Toll-like receptor 7 ligand (generic)                                    | Cytosol        |
| 274 | 3 | TLRL8(c)    | Toll-like receptor 8 ligand (generic)                                    | Cytosol        |
| 275 | 3 | TLRL9(c)    | Toll-like receptor 9 ligand (generic)                                    | Cytosol        |
| 276 | 3 | TRAF6-UD(c) | tumor necrosis factor (TNF) receptor-associated factor 6 (ubiquitinated) | Cytosol        |
| 277 | 3 | TRXOX(c)    | oxidized thioredoxin (Homo sapiens)                                      | Cytosol        |
| 278 | 3 | TRXRED(c)   | reduced thioredoxin (Homo sapiens)                                       | Cytosol        |
| 279 | 3 | h2o2(c)     | Hydrogen peroxide                                                        | Cytosol        |
| 280 | 3 | DSRNA(e)    | Double stranded RNA                                                      | Extra-organism |
| 281 | 3 | HSP70(e)    | Heat shock protein 70                                                    | Extra-organism |
| 282 | 3 | IMQ(e)      | Imidazoquinoline                                                         | Extra-organism |
| 283 | 3 | LPS_HS(e)   | Lipopolysaccharide (Homo sapiens)                                        | Extra-organism |
| 284 | 3 | LTA(e)      | Lipoteichoic acid                                                        | Extra-organism |
| 285 | 3 | MRAP(e)     | Mannuronic acid polymer                                                  | Extra-organism |
| 286 | 3 | PSM(e)      | Phenol-soluble modulins                                                  | Extra-organism |
| 287 | 3 | SSRNA(e)    | Single stranded RNA                                                      | Extra-organism |
| 288 | 3 | TLRL1/2(e)  | Toll-like receptor 1/2 ligand (generic)                                  | Extra-organism |
| 289 | 3 | TLRL11(e)   | Toll-like receptor 11 ligand (generic)                                   | Extra-organism |
| 290 | 3 | TLRL3(e)    | Toll-like receptor 3 ligand (generic)                                    | Extra-organism |
| 291 | 3 | TLRL8(e)    | Toll-like receptor 8 ligand (generic)                                    | Extra-organism |
| 292 | 3 | TLRL9(e)    | Toll-like receptor 9 ligand (generic)                                    | Extra-organism |
| 293 | 3 | ZMS(e)      | Zymosan                                                                  | Extra-organism |
| 294 | 3 | ac(e)       | Acetate                                                                  | Extra-organism |
| 295 | 3 | h(e)        | H+                                                                       | Extra-organism |
| 296 | 3 | TLR3(l)     | Toll-like receptor 3                                                     | Lysosome       |

|     |   |                         |                                                                              |                       |
|-----|---|-------------------------|------------------------------------------------------------------------------|-----------------------|
| 297 | 3 | TLR3/L-D(l)             | Toll-like receptor 3 (dimer) ligand complex                                  | Lysosome              |
| 298 | 3 | AP1_GENE(n)             | AP-1 (gene)                                                                  | Nucleus               |
| 299 | 3 | CREB_CBP(n)             | CREB (dimer)/CBP complex (2 phosphorylated)                                  | Nucleus               |
| 300 | 3 | CREB_CRE-2P(n)          | CREB/CRE site complex (2 phosphorylated)                                     | Nucleus               |
| 301 | 3 | HDAC3(n)                | histone deacetylase 3                                                        | Nucleus               |
| 302 | 3 | HDAC3-A(n)              | histone deacetylase 3 (acetylated)                                           | Nucleus               |
| 303 | 3 | ISRE(n)                 | interferon stimulated response element                                       | Nucleus               |
| 304 | 3 | JUN(n)                  | c-Jun (protein)                                                              | Nucleus               |
| 305 | 3 | JUN-2P(n)               | c-Jun (2 phosphorylated)                                                     | Nucleus               |
| 306 | 3 | MAP2K3(n)               | mitogen-activated protein kinase kinase 3                                    | Nucleus               |
| 307 | 3 | MAP2K3-2P(n)            | mitogen-activated protein kinase kinase 3 (2 phosphorylated)                 | Nucleus               |
| 308 | 3 | MAP2K6(n)               | mitogen-activated protein kinase kinase 6                                    | Nucleus               |
| 309 | 3 | MAP2K6-P(n)             | mitogen-activated protein kinase kinase 6 (phosphorylated)                   | Nucleus               |
| 310 | 3 | MAPKAPK2-P(n)           | mitogen-activated protein kinase activated protein kinase 2 (phosphorylated) | Nucleus               |
| 311 | 3 | NFKB(p50)(n)            | NF-kappa-B (p50)                                                             | Nucleus               |
| 312 | 3 | NFKB(p50)-PD(n)         | NF-kappa-B (p50) (phosphorylated)                                            | Nucleus               |
| 313 | 3 | NFKB(p50)_BCL3(n)       | NF-kappa-B (p50 dimer)/Bcl-3 complex (2 phosphorylated)                      | Nucleus               |
| 314 | 3 | NFKB(p50/p65)_CBP-5P(n) | NF-kappa-B (p50/p65)/CBP complex (5 phosphorylated)                          | Nucleus               |
| 315 | 3 | NFKB_CBP_KB(n)          | NF-kappa-B (p50/p65)/CREB binding protein/kB site complex (phosphorylated)   | Nucleus               |
| 316 | 3 | NFKB_IKBA-2P(n)         | NF-kappa-B (p50/p65)/I-kappa-B-alpha complex (2 phosphorylated)              | Nucleus               |
| 317 | 3 | NFKB_IKBA-2P2U(n)       | NF-kappa-B (p50/p65)/i-kappa-B-alpha complex (2 phosphorylated)              | Nucleus               |
| 318 | 3 | PKA(n)                  | protein kinase A                                                             | Nucleus               |
| 319 | 3 | PKA-2P(n)               | protein kinase A (2 phosphorylated)                                          | Nucleus               |
| 320 | 3 | PP2A_ABC(n)             | Protein Phosphatase 2A (A)                                                   | Nucleus               |
| 321 | 3 | PP2A_ABC-P(n)           | Protein phosphatase 2A (A)                                                   | Nucleus               |
| 322 | 3 | pi(n)                   | Phosphate                                                                    | Nucleus               |
| 323 | 3 | TLR9(r)                 | Toll-like receptor 9                                                         | Endoplasmic Reticulum |
| 324 | 3 | ca2(r)                  | Calcium                                                                      | Endoplasmic Reticulum |
| 325 | 3 | GP91_P22(v)             | gp91/p22-phox protein complex                                                | Vacuole               |
| 326 | 3 | NSF_EEA1_RAB5(v)        | NSF/Syntaxin 13/EEA1 (dimer)/PI3P/Rab5/GTP complex                           | Vacuole               |

|     |   |                       |                                                                              |         |
|-----|---|-----------------------|------------------------------------------------------------------------------|---------|
| 327 | 3 | TLR7(v)               | Toll-like receptor 7                                                         | Vacuole |
| 328 | 3 | TLR7/L-D(v)           | Toll-like receptor 7 (dimer) ligand complex                                  | Vacuole |
| 329 | 3 | TLR8(v)               | Toll-like receptor 8                                                         | Vacuole |
| 330 | 3 | TLR8/L-D(v)           | Toll-like receptor 8 (dimer) ligand complex                                  | Vacuole |
| 331 | 2 | 14-3-3_KSR1(c)        | 14-3-3/KSR1/MAP2K1 complex                                                   | Cytosol |
| 332 | 2 | 14-3-3_RAF1(c)        | 14-3-3/Raf-1 complex (phosphorylated)                                        | Cytosol |
| 333 | 2 | A001_DEGR(c)          | A001 degraded                                                                | Cytosol |
| 334 | 2 | A1115_DEGR(c)         | A1115 (degraded)                                                             | Cytosol |
| 335 | 2 | A1146_DEGR(c)         | A1146 (degraded)                                                             | Cytosol |
| 336 | 2 | A1159_DEGR(c)         | A1159 (degraded)                                                             | Cytosol |
| 337 | 2 | A153_DEGR(c)          | A153 (degraded)                                                              | Cytosol |
| 338 | 2 | A1901_DEGR(c)         | A1901 (degraded)                                                             | Cytosol |
| 339 | 2 | A2069_DEGR(c)         | A2069 (degraded)                                                             | Cytosol |
| 340 | 2 | A2156_DEGR(c)         | A2156 (degraded)                                                             | Cytosol |
| 341 | 2 | A2382_DEGR(c)         | A2382 (degraded)                                                             | Cytosol |
| 342 | 2 | A385_DEGR(c)          | A385 (degraded)                                                              | Cytosol |
| 343 | 2 | A399_DEGR(c)          | A399 (degraded)                                                              | Cytosol |
| 344 | 2 | A399_DEGR2(c)         | A399 (degraded) (unphosphorylated)                                           | Cytosol |
| 345 | 2 | A454_DEGR(c)          | A454 (degraded)                                                              | Cytosol |
| 346 | 2 | A523_DEGR(c)          | A523 (degraded)                                                              | Cytosol |
| 347 | 2 | A796_DEGR(c)          | A796 (degraded)                                                              | Cytosol |
| 348 | 2 | A839_DEGR(c)          | A839 (degraded)                                                              | Cytosol |
| 349 | 2 | ABIN(c)               | A20-binding inhibitor of NF-kB activation                                    | Cytosol |
| 350 | 2 | ABIN_A20(c)           | ABIN/A20 complex                                                             | Cytosol |
| 351 | 2 | AJUBA(c)              | Ajuba                                                                        | Cytosol |
| 352 | 2 | AJUBA_CPX-2P3U(c)     | Ajuba/p62/IRAK1/TRAF6 (dimer)/TIFA/Ubc13/Uev1A/PKC z complex (2 phos, 3 ubi) | Cytosol |
| 353 | 2 | AJUBA_CPX-3P3U(c)     | Ajuba/p62/IRAK1/TRAF6 (dimer)/TIFA/Ubc13/Uev1A/PKC z complex (3 phos, 3 ubi) | Cytosol |
| 354 | 2 | AKT_pail345p_hs(c)    | Akt/phosphatidylinositol 3-phosphate complex                                 | Cytosol |
| 355 | 2 | AKT_pail345p_hs-2P(c) | Akt/phosphatidylinositol 3-phosphate complex (2 phosphorylated)              | Cytosol |
| 356 | 2 | AKT_pail345p_hs-P(c)  | Akt/phosphatidylinositol 3-phosphate complex (phosphorylated)                | Cytosol |
| 357 | 2 | BTK-2PU(c)            | Bruton agammaglobulinemia tyrosine kinase (2 phosphorylated)                 | Cytosol |
| 358 | 2 | BTK_CBL(c)            | BTK/c-Cbl complex                                                            | Cytosol |
| 359 | 2 | BTK_IBTK(c)           | BTK/IBTK complex                                                             | Cytosol |
| 360 | 2 | BTK_SH3BP5(c)         | BTK/SH3BP5 complex                                                           | Cytosol |
| 361 | 2 | BTK_pail345p_hs-P(c)  | Bruton agammaglobulinemia tyrosine kinase (1 phosphorylated)                 | Cytosol |

|     |   |                |                                                               |         |
|-----|---|----------------|---------------------------------------------------------------|---------|
| 362 | 2 | CALPN(c)       | calpain                                                       | Cytosol |
| 363 | 2 | CALPN_3ca2(c)  | calpain/ca2 complex                                           | Cytosol |
| 364 | 2 | CAM(c)         | Calmodulin 1                                                  | Cytosol |
| 365 | 2 | CAMK2(c)       | Calmodulin-dependent kinase 2                                 | Cytosol |
| 366 | 2 | CAM_3ca2(c)    | Calmodulin (activated)                                        | Cytosol |
| 367 | 2 | CASP1(c)       | caspase 1                                                     | Cytosol |
| 368 | 2 | CASP3(c)       | caspase 3                                                     | Cytosol |
| 369 | 2 | CASP8(c)       | caspase 8                                                     | Cytosol |
| 370 | 2 | CBL(c)         | c-Cbl                                                         | Cytosol |
| 371 | 2 | CBL-P(c)       | c-Cbl (phosphorylated)                                        | Cytosol |
| 372 | 2 | CDC42_GDP(c)   | Cdc42/GDP complex                                             | Cytosol |
| 373 | 2 | CDC42_VAV1(c)  | Cdc42/Vav1 complex                                            | Cytosol |
| 374 | 2 | CTAK1(c)       | MAP/microtubule affinity-regulating kinase 3                  | Cytosol |
| 375 | 2 | CTAK1-P(c)     | MAP/microtubule affinity-regulating kinase 3 (phosphorylated) | Cytosol |
| 376 | 2 | CYLD(c)        | cyldromatosis (turban tumor syndrome)                         | Cytosol |
| 377 | 2 | DAGK(c)        | diacylglycerol kinase (generic)                               | Cytosol |
| 378 | 2 | DAGK-P(c)      | diacylglycerol kinase (phosphorylated)                        | Cytosol |
| 379 | 2 | ECSIT(c)       | ECSIT                                                         | Cytosol |
| 380 | 2 | EEA1-D(c)      | early endosome antigen 1 (dimer)                              | Cytosol |
| 381 | 2 | EIF2A(c)       | eukaryotic translation initiation factor 2                    | Cytosol |
| 382 | 2 | EIF2A-P(c)     | eukaryotic translation initiation factor 2 (phosphorylated)   | Cytosol |
| 383 | 2 | EIF4E(c)       | eukaryotic translation initiation factor 4E                   | Cytosol |
| 384 | 2 | EIF4E-P(c)     | eukaryotic translation initiation factor 4E (phosphorylated)  | Cytosol |
| 385 | 2 | FMAP3K1(c)     | Full length mitogen activated protein kinase kinase kinase 1  | Cytosol |
| 386 | 2 | GENERIC_K(c)   | unknown kinase (generic)                                      | Cytosol |
| 387 | 2 | GENERIC_K-P(c) | unknown kinase (generic) (phosphorylated)                     | Cytosol |
| 388 | 2 | GP91PHOX(c)    | gp91-phox protein                                             | Cytosol |
| 389 | 2 | GSK3B-2P(c)    | glycogen synthase kinase 3 beta (2 phosphorylated)            | Cytosol |
| 390 | 2 | HSP27(c)       | heat shock protein 27kDa                                      | Cytosol |
| 391 | 2 | HSP27-3P(c)    | heat shock protein 27kDa (3 phosphorylated)                   | Cytosol |
| 392 | 2 | IBTK(c)        | inhibitor of Bruton agammaglobulinemia tyrosine kinase        | Cytosol |
| 393 | 2 | IKBB-2P(c)     | I-kappa-B-beta (2 phosphorylated)                             | Cytosol |
| 394 | 2 | IKBB-2P2U(c)   | I-kappa-B-beta (2 phosphorylated)                             | Cytosol |
| 395 | 2 | IKBB-2PU(c)    | I-kappa-B-beta (2 phosphorylated)                             | Cytosol |

|     |   |                         |                                                                                                                                           |         |
|-----|---|-------------------------|-------------------------------------------------------------------------------------------------------------------------------------------|---------|
| 396 | 2 | IKK-3P(c)               | inhibitor of kappa light polypeptide gene enhancer in B-cells kinase alpha(dimer)/beta(dimer)/gamma (tetramer) complex (6 phosphorylated) | Cytosol |
| 397 | 2 | IKK_PKR(c)              | IKK/PKR (dimer) complex                                                                                                                   | Cytosol |
| 398 | 2 | IKK_PKR_TRAF6(c)        | IKK/PKR (dimer)/TRAF6 (dimer) complex                                                                                                     | Cytosol |
| 399 | 2 | IKK_RIP1_TICAM1P(c)     | IKK/RIP1/TICAM1P complex                                                                                                                  | Cytosol |
| 400 | 2 | IKK_RIP2_NOD1P(c)       | IKK/RIP2/NOD1P complex                                                                                                                    | Cytosol |
| 401 | 2 | IKK_RIP2_NOD2P(c)       | IKK/RIP2/NOD2P complex                                                                                                                    | Cytosol |
| 402 | 2 | IKK_RIP2_TRIP6_TRAF2(c) | IKK/RIP2/TRIP6/TRAF2 complex                                                                                                              | Cytosol |
| 403 | 2 | IKK_SRC(c)              | inhibitor of kappa light polypeptide gene enhancer in B-cells kinase alpha/beta/gamma(dimer)/c-Src complex                                | Cytosol |
| 404 | 2 | IL1A(c)                 | interleukin 1 alpha                                                                                                                       | Cytosol |
| 405 | 2 | IL1B(c)                 | interleukin 1 beta                                                                                                                        | Cytosol |
| 406 | 2 | IL1R1/L(c)              | interleukin 1 receptor type 1/ligand complex                                                                                              | Cytosol |
| 407 | 2 | IL1R2(c)                | interleukin 1 receptor                                                                                                                    | Cytosol |
| 408 | 2 | IL1R2/AP(c)             | interleukin 1 receptor type 2/accessory protein complex                                                                                   | Cytosol |
| 409 | 2 | IMPA3(c)                | importin alpha 3                                                                                                                          | Cytosol |
| 410 | 2 | IRAK1C(c)               | Interleukin-1 receptor associated kinase 1c                                                                                               | Cytosol |
| 411 | 2 | IRAK1_ECSIT(c)          | IRAK1/TIFA/TRAF6 (dimer)/Ubc13/Uev1A/ECSIT complex (2 phosphorylated)                                                                     | Cytosol |
| 412 | 2 | IRAK1_ECSIT_FMAP3K1(c)  | IRAK1/TIFA/TRAF6 (dimer)/Ubc13/Uev1A/ECSIT/full length MAP3K1/caspase3 complex (2 phosphorylated)                                         | Cytosol |
| 413 | 2 | IRAK1_MAP3K7-2P3U(c)    | IRAK1/TIFA/TRAF6 (dimer)/Ubc13/Uev1A/MAP3K7/I P123 complex (2 phosphorylated)                                                             | Cytosol |
| 414 | 2 | IRAK1_MAP3K7-4P3U(c)    | IRAK1/TIFA/TRAF6 (dimer)/Ubc13/Uev1A/MAP3K7/I P123 complex (4 phosphorylated)                                                             | Cytosol |
| 415 | 2 | IRAK1_PLNO3(c)          | IRAK1/Pellino3 complex                                                                                                                    | Cytosol |
| 416 | 2 | IRAK1_TIFA_A20(c)       | IRAK1/TIFA/TRAF6 (dimer)/Ubc13/Uev1A/A20 complex (2 phosphorylated)                                                                       | Cytosol |
| 417 | 2 | IRAK1_TIFA_CYLD(c)      | IRAK1/TIFA/TRAF6 (dimer)/Ubc13/Uev1A/CYLD complex (2 phosphorylated)                                                                      | Cytosol |
| 418 | 2 | IRAK2(c)                | Interleukin-1 receptor associated kinase 2                                                                                                | Cytosol |
| 419 | 2 | IRAK_MYD_TIR(c)         | IRAK1/IRAK4/MyD88 (dimer)/TIR complex                                                                                                     | Cytosol |

|     |   |                         |                                                                                         |         |
|-----|---|-------------------------|-----------------------------------------------------------------------------------------|---------|
| 420 | 2 | IRAK_MYD_TIR-P(c)       | IRAK1/IRAK4/MyD88 (dimer)/TIR complex (phosphorylated)                                  | Cytosol |
| 421 | 2 | IRAK_MYD_TIRAP-2P(c)    | TIR/TIRAP/MyD88(dimer)/IRAK1/IRAK4 complex (diphosphorylated)                           | Cytosol |
| 422 | 2 | IRAK_TOLLIP_TIR(c)      | IRAK4/IRAK1c/MyD88(dimer)/TIR/TOLLIP/TRAF6-D complex                                    | Cytosol |
| 423 | 2 | IRAK_TRAF6(c)           | IRAK1/IRAK4/MyD88 (dimer)/TIR/TRAF6 (dimer)/Ubc13/Uev1A/TIFA complex (2 phosphorylated) | Cytosol |
| 424 | 2 | IRAK_TRAF6_TIRAP(c)     | IRAK1/TIFA/TIR/IRAK4/MyD88(dimer)/TIRAP/TRAF6 (dimer)/Ubc13/Uev1A (2 phosphorylated)    | Cytosol |
| 425 | 2 | IRF3-2PD(c)             | interferon regulatory factor 3 (2 phosphorylated)                                       | Cytosol |
| 426 | 2 | KSR1(c)                 | kinase suppressor of ras 1                                                              | Cytosol |
| 427 | 2 | KSR1-P(c)               | kinase suppressor of ras 1 (phosphorylated)                                             | Cytosol |
| 428 | 2 | KSR1_MAP2K1(c)          | KSR1/MAP2K1 complex                                                                     | Cytosol |
| 429 | 2 | KSR1_RAF1-7P(c)         | KSR1/MAP2K1/Raf-1 complex (7 phosphorylated)                                            | Cytosol |
| 430 | 2 | KSR1_RAF1_MAPK3/1-7P(c) | KSR1/MAP2K1/MAPK3/1/Raf-1 complex (7 phosphorylated)                                    | Cytosol |
| 431 | 2 | KSR1_RAF1_MAPK3/1-9P(c) | KSR1/MAP2K1/MAPK3/1/Raf-1 complex (9 phosphorylated)                                    | Cytosol |
| 432 | 2 | KSR2(c)                 | kinase suppressor of ras 2                                                              | Cytosol |
| 433 | 2 | MAP3K1-PU(c)            | mitogen-activated protein kinase kinase kinase 1 (phosphorylated)                       | Cytosol |
| 434 | 2 | MAP3K5-2P(c)            | mitogen-activated protein kinase kinase kinase 5 (2 phosphorylated)                     | Cytosol |
| 435 | 2 | MAP3K5_TRXRED(c)        | MAP3K5/reduced thioredoxin complex                                                      | Cytosol |
| 436 | 2 | MAP3K7(c)               | mitogen-activated protein kinase kinase kinase 7                                        | Cytosol |
| 437 | 2 | MAP3K7/IP123(c)         | MAP3K7/MAP3K7IP1/MAP3K7IP2/3 complex                                                    | Cytosol |
| 438 | 2 | MAP3K7IP1(c)            | mitogen-activated protein kinase kinase kinase 7 interacting protein 1                  | Cytosol |
| 439 | 2 | MAP3K7IP2/3(c)          | mitogen-activated protein kinase kinase kinase 7 interacting protein 2/3                | Cytosol |
| 440 | 2 | MAP3K7IP_TRAF6-2P2U(c)  | MAP3K7IP23/1/MAP3K7/TRAF6 (dimer)/Ubc13/Uev1A complex (2 phosphorylated)                | Cytosol |
| 441 | 2 | MAP3K8(p52)_NFKB(c)     | mitogen-activated protein kinase kinase kinase 8 (p52)/NFKB (p105) complex              | Cytosol |
| 442 | 2 | MAP3K8(p58)_KSR2(c)     | mitogen-activated protein kinase kinase kinase 8 (p58)/KSR2 complex (phosphorylated)    | Cytosol |

|     |   |                         |                                                                                                 |         |
|-----|---|-------------------------|-------------------------------------------------------------------------------------------------|---------|
| 443 | 2 | MAP3K8_NFKB(c)          | mitogen-activated protein kinase kinase kinase 8 (p52/p58)/NFkB (p105) complex                  | Cytosol |
| 444 | 2 | MAP3K8_NFKB-P(c)        | mitogen-activated protein kinase kinase kinase 8 (p52/p58)/NFkB (p105) complex (phosphorylated) | Cytosol |
| 445 | 2 | MAPK3/1-2PD(c)          | mitogen-activated protein kinase 3/1 (2 phosphorylated)                                         | Cytosol |
| 446 | 2 | MAPK8(c)                | mitogen-activated protein kinase 8                                                              | Cytosol |
| 447 | 2 | MAPK8-2P(c)             | mitogen-activated protein kinase 8 (2 phosphorylated)                                           | Cytosol |
| 448 | 2 | MAPK8-P(c)              | mitogen-activated protein kinase 8 (phosphorylated)                                             | Cytosol |
| 449 | 2 | MAPKAPK2(c)             | mitogen-activated protein kinase activated protein kinase 2                                     | Cytosol |
| 450 | 2 | MD2-D(c)                | MD-2 (dimer)                                                                                    | Cytosol |
| 451 | 2 | MKNK2(c)                | MAP kinase interacting serine/threonine kinase 2                                                | Cytosol |
| 452 | 2 | MKNK2-P(c)              | MAP kinase interacting serine/threonine kinase 2                                                | Cytosol |
| 453 | 2 | MYD88S(c)               | Myeloid differentiation primary response 88 short                                               | Cytosol |
| 454 | 2 | MYD88_IRAK_TOLLIP(c)    | MyD88 (dimer)/TIR/TOLLIP/IRAK1/IRAK 4 complex                                                   | Cytosol |
| 455 | 2 | MYD88_IRAK_TOLLIP-2P(c) | MyD88 (dimer)/TIR/TOLLIP/IRAK1/IRAK 4 (2 phosphorylated)                                        | Cytosol |
| 456 | 2 | MYD88_IRAK_TOLLIP-P(c)  | MyD88 (dimer)/TIR/TOLLIP/IRAK1/IRAK 4 complex (phosphorylated)                                  | Cytosol |
| 457 | 2 | MYD88_MyD88S(c)         | MyD88/MyD88s complex                                                                            | Cytosol |
| 458 | 2 | NFKB(p105)_BTRCP2(c)    | NF-kB(p105)-beta TrCP2 complex                                                                  | Cytosol |
| 459 | 2 | NFKB(p105)_UBCH5A(c)    | NF-kB(p105)-Ubch5A complex                                                                      | Cytosol |
| 460 | 2 | NFKB(p50)_BCL3(c)       | NF-kappa-B (p50 dimer)/Bcl-3 complex (2 phosphorylated)                                         | Cytosol |
| 461 | 2 | NFKB(p50)_IMPA3(c)      | NF-kB(p50)-importin alpha 3 complex                                                             | Cytosol |
| 462 | 2 | NFKB(p50/p105)(c)       | NF-kappa-B (p50/p105) complex                                                                   | Cytosol |
| 463 | 2 | NFKB(p50/p65)-P2(c)     | NF-kappa-B (p50/p65) complex (phosphorylated) 2                                                 | Cytosol |
| 464 | 2 | NFKB(p50/p65)-P4(c)     | NF-kappa-B (p50/p65) complex (phosphorylated) 4                                                 | Cytosol |
| 465 | 2 | NFKB(p65)_SOCS1(c)      | NF-kB (p65)-SOCS1 complex                                                                       | Cytosol |
| 466 | 2 | NFKB_FRAG(c)            | NF-kB processing fragment                                                                       | Cytosol |
| 467 | 2 | NFKB_FRAG2(c)           | NF-kB fragment 2                                                                                | Cytosol |
| 468 | 2 | NFKB_IKBA-5P(c)         | NF-kappa-B (p50/p65)/I-kappa-B-alpha complex (5 phosphorylated)                                 | Cytosol |



|     |   |                       |                                                                                      |         |
|-----|---|-----------------------|--------------------------------------------------------------------------------------|---------|
| 469 | 2 | NFKB_IKBA-5P2A(c)     | NF-kappa-B (p50/p65)/I-kappa-B-alpha complex (5 phosphorylated)                      | Cytosol |
| 470 | 2 | NFKB_IKBA-5P5A(c)     | NF-kappa-B (p50/p65)/I-kappa-B-alpha complex (5 phosphorylated)                      | Cytosol |
| 471 | 2 | NFKB_IKBA_BTRCP2(c)   | NF-kB (p50/p65)/IkbB/beta TrCP2 complex                                              | Cytosol |
| 472 | 2 | NFKB_IKBA_UBCH5(c)    | NFkB/IkBa/UbcH5 complex                                                              | Cytosol |
| 473 | 2 | NFKB_IKBB(c)          | NF-kappa-B (p50/p65)/I-kappa-B-beta complex                                          | Cytosol |
| 474 | 2 | NFKB_IKBB-2P(c)       | NF-kappa-B (p50/p65)/I-kappa-B-beta complex (2 phosphorylated)                       | Cytosol |
| 475 | 2 | NFKB_IKBB-2PU(c)      | NF-kappa-B (p50/p65)/I-kappa-B-beta complex (2 phosphorylated)                       | Cytosol |
| 476 | 2 | NFKB_IKBB-7P(c)       | NF-kappa-B (p50/p65)/I-kappa-B-beta complex (7 phosphorylated)                       | Cytosol |
| 477 | 2 | NFKB_IKBB_BTRCP2(c)   | NFkB/IkBb/betaTrCP2 complex                                                          | Cytosol |
| 478 | 2 | NFKB_PKAC_IKBA(c)     | NF-kappa-B (p50/p65)/protein kinase A (catalytic subunit)/IkbA complex               | Cytosol |
| 479 | 2 | NFKB_PKAC_IKBB(c)     | NF-kappa-B(p50/p65)/PKAc/IkBb complex                                                | Cytosol |
| 480 | 2 | NSF_STXN13(c)         | NSF/Syntaxin 13 complex                                                              | Cytosol |
| 481 | 2 | P22PHOX(c)            | p22-phox protein                                                                     | Cytosol |
| 482 | 2 | P47PHOX-3P(c)         | p47-phox protein (3 phosphorylated)                                                  | Cytosol |
| 483 | 2 | PCASP9_NOD1P(c)       | procaspase 9/nucleotide-binding oligomerization domain protein 1 (activated) complex | Cytosol |
| 484 | 2 | PCASP9_NOD2P(c)       | procaspase 9/nucleotide-binding oligomerization domain protein 2 (activated) complex | Cytosol |
| 485 | 2 | PDK1_pail345p_hs(c)   | phosphoinositide-dependent kinase 1 (activated)                                      | Cytosol |
| 486 | 2 | PI34P5K(c)            | phosphatidylinositol 3                                                               | Cytosol |
| 487 | 2 | PI34P5K-P(c)          | phosphatidylinositol 3                                                               | Cytosol |
| 488 | 2 | PI3K(p150)(c)         | phosphoinositide 3-kinase                                                            | Cytosol |
| 489 | 2 | PI3K(vps34)(c)        | phosphoinositide 3-kinase                                                            | Cytosol |
| 490 | 2 | PI3K3(c)              | phosphoinositide 3-kinase                                                            | Cytosol |
| 491 | 2 | PI3K3_RAB5(c)         | phosphoinositide 3-kinase/Rab5/GTP complex                                           | Cytosol |
| 492 | 2 | PI3K3_RAB5_pail_hs(c) | PI3K3/Rab5/GTP/phosphatidylinositol complex                                          | Cytosol |
| 493 | 2 | PI3P4K(c)             | phosphatidylinositol 3-phosphate 4-kinase                                            | Cytosol |
| 494 | 2 | PI3P4K-P(c)           | phosphatidylinositol 3-phosphate 4-kinase (phosphorylated)                           | Cytosol |
| 495 | 2 | PI4P5K(c)             | phosphatidylinositol-4-phosphate 5-kinase                                            | Cytosol |

|     |   |                        |                                                                                               |         |
|-----|---|------------------------|-----------------------------------------------------------------------------------------------|---------|
| 496 | 2 | PI4P5K-P(c)            | phosphatidylinositol-4-phosphate 5-kinase (phosphorylated)                                    | Cytosol |
| 497 | 2 | PKA(c)                 | protein kinase A                                                                              | Cytosol |
| 498 | 2 | PKA-2P(c)              | protein kinase A (2 phosphorylated)                                                           | Cytosol |
| 499 | 2 | PKCA-P(c)              | protein kinase C                                                                              | Cytosol |
| 500 | 2 | PKCA_ca2(c)            | PKCalpha/calcium ion complex                                                                  | Cytosol |
| 501 | 2 | PKCA_dag_ps_hs(c)      | PKCalpha/diacylglycerol/phosphatidylserine complex                                            | Cytosol |
| 502 | 2 | PKCB2-P(c)             | protein kinase C                                                                              | Cytosol |
| 503 | 2 | PKCB2_ca2(c)           | PKCbeta2/calcium ion complex                                                                  | Cytosol |
| 504 | 2 | PKCB2_dag_ps_hs(c)     | PKCbeta2/diacylglycerol/phosphatidylserine complex                                            | Cytosol |
| 505 | 2 | PKCD(c)                | protein kinase C (delta isoform)                                                              | Cytosol |
| 506 | 2 | PKCD-2P(c)             | protein kinase C (delta isoform) (2 phosphorylated)                                           | Cytosol |
| 507 | 2 | PKCD-P(c)              | protein kinase C (delta isoform) (phosphorylated)                                             | Cytosol |
| 508 | 2 | PKCD_dag_ps_hs-2P(c)   | protein kinase C/diacylglycerol/phosphatidylserine complex (delta isoform) (2 phosphorylated) | Cytosol |
| 509 | 2 | PKCZ_pa_hs(c)          | PKCzeta/phosphatidic acid complex                                                             | Cytosol |
| 510 | 2 | PKCZ_ps_hs(c)          | PKCzeta/phosphatidylserine complex                                                            | Cytosol |
| 511 | 2 | PKR_TRAF6-2PD(c)       | PKR (dimer)/TRAF6 (dimer) complex (4 phosphorylated)                                          | Cytosol |
| 512 | 2 | PLCB2(c)               | phospholipase C                                                                               | Cytosol |
| 513 | 2 | PLCB2P(c)              | phospholipase C                                                                               | Cytosol |
| 514 | 2 | PLCG(c)                | phospholipase C                                                                               | Cytosol |
| 515 | 2 | PLCG-P(c)              | phospholipase C                                                                               | Cytosol |
| 516 | 2 | PLD(c)                 | phospholipase D1                                                                              | Cytosol |
| 517 | 2 | PLDP(c)                | phospholipase D1                                                                              | Cytosol |
| 518 | 2 | PLNO1_IRAK4(c)         | pellino1/TIR/MyD88(dimer)/IRAK4 complex                                                       | Cytosol |
| 519 | 2 | PLNO1_IRAK4_TIRAP(c)   | pellino1/TIR/TIRAP/MyD88 (dimer)/IRAK4 complex                                                | Cytosol |
| 520 | 2 | PLNO3(c)               | Pellino 3                                                                                     | Cytosol |
| 521 | 2 | PP2C_B1(c)             | protein phosphatase 2C                                                                        | Cytosol |
| 522 | 2 | PP2C_B1-P(c)           | protein phosphatase 2C                                                                        | Cytosol |
| 523 | 2 | PP2C_E(c)              | protein phosphatase 2C                                                                        | Cytosol |
| 524 | 2 | PP2C_E-P(c)            | protein phosphatase 2C                                                                        | Cytosol |
| 525 | 2 | PPAP(c)                | phosphatidic acid phosphatase (generic)                                                       | Cytosol |
| 526 | 2 | PPAP-P(c)              | phosphatidic acid phosphatase (generic) (phosphorylated)                                      | Cytosol |
| 527 | 2 | PRE_IL1A_CALPN_3ca2(c) | pre IL-1a/calpain/calcium ion complex                                                         | Cytosol |
| 528 | 2 | PRE_IL1B(c)            | pre interleukin 1 beta                                                                        | Cytosol |

|     |   |                        |                                                                                                   |         |
|-----|---|------------------------|---------------------------------------------------------------------------------------------------|---------|
| 529 | 2 | PRE_IL1B_CASP1(c)      | pre IL1beta/caspase 1 complex                                                                     | Cytosol |
| 530 | 2 | RAB5_RBPTIN5_RBX5(c)   | Rab5/Rabaptin5/Rabex5 complex                                                                     | Cytosol |
| 531 | 2 | RAC1_VAV1(c)           | Rac1/Vav1 complex                                                                                 | Cytosol |
| 532 | 2 | RAS_GTP_RAF1(c)        | Ras/GTP/Raf-1 complex                                                                             | Cytosol |
| 533 | 2 | RAS_GTP_RIN1(c)        | Ras family small GTP-binding protein (generic)/gtp/Ras and Rab interactor 1 complex               | Cytosol |
| 534 | 2 | RBPTIN5(c)             | Rab family small GTP-binding effector protein 1                                                   | Cytosol |
| 535 | 2 | RBPTIN5_RBX5(c)        | Rab family small GTP-binding effector protein 1/Rab5 guanine nucleotide exchange factor 1 complex | Cytosol |
| 536 | 2 | RBX5(c)                | Rab5 guanine nucleotide exchange factor 1                                                         | Cytosol |
| 537 | 2 | RHOA_GDP(c)            | Rho family small GTP-binding protein RhoA/gdp complex                                             | Cytosol |
| 538 | 2 | RHOA_GTP(c)            | Rho family small GTP-binding protein RhoA/gtp complex                                             | Cytosol |
| 539 | 2 | RIN1(c)                | Ras and Rab interactor 1                                                                          | Cytosol |
| 540 | 2 | RIP1_TICAM1P(c)        | RIP1/TRAF6 (dimer)/TICAM1P complex                                                                | Cytosol |
| 541 | 2 | RIP2_NOD1P(c)          | RIP2/NOD1P complex                                                                                | Cytosol |
| 542 | 2 | RIP2_NOD2P(c)          | RIP2/NOD2P complex                                                                                | Cytosol |
| 543 | 2 | RIP2_TRIP6_NOD1P(c)    | RIP2/TRIP6/NOD1P complex                                                                          | Cytosol |
| 544 | 2 | RIP2_TRIP6_TRAF2(c)    | RIP2/TRIP6/TRAF2 complex                                                                          | Cytosol |
| 545 | 2 | RKIP_MAP3K14(c)        | RKIP/MAP3K14 (NIK) complex                                                                        | Cytosol |
| 546 | 2 | RKIP_MAP3K7IP_TRAF6(c) | RKIP/MAP3K7/IP/Ubc13/Uev1A/TRAF6 (dimer) complex                                                  | Cytosol |
| 547 | 2 | SCD14(c)               | soluble CD14                                                                                      | Cytosol |
| 548 | 2 | SGK(c)                 | serum/glucocorticoid regulated kinase                                                             | Cytosol |
| 549 | 2 | SGK-P(c)               | serum/glucocorticoid regulated kinase (phosphorylated)                                            | Cytosol |
| 550 | 2 | SH3BP5(c)              | SH3-domain binding protein 5 (BTK-associated)                                                     | Cytosol |
| 551 | 2 | SIGIRR-D(c)            | single immunoglobulin IL-1R-related molecule (dimer)                                              | Cytosol |
| 552 | 2 | SOCS1(c)               | suppressor of cytokine signaling 1                                                                | Cytosol |
| 553 | 2 | SQSTM1(c)              | sequestosome 1                                                                                    | Cytosol |
| 554 | 2 | SQSTM1_PKCZ(c)         | sequestosome 1/protein kinase C (zeta isoform) complex                                            | Cytosol |
| 555 | 2 | SRTK(c)                | Src-related tyrosine kinase                                                                       | Cytosol |
| 556 | 2 | SRTK-P(c)              | Src-related tyrosine kinase (phosphorylated)                                                      | Cytosol |
| 557 | 2 | ST2L(c)                | ST2L                                                                                              | Cytosol |
| 558 | 2 | ST2L_TIRAP(c)          | ST2L/TIRAP/MyD88(dimer) complex                                                                   | Cytosol |
| 559 | 2 | STLR2/L_SCD14(c)       | soluble TLR2/ligand/soluble CD14 complex                                                          | Cytosol |
| 560 | 2 | STLR2_CD14(c)          | soluble TLR2/CD14 complex                                                                         | Cytosol |

|     |   |                        |                                                                       |         |
|-----|---|------------------------|-----------------------------------------------------------------------|---------|
| 561 | 2 | STLR4(c)               | soluble TLR4                                                          | Cytosol |
| 562 | 2 | STLR4/L_MD2(c)         | soluble TLR4/ligand/MD-2 complex                                      | Cytosol |
| 563 | 2 | STLR4_MD2(c)           | MD-2/sTLR4 complex                                                    | Cytosol |
| 564 | 2 | TICAM1P_IKKE(c)        | TICAM1P/IKKe complex                                                  | Cytosol |
| 565 | 2 | TICAM1P_TBK1(c)        | TICAM1P/TBK1 complex                                                  | Cytosol |
| 566 | 2 | TICAM2(c)              | toll-like receptor adaptor molecule 2                                 | Cytosol |
| 567 | 2 | TICAM2_TLR4/L_MD2(c)   | TICAM2/TLR4/L/MD2 complex                                             | Cytosol |
| 568 | 2 | TIR_MYD_FADD(c)        | TIR/MyD88 (dimer)/FADD complex                                        | Cytosol |
| 569 | 2 | TIR_MYD_TOLLIP(c)      | TIR/TIRAP/MyD88(dimer)/IRAK1 C/IRAK4/TOLLIP complex                   | Cytosol |
| 570 | 2 | TIR_TIRAP_IRAK2(c)     | TIR/TIRAP/MyD88(dimer)/IRAK4 /IRAK2 complex                           | Cytosol |
| 571 | 2 | TIR_TIRAP_MYD_FADD(c)  | TIR/TIRAP/MyD88 (dimer)/FADD complex                                  | Cytosol |
| 572 | 2 | TIR_TIRAP_TOLLIP(c)    | TIR/TIRAP/MyD88(dimer)/IRAK1 /IRAK4/TOLLIP complex                    | Cytosol |
| 573 | 2 | TIR_TIRAP_TOLLIP-2P(c) | TIR/TIRAP/MyD88(dimer)/IRAK1 /IRAK4/TOLLIP complex (diphosphorylated) | Cytosol |
| 574 | 2 | TIR_TIRAP_TOLLIP-P(c)  | TIR/TIRAP/MyD88(dimer)/IRAK1 /IRAK4/TOLLIP complex (phosphorylated)   | Cytosol |
| 575 | 2 | TLR1/10/L(c)           | Toll-like receptor 1/10 ligand complex                                | Cytosol |
| 576 | 2 | TLR1/2/L(c)            | Toll-like receptor 1/2 ligand complex                                 | Cytosol |
| 577 | 2 | TLR10/L-D(c)           | Toll-like receptor 10 (dimer) ligand complex                          | Cytosol |
| 578 | 2 | TLR11(c)               | Toll-like receptor 11                                                 | Cytosol |
| 579 | 2 | TLR11/L-D(c)           | Toll-like receptor 11 (dimer) ligand complex                          | Cytosol |
| 580 | 2 | TLR2/10/L(c)           | Toll-like receptor 2/10 ligand complex                                | Cytosol |
| 581 | 2 | TLR2/6/L(c)            | Toll-like receptor 2/6 ligand complex                                 | Cytosol |
| 582 | 2 | TLR2/L-2PD(c)          | Toll-like receptor 2 (dimer) ligand/CD14 complex (4 phosphorylated)   | Cytosol |
| 583 | 2 | TLR4/L_MD2_TRD3A(c)    | Toll-like receptor 4 (dimer) ligand/MD-2/CD14/LBP/TRIAD3A complex     | Cytosol |
| 584 | 2 | TLR4_MD2(c)            | Toll-like receptor 4/MD-2 complex                                     | Cytosol |
| 585 | 2 | TLR4_SIGIRR(c)         | Toll-like receptor 4/SIGIRR complex                                   | Cytosol |
| 586 | 2 | TLR4_SIGIRR_TRAF6(c)   | TLR4/SIGIRR/TRAF6 (dimer) complex                                     | Cytosol |
| 587 | 2 | TLR5/L-D(c)            | Toll-like receptor 5 (dimer) ligand complex                           | Cytosol |
| 588 | 2 | TLR5_SIGIRR(c)         | TLR5/SIGIRR complex                                                   | Cytosol |
| 589 | 2 | TLR5_SIGIRR_TRAF6(c)   | TLR5/SIGIRR/TRAF6 (dimer) complex                                     | Cytosol |

|     |   |                       |                                                              |         |
|-----|---|-----------------------|--------------------------------------------------------------|---------|
| 590 | 2 | TLR6(c)               | Toll-like receptor 6                                         | Cytosol |
| 591 | 2 | TLR9/L_TRD3A(c)       | TLR9/L/TRIAD3A complex                                       | Cytosol |
| 592 | 2 | TLR9_SIGIRR(c)        | TLR9/SIGIRR complex                                          | Cytosol |
| 593 | 2 | TLR9_SIGIRR_TRAF6(c)  | TLR9/SIGIRR/TRAF6 (dimer) complex                            | Cytosol |
| 594 | 2 | TLRL1/10(c)           | Toll-like receptor 1/10 ligand (generic)                     | Cytosol |
| 595 | 2 | TLRL1/2(c)            | Toll-like receptor 1/2 ligand (generic)                      | Cytosol |
| 596 | 2 | TLRL10(c)             | Toll-like receptor 10 ligand (generic)                       | Cytosol |
| 597 | 2 | TLRL11(c)             | Toll-like receptor 11 ligand (generic)                       | Cytosol |
| 598 | 2 | TLRL2/10(c)           | Toll-like receptor 2/10 ligand (generic)                     | Cytosol |
| 599 | 2 | TLRL2/6(c)            | Toll-like receptor 2/6 ligand (generic)                      | Cytosol |
| 600 | 2 | TLRL5(c)              | Toll-like receptor 5 ligand (generic)                        | Cytosol |
| 601 | 2 | TOLLIP-PU(c)          | Toll interacting protein (phosphorylated)                    | Cytosol |
| 602 | 2 | TOLLIP_pail345p_hs(c) | Toll interacting protein/phosphatidylinositol 3              | Cytosol |
| 603 | 2 | TOLLIP_pail3p_hs(c)   | Toll-interacting protein/phosphatidylinositol 3-phosphate    | Cytosol |
| 604 | 2 | TRAF2(c)              | tumor necrosis factor (TNF) receptor-associated factor 2     | Cytosol |
| 605 | 2 | TRAF6_SIGIRR(c)       | TRAF6 (dimer)/SIGIRR (dimer) complex                         | Cytosol |
| 606 | 2 | TRXRD(c)              | Thioredoxin reductase                                        | Cytosol |
| 607 | 2 | TRX_NADPH(c)          | oxidized thioredoxin/thioredoxin reductase/NADPH complex     | Cytosol |
| 608 | 2 | UBCH5(c)              | ubiquitin-conjugating enzyme E2D (Ubc 4/5 homolog) (generic) | Cytosol |
| 609 | 2 | UBCH5A(c)             | ubiquitin-conjugating enzyme E2D 1 (Ubc4/5 homolog)          | Cytosol |
| 610 | 2 | accoa(c)              | Acetyl-CoA                                                   | Cytosol |
| 611 | 2 | chol(c)               | Choline                                                      | Cytosol |
| 612 | 2 | coa(c)                | Coenzyme A                                                   | Cytosol |
| 613 | 2 | nadp(c)               | Nicotinamide adenine dinucleotide phosphate                  | Cytosol |
| 614 | 2 | nadph(c)              | Nicotinamide adenine dinucleotide phosphate - reduced        | Cytosol |
| 615 | 2 | pail34p_hs(c)         | phosphatidylinositol-3                                       | Cytosol |
| 616 | 2 | pail45p_hs_PLCB2(c)   | PI(4                                                         | Cytosol |
| 617 | 2 | pail45p_hs_PLCG(c)    | PI(4                                                         | Cytosol |
| 618 | 2 | pail4p_hs(c)          | 1-Phosphatidyl-1D-myo-inositol 4-phosphate (Homo sapiens)    | Cytosol |
| 619 | 2 | pail_hs(c)            | phosphatidylinositol (homo sapiens)                          | Cytosol |

|     |   |                  |                                                         |                |
|-----|---|------------------|---------------------------------------------------------|----------------|
| 620 | 2 | pchol_hs(c)      | Phosphatidylcholine (homo sapiens)                      | Cytosol        |
| 621 | 2 | pchol_hs_PLDP(c) | phosphatidylcholine-phospholipase D (activated) complex | Cytosol        |
| 622 | 2 | ALPS(e)          | Atypical lipopolysaccharide                             | Extra-organism |
| 623 | 2 | BDFN2(e)         | beta defensin 2                                         | Extra-organism |
| 624 | 2 | BPM(e)           | Bropirimine                                             | Extra-organism |
| 625 | 2 | CPGCIGC(e)       | CpG chromatin IgG2a complexes                           | Extra-organism |
| 626 | 2 | CSGA(e)          | CsgA                                                    | Extra-organism |
| 627 | 2 | DCLDLPP(e)       | Diacetylated lipopeptides                               | Extra-organism |
| 628 | 2 | DCLLPP(e)        | Diacyl lipopeptides                                     | Extra-organism |
| 629 | 2 | ENVP(e)          | Envelope protein                                        | Extra-organism |
| 630 | 2 | FBNG(e)          | Fibrinogen                                              | Extra-organism |
| 631 | 2 | FLGN(e)          | Flagellin                                               | Extra-organism |
| 632 | 2 | FUSP(e)          | Fusion protein                                          | Extra-organism |
| 633 | 2 | GCSPL(e)         | Glycoinositol phospholipids                             | Extra-organism |
| 634 | 2 | GLC(e)           | Glycolipids                                             | Extra-organism |
| 635 | 2 | HSP60(e)         | Heat shock protein 60                                   | Extra-organism |
| 636 | 2 | IL1A(e)          | interleukin 1 alpha                                     | Extra-organism |
| 637 | 2 | IL1B(e)          | interleukin 1 beta                                      | Extra-organism |
| 638 | 2 | LAM(e)           | Lipoarabinomannan                                       | Extra-organism |
| 639 | 2 | LP(e)            | Lipoprotein                                             | Extra-organism |
| 640 | 2 | LPPS(e)          | Lipopeptides                                            | Extra-organism |
| 641 | 2 | LXR(e)           | Loxoribine                                              | Extra-organism |
| 642 | 2 | MRDP(e)          | muramyl dipeptide                                       | Extra-organism |
| 643 | 2 | MRNA(e)          | mRNA (generic)                                          | Extra-organism |
| 644 | 2 | OLSCHYA(e)       | Oligosaccharides of hyaluronic acid                     | Extra-organism |
| 645 | 2 | OMPA(e)          | Outer membrane protein A                                | Extra-organism |
| 646 | 2 | OSPALP(e)        | Outer surface protein A lipoprotein                     | Extra-organism |
| 647 | 2 | PLP(e)           | Profilin-like protein                                   | Extra-organism |
| 648 | 2 | PRE_IL1A(e)      | pre interleukin 1 alpha                                 | Extra-organism |
| 649 | 2 | PRNS(e)          | Porins                                                  | Extra-organism |
| 650 | 2 | PSCHPS(e)        | Polysaccharide fragment of heparan sulphate             | Extra-organism |
| 651 | 2 | PTG_HS(e)        | Peptidoglycan (Homo sapiens)                            | Extra-organism |
| 652 | 2 | SF(e)            | Soluble factors                                         | Extra-organism |
| 653 | 2 | STF(e)           | Small molecule transcription factors                    | Extra-organism |
| 654 | 2 | T3RFBN(e)        | Type III repeat extra domain A of fibronectin           | Extra-organism |
| 655 | 2 | TCLDLPP(e)       | Triacetylated lipopeptides                              | Extra-organism |
| 656 | 2 | TLRL1/10(e)      | Toll-like receptor 1/10 ligand (generic)                | Extra-organism |
| 657 | 2 | TLRL10(e)        | Toll-like receptor 10 ligand (generic)                  | Extra-organism |
| 658 | 2 | TLRL2/10(e)      | Toll-like receptor 2/10 ligand (generic)                | Extra-organism |
| 659 | 2 | TLRL5(e)         | Toll-like receptor 5 ligand (generic)                   | Extra-organism |

|     |   |                |                                                                |                |
|-----|---|----------------|----------------------------------------------------------------|----------------|
| 660 | 2 | TXL(e)         | Taxol                                                          | Extra-organism |
| 661 | 2 | UBIQ(e)        | Ubiquitin                                                      | Extra-organism |
| 662 | 2 | UMLCPGD(e)     | Unmethylated CpG DNA                                           | Extra-organism |
| 663 | 2 | UNKN(e)        | Unknown TLR11 ligand                                           | Extra-organism |
| 664 | 2 | accoa(e)       | Acetyl-CoA                                                     | Extra-organism |
| 665 | 2 | adp(e)         | ADP                                                            | Extra-organism |
| 666 | 2 | atp(e)         | ATP                                                            | Extra-organism |
| 667 | 2 | ca2(e)         | Calcium                                                        | Extra-organism |
| 668 | 2 | chol(e)        | Choline                                                        | Extra-organism |
| 669 | 2 | coa(e)         | Coenzyme A                                                     | Extra-organism |
| 670 | 2 | dag_hs(e)      | diacylglycerol (homo sapiens)                                  | Extra-organism |
| 671 | 2 | gdp(e)         | GDP                                                            | Extra-organism |
| 672 | 2 | gtp(e)         | GTP                                                            | Extra-organism |
| 673 | 2 | h2o(e)         | H2O                                                            | Extra-organism |
| 674 | 2 | h2o2(e)        | Hydrogen peroxide                                              | Extra-organism |
| 675 | 2 | mi145p(e)      | 1D-myo-Inositol 1                                              | Extra-organism |
| 676 | 2 | nadp(e)        | Nicotinamide adenine dinucleotide phosphate                    | Extra-organism |
| 677 | 2 | nadph(e)       | Nicotinamide adenine dinucleotide phosphate - reduced          | Extra-organism |
| 678 | 2 | pa_hs(e)       | phosphatidic acid (homo sapiens)                               | Extra-organism |
| 679 | 2 | pail345p_hs(e) | phosphatidylinositol-3                                         | Extra-organism |
| 680 | 2 | pail4p_hs(e)   | 1-Phosphatidyl-1D-myo-inositol 4-phosphate (Homo sapiens)      | Extra-organism |
| 681 | 2 | pail_hs(e)     | phosphatidylinositol (homo sapiens)                            | Extra-organism |
| 682 | 2 | pchol_hs(e)    | Phosphatidylcholine (homo sapiens)                             | Extra-organism |
| 683 | 2 | pi(e)          | Phosphate                                                      | Extra-organism |
| 684 | 2 | ps_hs(e)       | phosphatidylserine (homo sapiens)                              | Extra-organism |
| 685 | 2 | TLR3/L-2PD(l)  | Toll-like receptor 3 (dimer) ligand complex (4 phosphorylated) | Lysosome       |
| 686 | 2 | adp(l)         | ADP                                                            | Lysosome       |
| 687 | 2 | atp(l)         | ATP                                                            | Lysosome       |
| 688 | 2 | h(l)           | H+                                                             | Lysosome       |
| 689 | 2 | A1909_DEGR(n)  | A1909 (degraded)                                               | Nucleus        |
| 690 | 2 | A1910_DEGR(n)  | A1910 (degraded)                                               | Nucleus        |
| 691 | 2 | A2170_DEGR(n)  | A2170 (degraded)                                               | Nucleus        |
| 692 | 2 | AKT-2P(n)      | Akt (2 phosphorylated)                                         | Nucleus        |
| 693 | 2 | AP1_FOS_JUN(n) | AP-1/c-Fos/c-Jun complex (8 phosphorylated)                    | Nucleus        |
| 694 | 2 | AP1_JUN(n)     | AP-1/c-Jun (dimer) complex (4 phosphorylated)                  | Nucleus        |
| 695 | 2 | BCL3(n)        | B-cell CLL/lymphoma 3                                          | Nucleus        |
| 696 | 2 | BTRCP1(n)      | beta-transducin repeat containing protein 1                    | Nucleus        |
| 697 | 2 | CREB(n)        | cAMP responsive element binding protein                        | Nucleus        |
| 698 | 2 | CREB-2PD(n)    | cAMP responsive element binding protein (2 phosphorylated)     | Nucleus        |
| 699 | 2 | CREB-D(n)      | cAMP responsive element binding protein (dimer)                | Nucleus        |

|     |   |                           |                                                                  |         |
|-----|---|---------------------------|------------------------------------------------------------------|---------|
| 700 | 2 | ELK1_SRE(n)               | ELK1 (2 phosphorylated)/SRE gene complex                         | Nucleus |
| 701 | 2 | FOS_JUN(n)                | c-Fos/c-Jun complex (8 phosphorylated)                           | Nucleus |
| 702 | 2 | GSK3B(n)                  | glycogen synthase kinase 3 beta                                  | Nucleus |
| 703 | 2 | GSK3B-P(n)                | glycogen synthase kinase 3 beta (phosphorylated)                 | Nucleus |
| 704 | 2 | HDAC1(n)                  | histone deacetylase 1 (inactive)                                 | Nucleus |
| 705 | 2 | HH3(n)                    | histone H3                                                       | Nucleus |
| 706 | 2 | HH3-P(n)                  | histone H3 (phosphorylated)                                      | Nucleus |
| 707 | 2 | HMG14(n)                  | high-mobility group nucleosome binding domain 1                  | Nucleus |
| 708 | 2 | HMG14-P(n)                | high-mobility group nucleosome binding domain 1 (phosphorylated) | Nucleus |
| 709 | 2 | HNRNPA1(n)                | heterogeneous nuclear ribonucleoprotein A1                       | Nucleus |
| 710 | 2 | HNRNPA1-3P(n)             | heterogeneous nuclear ribonucleoprotein A1 (3 phosphorylated)    | Nucleus |
| 711 | 2 | IKBB-2P(n)                | I-kappa-B-beta (2 phosphorylated)                                | Nucleus |
| 712 | 2 | IKBZ(n)                   | I-kappa-B-zeta (protein)                                         | Nucleus |
| 713 | 2 | IMPA3(n)                  | importin alpha 3                                                 | Nucleus |
| 714 | 2 | IRF3-2PD(n)               | interferon regulatory factor 3 (2 phosphorylated)                | Nucleus |
| 715 | 2 | IRF7-2P(n)                | interferon regulatory factor 7 (2 phosphorylated)                | Nucleus |
| 716 | 2 | ISRE_IRF3(n)              | ISRE/IRF3 complex (2 phosphorylated)                             | Nucleus |
| 717 | 2 | ISRE_IRF7(n)              | ISRE/IRF7 complex (2 phosphorylated)                             | Nucleus |
| 718 | 2 | JUN-2PD(n)                | c-Jun (2 phosphorylated)                                         | Nucleus |
| 719 | 2 | MAPK11_MAPKAPK2(n)        | MAPK11/MAPKAPK2 complex                                          | Nucleus |
| 720 | 2 | MAPK14_MAPKAPK2(n)        | MAPK14/MAPKAPK2 complex                                          | Nucleus |
| 721 | 2 | MKP(n)                    | MAP kinase phosphatase                                           | Nucleus |
| 722 | 2 | MKP-P(n)                  | MAP kinase phosphatase (phosphorylated)                          | Nucleus |
| 723 | 2 | MYC(n)                    | c-Myc                                                            | Nucleus |
| 724 | 2 | MYC-2P(n)                 | c-Myc (2 phosphorylated)                                         | Nucleus |
| 725 | 2 | NFKB(p50)_IKBZ(n)         | NF-kappa-B (p50 dimer)/I-kappa-B-zeta complex (2 phosphorylated) | Nucleus |
| 726 | 2 | NFKB(p50)_IMPA3(n)        | NF-kB(p50)-importin alpha 3 complex                              | Nucleus |
| 727 | 2 | NFKB(p50)_KB_SITE(n)      | NF-kappa-B (p50 dimer)/kB site/HDAC1 complex                     | Nucleus |
| 728 | 2 | NFKB(p50/p65)-5P2A(n)     | NF-kappa-B (p50/p65) complex (5 phosphorylated)                  | Nucleus |
| 729 | 2 | NFKB(p50/p65)_CBP-5P3A(n) | NF-kappa-B (p50/p65)/CBP complex (5 phosphorylated)              | Nucleus |
| 730 | 2 | NFKB(p65)-5P3A(n)         | NF-kappa-B (p65) (5 phosphorylated)                              | Nucleus |



|     |   |                     |                                                                 |                       |
|-----|---|---------------------|-----------------------------------------------------------------|-----------------------|
| 731 | 2 | NFKB(p65)-5P3AU(n)  | NF-kappa-B (p65) (5phosphorylated)                              | Nucleus               |
| 732 | 2 | NFKB_IKBA-5P(n)     | NF-kappa-B (p50/p65)/I-kappa-B-alpha complex (5 phosphorylated) | Nucleus               |
| 733 | 2 | NFKB_IKBA-5P2A(n)   | NF-kappa-B (p50/p65)/I-kappa-B-alpha complex (5 phosphorylated) | Nucleus               |
| 734 | 2 | NFKB_IKBA-5P5A(n)   | NF-kappa-B (p50/p65)/I-kappa-B-alpha complex (5 phosphorylated) | Nucleus               |
| 735 | 2 | NFKB_IKBA_BTRCP1(n) | NFkB/IkBa/betaTrCP1 complex                                     | Nucleus               |
| 736 | 2 | NFKB_IKBA_UBCH5(n)  | NFkB/IkBa/UbcH5 complex                                         | Nucleus               |
| 737 | 2 | NFKB_IKBB-7P(n)     | NF-kappa-B (p50/p65)/I-kappa-B-beta complex (7 phosphorylated)  | Nucleus               |
| 738 | 2 | PKCZ(n)             | protein kinase C (zeta isoform)                                 | Nucleus               |
| 739 | 2 | PKCZ-P(n)           | protein kinase C (zeta isoform) (phosphorylated)                | Nucleus               |
| 740 | 2 | PP2B(n)             | protein phosphatase 2B                                          | Nucleus               |
| 741 | 2 | PP2B-P(n)           | protein phosphatase 2B (phosphorylated)                         | Nucleus               |
| 742 | 2 | SRE_GENE(n)         | c-Fos serum response element (gene)                             | Nucleus               |
| 743 | 2 | UBCH5(n)            | ubiquitin-conjugating enzyme E2D (Ubc 4/5 homolog) (generic)    | Nucleus               |
| 744 | 2 | ac(n)               | Acetate                                                         | Nucleus               |
| 745 | 2 | IP3R(r)             | inositol 1                                                      | Endoplasmic Reticulum |
| 746 | 2 | IP3R_mi145p(r)      | inositol 1                                                      | Endoplasmic Reticulum |
| 747 | 2 | SERCA(r)            | sarco/endoplasmic reticulum Ca(2+)-ATPase                       | Endoplasmic Reticulum |
| 748 | 2 | SERCA-P(r)          | sarco/endoplasmic reticulum Ca(2+)-ATPase (phosphorylated)      | Endoplasmic Reticulum |
| 749 | 2 | EEA1_pai3p_hs(v)    | EEA1(dimer)/PI3P complex                                        | Vacuole               |
| 750 | 2 | PHOX_GTP-3P(v)      | gp91/p22/p40/p47 (3 phosphorylated)/p67PHOX/Rac1 /GTP complex   | Vacuole               |
| 751 | 2 | PHOX_GTP-8P(v)      | gp91/p22/p40/p47 (8 phosphorylated)/p67PHOX/Rac1 /GTP complex   | Vacuole               |
| 752 | 2 | TLRL9(v)            | Toll-like receptor 9 ligand (generic)                           | Vacuole               |
