# Supplementary material for: Identification of Potential Pathway Mediation Targets in Toll-like Receptor Signaling
Source: PubMed Central journal article supplement (PMC2634968; doi:10.1371/journal.pcbi.1000292), 2009-02-20
Supplement: pcbi.1000292.s004.pdf [file pcbi.1000292.s004.pdf]

**Table S2: TLR network reactions**

| <b>ABBREVIATION</b>     | <b>OFFICIAL NAME</b>                                                                                                                            | <b>DIRECTION</b> |
|-------------------------|-------------------------------------------------------------------------------------------------------------------------------------------------|------------------|
| DM_A001_DEGR(c)         | A001 degraded demand                                                                                                                            | Irreversible     |
| DM_A1115_DEGR(c)        | A1115 (degraded) demand                                                                                                                         | Irreversible     |
| DM_A1146_DEGR(c)        | A1146 (degraded) demand                                                                                                                         | Irreversible     |
| DM_A1159_DEGR(c)        | A1159 (degraded) demand                                                                                                                         | Irreversible     |
| DM_A153_DEGR(c)         | A153 (degraded) demand                                                                                                                          | Irreversible     |
| DM_A1901_DEGR(c)        | A1901 (degraded) demand                                                                                                                         | Irreversible     |
| DM_A1901_DEGR2(c)       | A1901 degraded 2 demand                                                                                                                         | Irreversible     |
| DM_A1909_DEGR(n)        | A1909 (degraded) demand                                                                                                                         | Irreversible     |
| DM_A1910_DEGR(n)        | A1910 (degraded) demand                                                                                                                         | Irreversible     |
| DM_A2069_DEGR(c)        | A2069 (degraded) demand                                                                                                                         | Irreversible     |
| DM_A2129_DEGR(c)        | A2129 (degraded) demand                                                                                                                         | Irreversible     |
| DM_A2156_DEGR(c)        | A2156 (degraded) demand                                                                                                                         | Irreversible     |
| DM_A2170_DEGR(n)        | A2170 (degraded) demand                                                                                                                         | Irreversible     |
| DM_A2382_DEGR(c)        | A2382 (degraded) demand                                                                                                                         | Irreversible     |
| DM_A385_DEGR(c)         | A385 (degraded) demand                                                                                                                          | Irreversible     |
| DM_A399_DEGR(c)         | A399 (degraded) demand                                                                                                                          | Irreversible     |
| DM_A399_DEGR2(c)        | A399 (degraded) (unphosphorylated) demand                                                                                                       | Irreversible     |
| DM_A454_DEGR(c)         | A454 (degraded) demand                                                                                                                          | Irreversible     |
| DM_A523_DEGR(c)         | A523 (degraded) demand                                                                                                                          | Irreversible     |
| DM_A796_DEGR(c)         | A796 (degraded) demand                                                                                                                          | Irreversible     |
| DM_A839_DEGR(c)         | A839 (degraded) demand                                                                                                                          | Irreversible     |
| DM_ABIN_A20(c)          | ABIN/A20 complex demand                                                                                                                         | Irreversible     |
| DM_AKT-2P(n)            | Akt (2 phosphorylated) demand                                                                                                                   | Irreversible     |
| DM_AP1_FOS_JUN(n)       | AP-1/c-Fos/c-Jun complex (8 phosphorylated) demand                                                                                              | Irreversible     |
| DM_AP1_JUN(n)           | AP-1/c-Jun (dimer) complex (4 phosphorylated) demand                                                                                            | Irreversible     |
| DM_ATF2-P(n)            | Activating transcription factor 2 (phosphorylated) demand                                                                                       | Irreversible     |
| DM_BTK_IBTK(c)          | BTK/iBTK complex demand                                                                                                                         | Irreversible     |
| DM_BTK_SH3BP5(c)        | BTK/SH3BP5 complex demand                                                                                                                       | Irreversible     |
| DM_CASP8(c)             | caspase 8 demand                                                                                                                                | Irreversible     |
| DM_CASP9(c)             | caspase 9 demand                                                                                                                                | Irreversible     |
| DM_CREB-2PD(n)          | cAMP responsive element binding protein (2 phosphorylated, dimer) demand                                                                        | Irreversible     |
| DM_CREB_CRE-2P(n)       | CREB/CRE site complex (2 phosphorylated) demand                                                                                                 | Irreversible     |
| DM_DSRNA(c)             | Double stranded RNA demand                                                                                                                      | Irreversible     |
| DM_EIF2A-P(c)           | eukaryotic translation initiation factor 2 (phosphorylated) demand                                                                              | Irreversible     |
| DM_EIF4E-P(c)           | eukaryotic translation initiation factor 4E (phosphorylated) demand                                                                             | Irreversible     |
| DM_ELK1_SRE(n)          | ELK1 (2 phosphorylated)/SRE gene complex demand                                                                                                 | Irreversible     |
| DM_GSK3B-2P(c)          | glycogen synthase kinase 3 beta (2 phosphorylated) demand                                                                                       | Irreversible     |
| DM_HH3-P(n)             | histone H3 (phosphorylated) demand                                                                                                              | Irreversible     |
| DM_HMG14-P(n)           | high-mobility group nucleosome binding domain 1 (phosphorylated) demand                                                                         | Irreversible     |
| DM_HSP27-3P(c)          | heat shock protein 27kDa (3 phosphorylated) demand                                                                                              | Irreversible     |
| DM_IKK-3P(c)            | inhibitor of kappa light polypeptide gene enhancer in B-cells kinase alpha(dimer)/beta(dimer)/gamma(tetramer) complex (6 phosphorylated) demand | Irreversible     |
| DM_IKK_SRC(c)           | inhibitor of kappa light polypeptide gene enhancer in B-cells kinase alpha/beta/gamma(dimer)/c-Src complex demand                               | Irreversible     |
| DM_IL1R1/L/AP-P(c)      | interleukin 1 receptor type 1/ligand/accessory protein complex (phosphorylated) demand                                                          | Irreversible     |
| DM_IL1R1_LIG(c)         | interleukin 1 receptor, type 1 ligand (generic) demand                                                                                          | Irreversible     |
| DM_IL1R2/AP(c)          | interleukin 1 receptor type 2/accessory protein complex demand                                                                                  | Irreversible     |
| DM_IRAK1_MAP3K3-3P3U(c) | IRAK1/TIFA/TRAF6 (dimer)/Ubc13/Uev1A/MAP3K3 complex (3 phosphorylated, 3 ubiquitinated) demand                                                  | Irreversible     |

|                           |                                                                                            |              |
|---------------------------|--------------------------------------------------------------------------------------------|--------------|
| DM_IRAK1_PLNO3(c)         | IRAK1/Pellino3 complex demand                                                              | Irreversible |
| DM_IRAK_TOLLIP_TIR(c)     | IRAK4/IRAK1c/MyD88(dimer)/TIR/TOLLIP/TRAF6-D complex demand                                | Irreversible |
| DM_ISRE_IRF3(n)           | ISRE/IRF3 complex (2 phosphorylated) demand                                                | Irreversible |
| DM_ISRE_IRF7(n)           | ISRE/IRF7 complex (2 phosphorylated) demand                                                | Irreversible |
| DM_KSR1_RAF1-7P(c)        | KSR1/MAP2K1/Raf-1 complex (7 phosphorylated) demand                                        | Irreversible |
| DM_MAP3K5-2P(c)           | mitogen-activated protein kinase kinase kinase 5 (2 phosphorylated) demand                 | Irreversible |
| DM_MAP3K7IP_TRAF6-5P3U(c) | MAP3K7/IP23/1/TRAF6 (dimer)/Ubc13/Uev1A complex (5 phosphorylated, 3 ubiquitinated) demand | Irreversible |
| DM_MAP3K8(p58)_KSR2(c)    | mitogen-activated protein kinase kinase 8 (p58)/KSR2 complex (phosphorylated) demand       | Irreversible |
| DM_MBP-P(c)               | myelin basic protein (phosphorylated) demand                                               | Irreversible |
| DM_MD2-D(c)               | MD-2 (dimer) demand                                                                        | Irreversible |
| DM_MKNK2-P(c)             | MAP kinase interacting serine/threonine kinase 2 demand                                    | Irreversible |
| DM_MYC-2P(n)              | c-Myc (2 phosphorylated) demand                                                            | Irreversible |
| DM_MYD88_MyD88S(c)        | MyD88/MyD88s complex demand                                                                | Irreversible |
| DM_NFKB(p50)(n)           | NF-kappa-B (p50) demand                                                                    | Irreversible |
| DM_NFKB(p50)_BCL3(n)      | NF-kappa-B (p50 dimer)/Bcl-3 complex (2 phosphorylated) demand                             | Irreversible |
| DM_NFKB(p50)_IKBZ(n)      | NF-kappa-B (p50 dimer)/I-kappa-B-zeta complex (2 phosphorylated) demand                    | Irreversible |
| DM_NFKB(p50/p65)-5P5A(n)  | NF-kappa-B (p50/p65) complex (5 phosphorylated, 5 acetylated) demand                       | Irreversible |
| DM_NFKB_FRAG(c)           | NF-kB processing fragment demand                                                           | Irreversible |
| DM_NFKB_FRAG2(c)          | NF-kB fragment 2 demand                                                                    | Irreversible |
| DM_NFKB_IKBB-7P(c)        | NF-kappa-B (p50/p65)/I-kappa-B-beta complex (7 phosphorylated) demand                      | Irreversible |
| DM_NSF_EEA1_RAB5(v)       | NSF/Syntaxin 13/EEA1 (dimer)/PI3P/Rab5/GTP complex demand                                  | Irreversible |
| DM_PHOX_GTP-3P(v)         | gp91/p22/p40/p47 (3 phosphorylated)/p67PHOX/Rac1/GTP complex demand                        | Irreversible |
| DM_PHOX_GTP-8P(v)         | gp91/p22/p40/p47 (8 phosphorylated)/p67PHOX/Rac1/GTP complex demand                        | Irreversible |
| DM_PLNO1_IRAK4(c)         | pellino1/TIR/MyD88(dimer)/IRAK4 complex demand                                             | Irreversible |
| DM_PLNO1_IRAK4_TIRAP(c)   | pellino1/TIR/TIRAP/MyD88 (dimer)/IRAK4 complex demand                                      | Irreversible |
| DM_RAS_GTP_RIN1(c)        | Ras family small GTP-binding protein (generic)/gtp/Ras and Rab interactor 1 complex demand | Irreversible |
| DM_RIP2_TRIP6_NOD1P(c)    | RIP2/TRIP6/NOD1P complex demand                                                            | Irreversible |
| DM_RKIP_MAP3K14(c)        | RKIP/MAP3K14 (NIK) complex demand                                                          | Irreversible |
| DM_RKIP_MAP3K7IP_TRAF6(c) | RKIP/MAP3K7/IP/Ubc13/Uev1A/TRAF6 (dimer) complex demand                                    | Irreversible |
| DM_ST2L_TIRAP(c)          | ST2L/TIRAP/MyD88(dimer) complex demand                                                     | Irreversible |
| DM_STLR2/L_SCD14(c)       | soluble TLR2/ligand/soluble CD14 complex demand                                            | Irreversible |
| DM_STLR2_CD14(c)          | soluble TLR2/CD14 complex demand                                                           | Irreversible |
| DM_STLR4/L_MD2(c)         | soluble TLR4/ligand/MD-2 complex demand                                                    | Irreversible |
| DM_TIR_MYD_TOLLIP(c)      | TIR/TIRAP/MyD88(dimer)/IRAK1C/IRAK4/TOLLIP complex demand                                  | Irreversible |
| DM_TIR_TIRAP_IRAK2(c)     | TIR/TIRAP/MyD88(dimer)/IRAK4/IRAK2 complex demand                                          | Irreversible |
| DM_TLR4_SIGIRR_TRAF6(c)   | TLR4/SIGIRR/TRAF6 (dimer) complex demand                                                   | Irreversible |
| DM_TLR5_SIGIRR_TRAF6(c)   | TLR5/SIGIRR/TRAF6 (dimer) complex demand                                                   | Irreversible |
| DM_TLR9_SIGIRR_TRAF6(c)   | TLR9/SIGIRR/TRAF6 (dimer) complex demand                                                   | Irreversible |
| DM_TLRL1/10(c)            | Toll-like receptor 1/10 ligand (generic) demand                                            | Irreversible |
| DM_TLRL1/2(c)             | Toll-like receptor 1/2 ligand (generic) demand                                             | Irreversible |
| DM_TLRL10(c)              | Toll-like receptor 10 ligand (generic) demand                                              | Irreversible |
| DM_TLRL11(c)              | Toll-like receptor 11 ligand (generic) demand                                              | Irreversible |
| DM_TLRL2(c)               | Toll-like receptor 2 ligand (generic) demand                                               | Irreversible |
| DM_TLRL2/10(c)            | Toll-like receptor 2/10 ligand (generic) demand                                            | Irreversible |
| DM_TLRL2/6(c)             | Toll-like receptor 2/6 ligand (generic) demand                                             | Irreversible |
| DM_TLRL3(c)               | Toll-like receptor 3 ligand (generic) demand                                               | Irreversible |
| DM_TLRL4(c)               | Toll-like receptor 4 ligand (generic) demand                                               | Irreversible |
| DM_TLRL5(c)               | Toll-like receptor 5 ligand (generic) demand                                               | Irreversible |
| DM_TLRL7(c)               | Toll-like receptor 7 ligand (generic) demand                                               | Irreversible |

|                          |                                                                                        |              |
|--------------------------|----------------------------------------------------------------------------------------|--------------|
| DM_TLRL8(c)              | Toll-like receptor 8 ligand (generic) demand                                           | Irreversible |
| DM_TLRL9(c)              | Toll-like receptor 9 ligand (generic) demand                                           | Irreversible |
| DM_TOLLIP_pail345p_hs(c) | Toll interacting protein/phosphatidylinositol 3,4,5-trisphosphate complex demand       | Irreversible |
| DM_TOLLIP_pail3p_hs(c)   | Toll-interacting protein/phosphatidylinositol 3-phosphate demand                       | Irreversible |
| DM_TRAF6-UD(c)           | tumor necrosis factor (TNF) receptor-associated factor 6 (ubiquitinated, dimer) demand | Irreversible |
| DM_TRAF6_SIGIRR(c)       | TRAF6 (dimer)/SIGIRR (dimer) complex demand                                            | Irreversible |
| EX_26dap-LL(e)           | LL-2,6-Diaminoheptanedioate exchange                                                   | Reversible   |
| EX_ALPS(e)               | Atypical lipopolysaccharide exchange                                                   | Reversible   |
| EX_BDFN2(e)              | beta defensin 2 exchange                                                               | Reversible   |
| EX_BPM(e)                | Bropirimine exchange                                                                   | Reversible   |
| EX_CPGCIGC(e)            | CpG chromatin IgG2a complexes exchange                                                 | Reversible   |
| EX_CSGA(e)               | CsgA exchange                                                                          | Reversible   |
| EX_DCLDLPP(e)            | Diacetylated lipopeptides exchange                                                     | Reversible   |
| EX_DCLLPP(e)             | Diacyl lipopeptides exchange                                                           | Reversible   |
| EX_DSRNA(e)              | Double stranded RNA exchange                                                           | Reversible   |
| EX_ENVP(e)               | Envelope protein exchange                                                              | Reversible   |
| EX_FBNG(e)               | Fibrinogen exchange                                                                    | Reversible   |
| EX_FLGN(e)               | Flagellin exchange                                                                     | Reversible   |
| EX_FUSP(e)               | Fusion protein exchange                                                                | Reversible   |
| EX_GCSPL(e)              | Glycoinositol phospholipids exchange                                                   | Reversible   |
| EX_GLC(e)                | Glycolipids exchange                                                                   | Reversible   |
| EX_HSP60(e)              | Heat shock protein 60 exchange                                                         | Reversible   |
| EX_HSP70(e)              | Heat shock protein 70 exchange                                                         | Reversible   |
| EX_IMQ(e)                | Imidazoquinoline exchange                                                              | Reversible   |
| EX_LAM(e)                | Lipoarabinomannan exchange                                                             | Reversible   |
| EX_LP(e)                 | Lipoprotein exchange                                                                   | Reversible   |
| EX_LPPS(e)               | Lipopeptides exchange                                                                  | Reversible   |
| EX_LPS_HS(e)             | Lipopolysaccharide (Homo sapiens) exchange                                             | Reversible   |
| EX_LTA(e)                | Lipoteichoic acid exchange                                                             | Reversible   |
| EX_LXR(e)                | Loxoribine exchange                                                                    | Reversible   |
| EX_MRAP(e)               | Mannuronic acid polymer exchange                                                       | Reversible   |
| EX_MRDP(e)               | muramyl dipeptide exchange                                                             | Reversible   |
| EX_MRNA(e)               | mRNA (generic) exchange                                                                | Reversible   |
| EX_OLSCHYA(e)            | Oligosaccharides of hyaluronic acid exchange                                           | Reversible   |
| EX_OMPA(e)               | Outer membrane protein A exchange                                                      | Reversible   |
| EX_OSPALP(e)             | Outer surface protein A lipoprotein exchange                                           | Reversible   |
| EX_PLP(e)                | Profilin-like protein exchange                                                         | Reversible   |
| EX_PRNS(e)               | Porins exchange                                                                        | Reversible   |
| EX_PSCHPS(e)             | Polysaccharide fragment of heparan sulphate exchange                                   | Reversible   |
| EX_PSM(e)                | Phenol-soluble modulins exchange                                                       | Reversible   |
| EX_PTG_HS(e)             | Peptidoglycan (Homo sapiens) exchange                                                  | Reversible   |
| EX_SF(e)                 | Soluble factors exchange                                                               | Reversible   |
| EX_SSRNA(e)              | Single stranded RNA exchange                                                           | Reversible   |
| EX_STF(e)                | Small molecule transcription factors exchange                                          | Reversible   |
| EX_T3RFBN(e)             | Type III repeat extra domain A of fibronectin exchange                                 | Reversible   |
| EX_TCLDLPP(e)            | Triacetylated lipopeptides exchange                                                    | Reversible   |
| EX_TLRL1/10(e)           | Toll-like receptor 1/10 ligand (generic) exchange                                      | Reversible   |
| EX_TLRL10(e)             | Toll-like receptor 10 ligand (generic) exchange                                        | Reversible   |
| EX_TLRL2/10(e)           | Toll-like receptor 2/10 ligand (generic) exchange                                      | Reversible   |
| EX_TXL(e)                | Taxol exchange                                                                         | Reversible   |
| EX_UBIQ(e)               | Ubiquitin exchange                                                                     | Reversible   |
| EX_UMLCPGD(e)            | Unmethylated CpG DNA exchange                                                          | Reversible   |
| EX_UNKN(e)               | Unknown TLR11 ligand exchange                                                          | Reversible   |
| EX_ZMS(e)                | Zymosan exchange                                                                       | Reversible   |
| EX_ac(e)                 | Acetate exchange                                                                       | Reversible   |
| EX_accoa(e)              | Acetyl-CoA exchange                                                                    | Reversible   |

|                   |                                                                    |            |
|-------------------|--------------------------------------------------------------------|------------|
| EX_adp            | adp exchange                                                       | Reversible |
| EX_atp(e)         | ATP exchange                                                       | Reversible |
| EX_ca2(e)         | Calcium exchange                                                   | Reversible |
| EX_chol(e)        | Choline exchange                                                   | Reversible |
| EX_coa(e)         | Coenzyme A exchange                                                | Reversible |
| EX_dag_hs(e)      | diacylglycerol (homo sapiens) exchange                             | Reversible |
| EX_gdp(e)         | GDP exchange                                                       | Reversible |
| EX_gtp(e)         | GTP exchange                                                       | Reversible |
| EX_h(e)           | H+ exchange                                                        | Reversible |
| EX_h2o(e)         | H2O exchange                                                       | Reversible |
| EX_h2o2(e)        | Hydrogen peroxide exchange                                         | Reversible |
| EX_mi145p(e)      | 1D-myo-Inositol 1,4,5-trisphosphate exchange                       | Reversible |
| EX_nadp(e)        | Nicotinamide adenine dinucleotide phosphate exchange               | Reversible |
| EX_nadph(e)       | Nicotinamide adenine dinucleotide phosphate - reduced exchange     | Reversible |
| EX_pa_hs(e)       | phosphatidic acid (homo sapiens) exchange                          | Reversible |
| EX_pail345p_hs(e) | phosphatidylinositol-3,4,5-trisphosphate (Homo sapiens) exchange   | Reversible |
| EX_pail4p_hs(e)   | 1-Phosphatidyl-1D-myo-inositol 4-phosphate (Homo sapiens) exchange | Reversible |
| EX_pail_hs(e)     | phosphatidylinositol (homo sapiens) exchange                       | Reversible |
| EX_pchol_hs(e)    | Phosphatidylcholine (homo sapiens) exchange                        | Reversible |
| EX_pi(e)          | Phosphate exchange                                                 | Reversible |
| EX_ps_hs(e)       | phosphatidylserine (homo sapiens) exchange                         | Reversible |
| sink_A20          | sink_A20                                                           | Reversible |
| sink_ABIN         | sink_ABIN                                                          | Reversible |
| sink_AKT          | sink_AKT                                                           | Reversible |
| sink_AP1_GENE     | sink_AP1_GENE                                                      | Reversible |
| sink_ATF2         | sink_ATF2                                                          | Reversible |
| sink_BCL3         | sink_BCL3                                                          | Reversible |
| sink_BTK          | sink_BTK                                                           | Reversible |
| sink_CD14         | sink_CD14                                                          | Reversible |
| sink_CREB         | sink_CREB                                                          | Reversible |
| sink_CRE_GENE     | sink_CRE_GENE                                                      | Reversible |
| sink_EEA1         | sink_EEA1                                                          | Reversible |
| sink_EIF2A        | sink_EIF2A                                                         | Reversible |
| sink_EIF4E        | sink_EIF4E                                                         | Reversible |
| sink_ELK1         | sink_ELK1                                                          | Reversible |
| sink_FMAP3K1      | sink_FMAP3K1                                                       | Reversible |
| sink_FOS          | sink_FOS                                                           | Reversible |
| sink_GP91PHOX     | sink_GP91PHOX                                                      | Reversible |
| sink_GSK3B        | sink_GSK3B                                                         | Reversible |
| sink_HH3          | sink_HH3                                                           | Reversible |
| sink_HMG14        | sink_HMG14                                                         | Reversible |
| sink_HSP27        | sink_HSP27                                                         | Reversible |
| sink_IBTK         | sink_IBTK                                                          | Reversible |
| sink_IKBA         | sink_IKBA                                                          | Reversible |
| sink_IKBB         | sink_IKBB                                                          | Reversible |
| sink_IKBZ         | sink_IKBZ                                                          | Reversible |
| sink_IKK          | sink_IKK                                                           | Reversible |
| sink_IL1R2        | sink_IL1R2                                                         | Reversible |
| sink_IL1RAP       | sink_IL1RAP                                                        | Reversible |
| sink_IRAK1        | sink_IRAK1                                                         | Reversible |
| sink_IRAK1C       | sink_IRAK1C                                                        | Reversible |
| sink_IRAK2        | sink_IRAK2                                                         | Reversible |
| sink_IRAK4        | sink_IRAK4                                                         | Reversible |
| sink_IRF3         | sink_IRF3                                                          | Reversible |
| sink_IRF7         | sink_IRF7                                                          | Reversible |
| sink_ISRE         | sink_ISRE                                                          | Reversible |
| sink_JUN          | sink_JUN                                                           | Reversible |

|                  |                  |            |
|------------------|------------------|------------|
| sink_KSR1        | sink_KSR1        | Reversible |
| sink_KSR2        | sink_KSR2        | Reversible |
| sink_LBP         | sink_LBP         | Reversible |
| sink_MAP2K1      | sink_MAP2K1      | Reversible |
| sink_MAP3K14     | sink_MAP3K14     | Reversible |
| sink_MAP3K3      | sink_MAP3K3      | Reversible |
| sink_MAP3K5      | sink_MAP3K5      | Reversible |
| sink_MAP3K7      | sink_MAP3K7      | Reversible |
| sink_MAP3K7IP1   | sink_MAP3K7IP1   | Reversible |
| sink_MAP3K7IP2/3 | sink_MAP3K7IP2/3 | Reversible |
| sink_MAP3K8(p52) | sink_MAP3K8(p52) | Reversible |
| sink_MAP3K8(p58) | sink_MAP3K8(p58) | Reversible |
| sink_MBP         | sink_MBP         | Reversible |
| sink_MD2         | sink_MD2         | Reversible |
| sink_MKNK2       | sink_MKNK2       | Reversible |
| sink_MYC         | sink_MYC         | Reversible |
| sink_MYD88       | sink_MYD88       | Reversible |
| sink_MYD88S      | sink_MYD88S      | Reversible |
| sink_NFKB(p105)  | sink_NFKB(p105)  | Reversible |
| sink_NFKB(p65)   | sink_NFKB(p65)   | Reversible |
| sink_NOD1        | sink_NOD1        | Reversible |
| sink_NSF         | sink_NSF         | Reversible |
| sink_P22PHOX     | sink_P22PHOX     | Reversible |
| sink_P40PHOX     | sink_P40PHOX     | Reversible |
| sink_P47PHOX     | sink_P47PHOX     | Reversible |
| sink_P67PHOX     | sink_P67PHOX     | Reversible |
| sink_PCASP8      | sink_PCASP8      | Reversible |
| sink_PCASP9      | sink_PCASP9      | Reversible |
| sink_PLNO1       | sink_PLNO1       | Reversible |
| sink_PLNO3       | sink_PLNO3       | Reversible |
| sink_PRE_IL1A    | sink_PRE_IL1A    | Reversible |
| sink_PRE_IL1B    | sink_PRE_IL1B    | Reversible |
| sink_RAB5_GDP    | sink_RAB5_GDP    | Reversible |
| sink_RAC1_GDP    | sink_RAC1_GDP    | Reversible |
| sink_RAF1        | sink_RAF1        | Reversible |
| sink_RAS_GDP     | sink_RAS_GDP     | Reversible |
| sink_RIN1        | sink_RIN1        | Reversible |
| sink_RIP1        | sink_RIP1        | Reversible |
| sink_RIP2        | sink_RIP2        | Reversible |
| sink_RKIP        | sink_RKIP        | Reversible |
| sink_SCD14       | sink_SCD14       | Reversible |
| sink_SH3BP5      | sink_SH3BP5      | Reversible |
| sink_SIGIRR      | sink_SIGIRR      | Reversible |
| sink_SRCK        | sink_SRCK        | Reversible |
| sink_SRE_GENE    | sink_SRE_GENE    | Reversible |
| sink_ST2L        | sink_ST2L        | Reversible |
| sink_STLR2       | sink_STLR2       | Reversible |
| sink_STLR4       | sink_STLR4       | Reversible |
| sink_STXN13      | sink_STXN13      | Reversible |
| sink_TIFA        | sink_TIFA        | Reversible |
| sink_TIR         | sink_TIR         | Reversible |
| sink_TIRAP       | sink_TIRAP       | Reversible |
| sink_TLR4        | sink_TLR4        | Reversible |
| sink_TLR5        | sink_TLR5        | Reversible |
| sink_TLR9        | sink_TLR9        | Reversible |
| sink_TOLLIP      | sink_TOLLIP      | Reversible |
| sink_TRAF6       | sink_TRAF6       | Reversible |
| sink_TRIP6       | sink_TRIP6       | Reversible |

|                      |                                                                                    |              |
|----------------------|------------------------------------------------------------------------------------|--------------|
| sink_UBC13           | sink_UBC13                                                                         | Reversible   |
| sink_UEV1A           | sink_UEV1A                                                                         | Reversible   |
| 14-3-3_KSR1_BIND     | 14-3-3-KSR1-MKK1 binding                                                           | Irreversible |
| 14-3-3_RAF1_BIND     | 14-3-3-Raf1 binding                                                                | Irreversible |
| 26dap-LLti           | diaminopimelic acid transporter, irreversible                                      | Irreversible |
| 26dap-LLti2          | diaminopimelic acid transporter 2, irreversible                                    | Irreversible |
| ABIN_A20_BIND        | ABIN-A20 binding                                                                   | Irreversible |
| ACCOAt               | AcCoA transporter                                                                  | Reversible   |
| ACCOAtn              | acetyl-CoA transport, nuclear                                                      | Reversible   |
| ACt                  | Acetate exchange, diffusion                                                        | Irreversible |
| ACt2                 | acetate transport in via proton symport                                            | Irreversible |
| ACtn                 | Acetate transport, nucleus                                                         | Reversible   |
| ADPtl                | ADP transporter, lysosome                                                          | Reversible   |
| ADPtn                | ADP transporter, nucleus                                                           | Reversible   |
| AJUBA_CPX_BIND       | Ajuba-IRAK1/TRAF6 (dimer)/TIFA/Ubc13/Uev1A-sequestosome1/PKCzeta binding           | Irreversible |
| AJUBA_CPX_IKK        | PKCzeta-mediated IKK phosphorylation                                               | Irreversible |
| AJUBA_CPX_PHOS       | Ajuba/TRAF6 (dimer)/IRAK1/PKCz/TIFA/Sequestosome 1/Ubc13/Uev1A autophosphorylation | Irreversible |
| AKT_GSK3B            | Akt-mediated GSK3beta phosphorylation                                              | Irreversible |
| AKT_IKK              | Akt-mediated IKK phosphorylation                                                   | Irreversible |
| AKT_MAP3K3           | Akt-mediated MAP3K3 phosphorylation                                                | Irreversible |
| AKT_MAP3K5           | Akt-mediated MAP3K5 diphosphorylation                                              | Irreversible |
| AKT_PHOS             | Akt autophosphorylation                                                            | Irreversible |
| AKT_RAF1             | Akt-mediated Raf-1 phosphorylation                                                 | Irreversible |
| AKT_TRAN             | Akt transport                                                                      | Irreversible |
| AKT_pail345p_hs_BIND | Akt-phosphatidylinositol 3,4,5-trisphosphate binding                               | Irreversible |
| AKT_pail345p_hs DISS | Akt-phosphatidylinositol 3,4,5-trisphosphate dissociation                          | Irreversible |
| ALPS_TLRL2           | Toll-like receptor 2 ligand (Atypical lipopolysaccharide)                          | Irreversible |
| AP1_FOS_JUN_BIND     | AP-1 site-cFos-cJun binding                                                        | Irreversible |
| AP1_JUN_BIND         | AP-1 site-cJun binding                                                             | Irreversible |
| ATPtl                | ATP transporter, lysosome                                                          | Reversible   |
| ATPtn                | ATP diffusion in nucleus                                                           | Reversible   |
| BCL3_TRAN            | Bcl-3 transport                                                                    | Reversible   |
| BDFN2_TLRL4          | Toll-like receptor 4 ligand (beta defensin 2)                                      | Irreversible |
| BPM_TLRL7            | Toll-like receptor 7 ligand (Bropirimine)                                          | Irreversible |
| BTK_2PHOS            | BTK autophosphorylation                                                            | Irreversible |
| BTK_CBL_BIND         | BTK-cCbl binding                                                                   | Irreversible |
| BTK_DEGR             | BTK degradation                                                                    | Irreversible |
| BTK_IBTK_BIND        | BTK-iBTK binding                                                                   | Irreversible |
| BTK_PLCG             | BTK-mediated PLCgamma phosphorylation                                              | Irreversible |
| BTK_SH3BP5_BIND      | BTK-SH3BP5(Sab) binding                                                            | Irreversible |
| BTK_UBIQ             | BTK ubiquitination                                                                 | Irreversible |
| BTK_VAV1             | BTK-mediated Vav1 phosphorylation                                                  | Irreversible |
| BTK_pail345p_hs_BIND | BTK-phosphatidylinositol 3,4,5-trisphosphate binding                               | Irreversible |
| CA2t                 | calcium (Ca+2) transport via diffusion (extracellular to periplasm)                | Reversible   |
| CA2tr                | calcium (Ca+2) transport, endoplasmic                                              | Reversible   |
| CALPN_3ca2_BIND      | calpain-calcium ion binding                                                        | Irreversible |
| CAMK2_SERCA          | CaMK2-mediated SERCA phosphorylation                                               | Irreversible |
| CAM_3ca2_BIND        | calmodulin-calcium ion binding                                                     | Irreversible |
| CAM_CAMK2_BIND       | calmodulin (activated)-calmodulin dependent protein kinase 2 binding               | Irreversible |
| CAM_CAMK2_CREB       | CaM/CaMK2-mediated CREB phosphorylation                                            | Irreversible |
| CAM_CAMK2_CREB-2     | CaM/CaMK2-mediated CREB phosphorylation 2                                          | Irreversible |
| CAM_CAMK2_IKK        | CaM/CaMK2-mediated IKK phosphorylation                                             | Irreversible |
| CAM_CAMK2_PHOS       | CaM/CaMK2 autophosphorylation                                                      | Irreversible |
| CAM_CAMK2_TRAN       | CaM/CaMK2 transport                                                                | Irreversible |
| CAM_CAMK2_TRAN2      | CaM/CaMK2 transport 2                                                              | Irreversible |
| CDC42_DEPH           | Cdc42 dephosphorylation                                                            | Irreversible |

|                     |                                                                        |              |
|---------------------|------------------------------------------------------------------------|--------------|
| CDC42_PHOS          | Cdc42 phosphorylation                                                  | Irreversible |
| CDC42_VAV1_BIND     | Cdc42-Vav1 binding                                                     | Irreversible |
| CHOLtu              | Choline uniport                                                        | Reversible   |
| CK2_IKBB            | CK2-mediated IkBb phosphorylation                                      | Irreversible |
| CK2_NFKB            | casein kinase 2-mediated NF-kB (p50/p65) phosphorylation               | Irreversible |
| CK2_NFKB_P4K        | NF-kB P4 kinase (CK2)                                                  | Irreversible |
| CK2_PHOS            | casein kinase 2 autophosphorylation                                    | Irreversible |
| COAt                | CoA transporter                                                        | Reversible   |
| COAtn               | coenzyme A transport, nuclear                                          | Reversible   |
| CPGCIGC_TLRL9       | Toll-like receptor 9 ligand (CpG chromatin IgG2a complexes)            | Irreversible |
| CREB_CBP_BIND       | CREB/CRE-CBP binding                                                   | Irreversible |
| CREB_CBP DISS       | CREB/CRE site/CBP dissociation                                         | Irreversible |
| CREB_CBP DISS2      | CREB/CRE site/CBP dissociation 2                                       | Irreversible |
| CREB_CRE_BIND       | CREB-CRE site binding                                                  | Irreversible |
| CREB_DIME           | CRE-binding protein dimerization                                       | Irreversible |
| CSGA_TLRL2          | Toll-like receptor 2 ligand (CsgA)                                     | Irreversible |
| CTAK1_KSR1          | CTAK1-mediated KSR1 phosphorylation                                    | Irreversible |
| CTAK1_PHOS          | C-TAK1 autophosphorylation                                             | Irreversible |
| DAGK_PHOS           | DAGK phosphorylation                                                   | Irreversible |
| DAGK_dag_hs         | DAGK-mediated dag_hs phosphorylation                                   | Irreversible |
| DAGt                | diacylglycerol 2 (homo sapiens) transport                              | Reversible   |
| DCLDLPP_TLRL2/6     | Toll-like receptor 2/6 ligand (Diacylated lipopeptides)                | Irreversible |
| DCLLPP_TLRL2/6      | Toll-like receptor 2/6 ligand (Diacyl lipopeptides)                    | Irreversible |
| DSRNA_TLRL3         | Toll-like receptor 3 ligand (Double stranded RNA)                      | Irreversible |
| EEA1_DIME           | EEA1 dimerization                                                      | Irreversible |
| EEA1_pai13p_hs_BIND | EEA1(dimer)-PI(3)P binding                                             | Irreversible |
| ELK1_DEPH           | PP2B-mediated Elk-1 dephosphorylation                                  | Irreversible |
| ELK1_SRE_BIND       | Elk1-SRE site binding                                                  | Irreversible |
| ENVP_TLRL4          | Toll-like receptor 4 ligand (Envelope protein)                         | Irreversible |
| FADD_PCASP8_BIND    | FADD-pro caspase8 binding                                              | Irreversible |
| FADD_PCASP8_BIND2   | FADD-pro caspase8 binding 2                                            | Irreversible |
| FBNG_TLRL4          | Toll-like receptor 4 ligand (Fibrinogen)                               | Irreversible |
| FLGN_TLRL5          | Toll-like receptor 5 ligand (Flagellin)                                | Irreversible |
| FMAP3K1_PROC        | full length MAP3K1 processing                                          | Irreversible |
| FOS_DEGR            | c-Fos degradation                                                      | Irreversible |
| FOS_DEPH            | PP2A-mediated c-Fos dephosphorylation                                  | Irreversible |
| FOS_JUN_BIND        | cFos-cJun binding                                                      | Irreversible |
| FUSP_TLRL4          | Toll-like receptor 4 ligand (Fusion protein)                           | Irreversible |
| GCSPL_TLRL2         | Toll-like receptor 2 ligand (Glycoinositol phospholipids)              | Irreversible |
| GENERIC_DA_DACL     | unknown deacetylase deacetylation                                      | Irreversible |
| GENERIC_K_PHOS      | unknown kinase autophosphorylation                                     | Irreversible |
| GENERIC_K_RAF1      | unknown kinase phosphorylation of Raf-1                                | Irreversible |
| GENERIC_PPDA_NFKB   | unknown mechanism of NF-kB (p50/p65) dephosphorylation/deacetylation   | Irreversible |
| GENERIC_PPDA_NFKB2  | unknown mechanism of NF-kB (p50/p65) dephosphorylation/deacetylation 2 | Irreversible |
| GENERIC_PP_DEPH     | unknown phosphatase dephosphorylation (regeneration)                   | Irreversible |
| GENERIC_PP_NFKB     | unknown mechanism of NF-kB (p50/p65) dephosphorylation                 | Irreversible |
| GLC_TLRL2           | Toll-like receptor 2 ligand (Glycolipids)                              | Irreversible |
| GP91_P22PHOX_BIND   | gp91-p22 phox binding                                                  | Irreversible |
| GSK3B_NFKB          | GSK3beta-mediated NF-kB (p50/p65) phosphorylation                      | Irreversible |
| GSK3B_NFKB_P3K      | NF-kB P3 kinase (GSK3b)                                                | Irreversible |
| GSK3B_PHOS          | GSK3B autophosphorylation                                              | Irreversible |
| GSK3B_TRAN          | GSK3B transport                                                        | Irreversible |
| GSK3B_TRAN2         | GSK3B transport 2                                                      | Irreversible |
| H2O2t               | hydrogen peroxide transport via diffusion                              | Reversible   |
| H2Ot                | H2O transport via diffusion                                            | Reversible   |
| H2Otn               | H2O transport, nuclear                                                 | Reversible   |

|                           |                                                       |              |
|---------------------------|-------------------------------------------------------|--------------|
| HDAC3_DACL                | histone deacetylase 3 deacetylation                   | Irreversible |
| HNRNPA1_DEPH              | PP2A-mediated hnRNPA1 dephosphorylation               | Irreversible |
| HSP60_TLRL4               | Toll-like receptor 4 ligand (Heat shock protein 60)   | Irreversible |
| HSP70_TLRL2               | Toll-like receptor 2 ligand (heat shock protein 70)   | Irreversible |
| HSP70_TLRL4               | Toll-like receptor 4 ligand (heat shock protein 70)   | Irreversible |
| Ht                        | proton diffusion                                      | Reversible   |
| Htl                       | proton transport, lysosome                            | Reversible   |
| Htn                       | proton transport, nuclear                             | Reversible   |
| IKBA_DEGR                 | I-kappa-B-alpha degradation                           | Irreversible |
| IKBA_DEGR2                | I-kappa-B-alpha degradation 2                         | Irreversible |
| IKBA_TRAN                 | IkBa transport                                        | Irreversible |
| IKBA_UBIQ                 | IkBa ubiquitination                                   | Irreversible |
| IKBA_UBIQ2                | IkBa ubiquitination 2                                 | Irreversible |
| IKBA_UBIQ3                | IkBa ubiquitination 3                                 | Irreversible |
| IKBA_UBIQ4                | IkBa ubiquitination 4                                 | Irreversible |
| IKBB_DEGR                 | I-kappa-B-beta degradation (2 phos, 1 ubi form)       | Irreversible |
| IKBB_DEGR2                | I-kappa-B-beta degradation 2 (2 phos, 2 ubi form)     | Irreversible |
| IKBB_TRAN                 | IkBb transport                                        | Irreversible |
| IKBB_UBIQ                 | IkBb ubiquitination                                   | Irreversible |
| IKKE_IRF3                 | IKKe-mediated IRF3 phosphorylation                    | Irreversible |
| IKKE_NFKB                 | IKKepsilon-mediated NF-kB (p50/p65) phosphorylation   | Irreversible |
| IKKE_NFKB2                | IKKepsilon-mediated NF-kB (p50/p65) phosphorylation 2 | Irreversible |
| IKKE_NFKB_P3K             | NF-kB P3 kinase (IKKe)                                | Irreversible |
| IKKE_NFKB_P5K             | NF-kB P5 kinase (IKKe)                                | Irreversible |
| IKKE_PHOS                 | IKKepsilon autophosphorylation                        | Irreversible |
| IKK_6PHOS                 | IKK autophosphorylation                               | Irreversible |
| IKK_IKBA                  | IKK-mediated IkBa phosphorylation                     | Irreversible |
| IKK_IKBB                  | IKK-mediated IkBb phosphorylation                     | Irreversible |
| IKK_MAP3K8                | IKK-mediated MAP3K8 phosphorylation                   | Irreversible |
| IKK_MAP3K8(p52)_NFKB      | IKK-mediated MAP3K8(p52)/NFkB phosphorylation         | Irreversible |
| IKK_NFKB                  | IKK-mediated NF-kB (p50/p65) phosphorylation          | Irreversible |
| IKK_NFKB(p105)            | IKK-mediated NFkB(p105) precursor phosphorylation     | Irreversible |
| IKK_NFKB2                 | IKK-mediated NF-kB (p50/p65) phosphorylation 2        | Irreversible |
| IKK_NFKB3                 | IKK-mediated NF-kB (p50/p65) phosphorylation 3        | Irreversible |
| IKK_NFKB_P3K              | NF-kB P3 kinase (IKKbeta)                             | Irreversible |
| IKK_NFKB_P5K              | NF-kB P5 kinase (IKKbeta)                             | Irreversible |
| IKK_NFKB_P5K2             | NF-kB P5 kinase (IKKalpha)                            | Irreversible |
| IKK_PKR_BIND              | IKK/PKR (dimer) binding                               | Irreversible |
| IKK_PKR_PHOS              | IKK/PKR (dimer) phosphorylation                       | Irreversible |
| IKK_PKR_TRAF6_BIND        | IKK-PKR (dimer)/TRAF6 (dimer) binding                 | Irreversible |
| IKK_PKR_TRAF6_PHOS        | IKK/PKR (dimer)/TRAF6 (dimer) phosphorylation         | Irreversible |
| IKK_RIP1_TICAM1P_BIND     | IKK-RIP1/TICAM1P binding                              | Irreversible |
| IKK_RIP1_TICAM1P_PHOS     | IKK/RIP1/TICAM1P phosphorylation                      | Irreversible |
| IKK_RIP2_NOD1P_BIND       | IKK-RIP2/NOD1P binding                                | Irreversible |
| IKK_RIP2_NOD1P_PHOS       | IKK/RIP2/NOD1P phosphorylation                        | Irreversible |
| IKK_RIP2_NOD2P_BIND       | IKK-RIP2/NOD2P binding                                | Irreversible |
| IKK_RIP2_NOD2P_PHOS       | IKK/RIP2/NOD2P phosphorylation                        | Irreversible |
| IKK_RIP2_TRIP6_TRAF2_BIND | IKK-RIP2/TRIP6/TRAF2 binding                          | Irreversible |
| IKK_RIP2_TRIP6_TRAF2_PHOS | IKK/RIP2/TRIP6/TRAF2 phosphorylation                  | Irreversible |
| IKK_SRC_BIND              | IKKalpha/beta/gamma-cSrc binding                      | Irreversible |
| IL1/L/AP_PHOS             | IL1R1/L/AP phosphorylation                            | Irreversible |
| IL1/L_IL1RAP_BIND         | IL1/L-IL1RAP binding                                  | Irreversible |
| IL1A_IL1R1L               | IL-1R1 ligand (IL-1a)                                 | Irreversible |
| IL1A_TRAN                 | IL-1a transport                                       | Irreversible |
| IL1B_IL1R1L               | IL-1R1 ligand (IL-1b)                                 | Irreversible |
| IL1B_TRAN                 | IL-1b transport                                       | Irreversible |
| IL1R1_BIND                | IL-1R1 ligand binding                                 | Irreversible |
| IL1R1_PI3K1A              | IL1R1-mediated PI3K class 1A phosphorylation          | Irreversible |



|                          |                                                                                 |              |
|--------------------------|---------------------------------------------------------------------------------|--------------|
| IL1R2_IL1RAP_BIND        | IL1R2-IL1RAP binding                                                            | Irreversible |
| IMPA3_TRAN               | importin alpha 3 transport                                                      | Irreversible |
| IMQ_TLRL7                | Toll-like receptor 7 ligand (Imidazoquinoline)                                  | Irreversible |
| IMQ_TLRL8                | Toll-like receptor 8 ligand (Imidazoquinoline)                                  | Irreversible |
| IP3R_mi145p_BIND         | inositol 1,4,5-trisphosphate-receptor binding                                   | Irreversible |
| IRAK1C_TOLLIP_BIND       | IRAK1C-TOLLIP binding                                                           | Irreversible |
| IRAK1_DEGR               | IRAK1 degradation                                                               | Irreversible |
| IRAK1_ECSIT_BIND         | IRAK1/TRAF6 (dimer)/TIFA/Ubc13/Uev1A-ECSIT binding                              | Irreversible |
| IRAK1_ECSIT_FMAP3K1_BIND | IRAK1/TIFA/TRAF6 (dimer)/Ubc13/Uev1A/ECSIT-full length MAP3K1-caspase3 binding  | Irreversible |
| IRAK1_MAP3K3_4PHOS       | IRAK1/TRAF6 (dimer)/TIFA/Ubc13/Uev1A/MAP3K3 autophosphorylation                 | Irreversible |
| IRAK1_MAP3K3_BIND        | IRAK1/TRAF6 (dimer)/TIFA/Ubc13/Uev1A-MAP3K3 binding                             | Irreversible |
| IRAK1_MAP3K5_BIND        | IRAK1/TRAF6 (dimer)/TIFA/Ubc13/Uev1A-MAP3K5 binding                             | Irreversible |
| IRAK1_MAP3K7_4PHOS       | IRAK1/TRAF6 (dimer)/TIFA/Ubc13/Uev1A/MAP3K7/IP23/1 phosphorylation              | Irreversible |
| IRAK1_MAP3K7_BIND        | IRAK1/TRAF6 (dimer)/TIFA/Ubc13/Uev1A-MAP3K7/IP23/1 binding                      | Irreversible |
| IRAK1_MAP3K7 DISS        | TRAF6 (dimer)/Ubc13/Uev1A/MAP3K7/IP23/1-IRAK1-TIFA dissociation                 | Irreversible |
| IRAK1_PLNO3_BIND         | IRAK1-Pellino3 binding                                                          | Irreversible |
| IRAK1_TIFA_3UBIQ         | IRAK1/TIFA/TRAF6 (dimer)/Ubc13/Uev1A triubiquitination                          | Irreversible |
| IRAK1_TIFA_A20_BIND      | IRAK1/TIFA/TRAF6 (dimer)/Ubc13/Uev1A-A20 binding                                | Irreversible |
| IRAK1_TIFA_CYLD_BIND     | IRAK1/TIFA/TRAF6 (dimer)/Ubc13/Uev1A-CYLD binding                               | Irreversible |
| IRAK1_TIFA_DEBQ          | CYLD-mediated IRAK1/TIFA/TRAF6 (dimer)/Ubc13/Uev1A deubiquitination             | Irreversible |
| IRAK1_TIFA_DEBQ2         | A20-mediated IRAK1/TIFA/TRAF6 (dimer)/Ubc13/Uev1A deubiquitination              | Irreversible |
| IRAK1_TOLLIP_BIND        | IRAK1-TOLLIP binding                                                            | Irreversible |
| IRAK_MYD_TIR_2PHOS       | IRAK1/IRAK4/MyD88 (dimer)/TIR autophosphorylation 2                             | Irreversible |
| IRAK_MYD_TIR_BIND        | IRAK1-MyD88 (dimer)/TIR/IRAK4 binding                                           | Irreversible |
| IRAK_MYD_TIR_PHOS        | IRAK1/IRAK4/MyD88 (dimer)/TIR autophosphorylation                               | Irreversible |
| IRAK_TOLLIP_TRAF6_BIND   | TIR/MyD88/IRAK4-IRAK1c/TOLLIP-TRAF6 binding                                     | Irreversible |
| IRAK_TRAF6_BIND          | IRAK1/IRAK4/MyD88 (dimer)/TIR-Ubc13-Uev1A-TIFA-TRAF6 (dimer) binding            | Irreversible |
| IRAK_TRAF6 DISS          | IRAK1/TRAF6 (dimer)/TIFA/Ubc13/Uev1A-TIR/MyD88 (dimer)/IRAK4 dissociation       | Irreversible |
| IRAK_TRAF6_TIRAP_BIND    | IRAK1/IRAK4/MyD88 (dimer)/TIRAP/TIR-TRAF6 (dimer)-Ubc13-Uev1A-TIFA binding      | Irreversible |
| IRAK_TRAF6_TIRAP DISS    | IRAK1/TRAF6 (dimer)/TIFA/Ubc13/Uev1A-IRAK4/MyD88 (dimer)/TIR/TIRAP dissociation | Irreversible |
| IRF3_DIME                | IRF3 (2 phosphorylated) dimerization                                            | Irreversible |
| IRF3_ISRE_BIND           | IRF3 (dimer)-ISRE binding                                                       | Irreversible |
| IRF3_TRAN                | IRF3 (dimer) transport                                                          | Irreversible |
| IRF7_ISRE_BIND           | IRF7-ISRE binding                                                               | Irreversible |
| IRF7_TRAN                | IRF7 (dimer) transport                                                          | Irreversible |
| JUN_DEGR                 | c-Jun degradation                                                               | Irreversible |
| JUN_DIME                 | c-Jun dimerization                                                              | Irreversible |
| KSR1_DEPH1               | 14-3-3/KSR1/MKK1 disassociation                                                 | Irreversible |
| KSR1_RAF1_MAPK3/1_7PHOS  | KSR1/Raf-1/MAPK3/1/MAP2K1 autophosphorylation                                   | Irreversible |
| KSR1_RAF1_MAPK3/1_9PHOS  | KSR1/Raf-1/MAPK3/1/MAP2K1 autophosphorylation 2                                 | Irreversible |
| KSR1_RAF1_MAPK3/1_BIND   | KSR1/MAP2K1-Raf1-MAPK3/1 binding                                                | Irreversible |
| KSR1_RAF1_MAPK3/1 DISS   | KSR1/MAP2K1-Raf1-MAPK3/1 dissociation                                           | Irreversible |
| LAM_TLRL2                | Toll-like receptor 2 ligand (Lipoarabinomannan)                                 | Irreversible |
| LPPS_TLRL2               | Toll-like receptor 2 ligand (Lipopeptides)                                      | Irreversible |
| LPS_TLRL2                | Toll-like receptor 2 ligand (Lipopolysaccharide)                                | Irreversible |
| LPS_TLRL4                | Toll-like receptor 4 ligand (Lipopolysaccharide)                                | Irreversible |
| LP_TLRL2                 | Toll-like receptor 2 ligand (Lipoprotein)                                       | Irreversible |
| LTA_TLRL2                | Toll-like receptor 2 ligand (Lipoteichoic acid)                                 | Irreversible |

|                       |                                                              |              |
|-----------------------|--------------------------------------------------------------|--------------|
| LTA_TLRL2/6           | Toll-like receptor 2/6 ligand (Lipoteichoic acid)            | Irreversible |
| LXR_TLRL7             | Toll-like receptor 7 ligand (Loxoribine)                     | Irreversible |
| MAP2K1_MAPK3/1        | MAP2K1-mediated MAPK3/1 phosphorylation                      | Irreversible |
| MAP2K3_MAPK11         | MAP2K3-mediated MAPK11 phosphorylation                       | Irreversible |
| MAP2K3_MAPK14         | MAP2K3-mediated MAPK14 phosphorylation                       | Irreversible |
| MAP2K3_TRAN           | MAP2K3 transport                                             | Irreversible |
| MAP2K3_TRAN2          | MAP2K3 transport 2                                           | Irreversible |
| MAP2K4_MAPK11         | MAP2K4-mediated MAPK11 phosphorylation                       | Irreversible |
| MAP2K4_MAPK14         | MAP2K4-mediated MAPK14 phosphorylation                       | Irreversible |
| MAP2K4_MAPK8          | MAP2K4-mediated MAPK8 phosphorylation                        | Irreversible |
| MAP2K6_MAPK11         | MAP2K6-mediated MAPK11 phosphorylation                       | Irreversible |
| MAP2K6_MAPK14         | MAP2K6-mediated MAPK14 phosphorylation                       | Irreversible |
| MAP2K6_TRAN           | MAP2K6 transport                                             | Irreversible |
| MAP2K6_TRAN2          | MAP2K6 transport 2                                           | Irreversible |
| MAP2K7_MAPK8          | MAP2K7-mediated MAPK8 phosphorylation                        | Irreversible |
| MAP3K14_IKK           | MAP3K14-mediated IKK phosphorylation                         | Irreversible |
| MAP3K1_DEGR           | MAP3K1 degradation                                           | Irreversible |
| MAP3K1_DEGR2          | MAP3K1 degradation 2                                         | Irreversible |
| MAP3K1_IKK            | MAP3K1-mediated IKK phosphorylation                          | Irreversible |
| MAP3K1_MAP2K1         | MAP3K1-mediated MAP2K1 phosphorylation                       | Irreversible |
| MAP3K1_MAP2K4         | MAP3K1-mediated MAP2K4 phosphorylation                       | Irreversible |
| MAP3K1_MAP2K7         | MAP3K1-mediated MAP2K7 phosphorylation                       | Irreversible |
| MAP3K1_PHOS           | MAP3K1 autophosphorylation                                   | Irreversible |
| MAP3K1_UBIQ           | MAP3K1 ubiquitination                                        | Irreversible |
| MAP3K3_MAP2K3         | MAP3K3-mediated MAP2K3 phosphorylation                       | Irreversible |
| MAP3K3_MAP2K4         | MAP3K3-mediated MAP2K4 phosphorylation                       | Irreversible |
| MAP3K3_MAP2K6         | MAP3K3-mediated MAP2K6 phosphorylation                       | Irreversible |
| MAP3K3_MAP2K7         | MAP3K3-mediated MAP2K7 phosphorylation                       | Irreversible |
| MAP3K5_MAP2K3         | MAP3K5-mediated MAP2K3 phosphorylation                       | Irreversible |
| MAP3K5_MAP2K4         | MAP3K5-mediated MAP2K4 phosphorylation                       | Irreversible |
| MAP3K5_MAP2K6         | MAP3K5-mediated MAP2K6 phosphorylation                       | Irreversible |
| MAP3K5_PHOS           | MAP3K5 autophosphorylation                                   | Irreversible |
| MAP3K5_TRXRED_BIND    | MAP3K5-reduced thioredoxin binding                           | Irreversible |
| MAP3K5_TRXRED DISS    | MAP3K5-reduced thioredoxin dissociation                      | Irreversible |
| MAP3K7/IP123_BIND     | MAP3K7-IP1-IP2/3 binding                                     | Irreversible |
| MAP3K7IP_TRAF6_3PHOS  | MAP3K7/IP23/1/TRAFF6 (dimer)/Ubc13/Uev1A autophosphorylation | Irreversible |
| MAP3K7IP_TRAF6_DEGR   | MAP3K7/IP/TRAFF6(dimer)/Ubc13/Uev1A degradation              | Irreversible |
| MAP3K7IP_TRAF6_UBIQ   | MAP3K7/IP23/1/TRAFF6 (dimer)/Ubc13/Uev1A autoubiquitination  | Irreversible |
| MAP3K7_IKK            | MAP3K7-mediated IKK phosphorylation                          | Irreversible |
| MAP3K7_MAP2K3         | MAP3K7-mediated MAP2K3 phosphorylation                       | Irreversible |
| MAP3K7_MAP2K4         | MAP3K7-mediated MAP2K4 phosphorylation                       | Irreversible |
| MAP3K7_MAP2K6         | MAP3K7-mediated MAP2K6 phosphorylation                       | Irreversible |
| MAP3K7_MAP2K7         | MAP3K7-mediated MAP2K7 phosphorylation                       | Irreversible |
| MAP3K7_MAP3K14        | MAP3K7-mediated MAP3K14 phosphorylation                      | Irreversible |
| MAP3K7_MAPK14         | MAP3K7-mediated MAP2K-independent MAPK14 phosphorylation     | Irreversible |
| MAP3K8(p52)_DEGR      | MAP3K8 (p52) degradation                                     | Irreversible |
| MAP3K8(p58)_DEGR      | MAP3K8 (p58) degradation                                     | Irreversible |
| MAP3K8(p58)_KSR2_BIND | MAP3K8 (p58)-KSR2 binding                                    | Irreversible |
| MAP3K8_MAP2K1         | MAP3K8-mediated MAP2K1 phosphorylation                       | Irreversible |
| MAP3K8_MAP3K14        | MAP3K8-mediated MAP3K14 phosphorylation                      | Irreversible |
| MAP3K8_NFKB_BIND      | MAP3K8 (p58/p52)-NFkB(p105) binding                          | Irreversible |
| MAP3K8_NFKB DISS      | MAP3K8(p58)-p52/NFkB dissociation                            | Irreversible |
| MAPK11_ATF2           | MAPK11-mediated ATF2 phosphorylation                         | Irreversible |
| MAPK11_ELK1           | MAPK11-mediated Elk-1 phosphorylation                        | Irreversible |
| MAPK11_MAPKAPK2       | MAPK11-mediated MAPKAPK2 phosphorylation                     | Irreversible |
| MAPK11_MAPKAPK2_BIND  | MAPK11-MAPKAPK2 binding                                      | Irreversible |
| MAPK11_MAPKAPK2_TRAN  | MAPK11/MAPKAPK2 transport                                    | Irreversible |
| MAPK11_MBP            | MAPK11-mediated MBP phosphorylation                          | Irreversible |

|                         |                                                                         |              |
|-------------------------|-------------------------------------------------------------------------|--------------|
| MAPK11_MKNK1            | MAPK11-mediated MKNK1 phosphorylation                                   | Irreversible |
| MAPK11_MS1              | MAPK11-mediated MSK1 phosphorylation                                    | Irreversible |
| MAPK11_TRAN2            | MAPK11 transport 2                                                      | Irreversible |
| MAPK14_ATF2             | MAPK14-mediated ATF2 phosphorylation                                    | Irreversible |
| MAPK14_ELK1             | MAPK14-mediated Elk-1 phosphorylation                                   | Irreversible |
| MAPK14_MAP3K7IP_TRAF6   | MAPK14-mediated MAP3K7/IP23/1/TRAF6 (dimer)/Ubc13/Uev1A phosphorylation | Irreversible |
| MAPK14_MAPKAPK2         | MAPK14-mediated MAPKAPK2 phosphorylation                                | Irreversible |
| MAPK14_MAPKAPK2_BIND    | MAPK14-MAPKAPK2 binding                                                 | Irreversible |
| MAPK14_MAPKAPK2_TRAN    | MAPK14/MAPKAPK2 transport                                               | Irreversible |
| MAPK14_MBP              | MAPK14-mediated MBP phosphorylation                                     | Irreversible |
| MAPK14_MKNK1            | MAPK14-mediated MKNK1 phosphorylation                                   | Irreversible |
| MAPK14_MS1              | MAPK14-mediated MSK1 phosphorylation                                    | Irreversible |
| MAPK14_TRAN2            | MAPK14 transport 2                                                      | Irreversible |
| MAPK3/1_DEPH            | MKP-mediated MAPK3/1 dephosphorylation                                  | Irreversible |
| MAPK3/1_DIME            | MAPK3/1 dimerization                                                    | Irreversible |
| MAPK3/1_ELK1            | MAPK3/1-mediated Elk-1 phosphorylation                                  | Irreversible |
| MAPK3/1_FOS             | MAPK3/1-mediated c-Fos hexaphosphorylation                              | Irreversible |
| MAPK3/1_MBP             | MAPK3/1-mediated MBP phosphorylation                                    | Irreversible |
| MAPK3/1_MKNK1           | MAPK3/1-mediated MKNK1 phosphorylation                                  | Irreversible |
| MAPK3/1_MKNK2           | MAPK3/1-mediated MKNK2 phosphorylation                                  | Irreversible |
| MAPK3/1_MS1             | MAPK3/1-mediated MSK1 phosphorylation                                   | Irreversible |
| MAPK3/1_MYC             | MAPK3/1-mediated c-Myc phosphorylation                                  | Irreversible |
| MAPK3/1_TRAN            | MAPK3/1 transport                                                       | Irreversible |
| MAPK3/1_TRAN2           | MAPK3/1 transport 2                                                     | Irreversible |
| MAPK8_ATF2              | MAPK8-mediated AFT2 phosphorylation                                     | Irreversible |
| MAPK8_FOS               | MAPK8-mediated c-Fos hexaphosphorylation                                | Irreversible |
| MAPK8_JUN               | MAPK8-mediated c-Jun diphosphorylation                                  | Irreversible |
| MAPK8_TRAN              | MAPK8 (JNK) transport                                                   | Irreversible |
| MAPK8_TRAN2             | MAPK8 transport 2                                                       | Irreversible |
| MAPKAPK2_2PHOS          | MAPKAPK2 autophosphorylation                                            | Irreversible |
| MAPKAPK2_CREB           | MAPKAPK2-mediated CREB phosphorylation                                  | Irreversible |
| MAPKAPK2_HSP27          | MAPKAPK2-mediated HSP27 phosphorylation                                 | Irreversible |
| MAPKAPK2_TRAN2          | MAPKAPK2 transport 2                                                    | Irreversible |
| MD2_DIME                | MD-2 dimerization                                                       | Irreversible |
| MI145Pt                 | 1D-myo-Inositol 1,4,5-trisphosphate transport, cytoplasm                | Reversible   |
| MKNK1_EIF4E             | MKNK1-mediated eIF-4E phosphorylation                                   | Irreversible |
| MKP_DEPH                | MAP kinase phosphatase dephosphorylation                                | Irreversible |
| MRAP_TLRL2              | Toll-like receptor 2 ligand (Mannuronic acid polymer)                   | Irreversible |
| MRAP_TLRL4              | Toll-like receptor 4 ligand (Mannuronic acid polymer)                   | Irreversible |
| MRNA_TLRL3              | Toll-like receptor 3 ligand (mRNA)                                      | Irreversible |
| MSK1_5PHOS              | MSK1 autophosphorylation                                                | Irreversible |
| MSK1_CREB               | MSK1-mediated CREB phosphorylation                                      | Irreversible |
| MSK1_HH3                | MSK1-mediated histone H3 phosphorylation                                | Irreversible |
| MSK1_HMG14              | MSK1-mediated HMG-14 phosphorylation                                    | Irreversible |
| MSK1_NFKB               | MSK1-mediated NF-kB (p50/p65) phosphorylation                           | Irreversible |
| MSK1_NFKB_P1K           | NF-kB P1 kinase (MSK1)                                                  | Irreversible |
| MSK1_TRAN               | MSK1-5P transport                                                       | Reversible   |
| MSK1_TRAN2              | MSK1 transport                                                          | Reversible   |
| MYD88_DIME              | MyD88 dimerization                                                      | Irreversible |
| MYD88_IRAK_TOLLIP_2PHOS | MyD88/TIR/IRAK1/IRAK4/TOLLIP autophosphorylation 2                      | Irreversible |
| MYD88_IRAK_TOLLIP_BIND  | IRAK1/TOLLIP-MyD88/TIR/IRAK4 binding                                    | Irreversible |
| MYD88_IRAK_TOLLIP DISS  | MyD88 (dimer)/IRAK1/IRAK4/TIR-TOLLIP dissociation                       | Irreversible |
| MYD88_IRAK_TOLLIP_PHOS  | MyD88/TIR/IRAK1/IRAK4/TOLLIP autophosphorylation                        | Irreversible |
| MYD88_IRF7_BIND         | TLR9-mediated MyD88-IRF7-TRAF6 (dimer) binding                          | Irreversible |
| MYD88_IRF7_BIND2        | TLR7-mediated MyD88-IRF7-TRAF6 (dimer) binding                          | Irreversible |
| MYD88_IRF7_BIND3        | TLR8-mediated MyD88-IRF7-TRAF6 (dimer) binding                          | Irreversible |
| MYD88_IRF7 DISS         | TBK1-mediated MyD88/IRF7/TRAF6 (dimer) dissociation                     | Irreversible |

|                             |                                                     |              |
|-----------------------------|-----------------------------------------------------|--------------|
| MYD88_IRF7_DISS2            | IKKe-mediated MyD88/IRF7/TRAF6 (dimer) dissociation | Irreversible |
| MYD88_MYD88S_BIND           | MyD88-MyD88s binding                                | Irreversible |
| NADPHt                      | NADPH transporter, cytoplasm                        | Reversible   |
| NADPt                       | NADP transporter                                    | Reversible   |
| NFKB(p105)_BTRCP2_BIND      | NF-kB(p105)-beta TrCP2 binding                      | Irreversible |
| NFKB(p105)_DEGR             | NF-kB (p105) degradation                            | Irreversible |
| NFKB(p105)_DEGR2            | NF-kB (p105) degradation 2                          | Irreversible |
| NFKB(p105)_DEGR3            | NF-kB (p105) degradation 3                          | Irreversible |
| NFKB(p105)_PROC             | NF-kB (p105) processing                             | Irreversible |
| NFKB(p105)_PROC2            | NF-kB (p105) processing 2                           | Irreversible |
| NFKB(p105)_UBCH5A_BIND      | NF-kB (p105)-UbcH5A binding                         | Irreversible |
| NFKB(p105)_UBIQ             | NF-kB (p105) ubiquitination                         | Irreversible |
| NFKB(p105)_UBIQ2            | NF-kB (p105) ubiquitination 2                       | Irreversible |
| NFKB(p105/p50)_BIND         | NF-kB (p105/p50) binding                            | Irreversible |
| NFKB(p105/p50)_DISS         | NF-kB (p105/p50) dissociation                       | Irreversible |
| NFKB(p50)_BCL3_BIND         | NFkB(p50) (dimer)-Bcl3 binding                      | Irreversible |
| NFKB(p50)_BCL3_TRAN         | NFkB(p50) (dimer)/Bcl3 transport                    | Irreversible |
| NFKB(p50)_IKBZ_BIND         | NFkB(p50) (dimer)-Ikbzeta binding                   | Irreversible |
| NFKB(p50)_IMPA3_BIND        | NFkB (p50)-importin alpha 3 binding                 | Irreversible |
| NFKB(p50)_IMPA3_DISS        | NFkB (p50)-importin alpha 3 dissociation            | Irreversible |
| NFKB(p50)_IMPA3_TRAN        | NF-kB(p50)/importin alpha 3 transport               | Irreversible |
| NFKB(p50)_KB_SITE_BIND      | NFkB(p50) (dimer)-kB site binding                   | Irreversible |
| NFKB(p50)_KB_SITE_DISS      | NFkB(p50) (dimer)-kB site-HDAC1 dissociation        | Irreversible |
| NFKB(p50)_TRAN              | NF-kB (p50) transport                               | Irreversible |
| NFKB(p50/p65)_CBP-5P3A_BIND | NF-kappa-B (p50/p65)-CBP binding 2                  | Irreversible |
| NFKB(p50/p65)_CBP-5P_BIND   | NF-kappa-B (p50/p65)-CBP binding                    | Irreversible |
| NFKB(p65)_DEGR              | NF-kB (p65) degradation                             | Irreversible |
| NFKB(p65)_DEGR2             | NF-kB (p65) degradation 2                           | Irreversible |
| NFKB(p65)_SOCS1_BIND        | NF-kB (p65)-SOCS1 binding                           | Irreversible |
| NFKB(p65)_UBIQ              | NF-kB (p65) ubiquitination                          | Irreversible |
| NFKB_2ACTL                  | CBP-mediated NF-kappa-B acetylation 3               | Irreversible |
| NFKB_3ACTL                  | CBP-mediated NF-kappa-B acetylation                 | Irreversible |
| NFKB_3DACL                  | HDAC3-mediated NF-kappa-B deacetylation             | Irreversible |
| NFKB_5ACTL                  | CBP-mediated NF-kappa-B acetylation 2               | Irreversible |
| NFKB_5DACL                  | HDAC3-mediated NF-kappa-B deacetylation 2           | Irreversible |
| NFKB_CBP_KB_BIND            | NF-kB (p50/p65)-CBP-kB site binding                 | Irreversible |
| NFKB_CBP_KB_DISS            | NF-kB(p5p/p65)-CBP-KB site dissociation             | Irreversible |
| NFKB_CBP_KB_DISS2           | NF-kB(p5p/p65)-CBP-KB site dissociation 2           | Irreversible |
| NFKB_IKBA_BIND              | NFkB (p50/p65)-IkbA binding                         | Irreversible |
| NFKB_IKBA_BIND2             | NFkB (p50/p65)-IkbA binding 2                       | Irreversible |
| NFKB_IKBA_BIND3             | NFkB (p50/p65)-IkbA binding 3                       | Irreversible |
| NFKB_IKBA_BIND4             | NFkB (p50/p65)-IkbA binding 4                       | Irreversible |
| NFKB_IKBA_BTRCP1_BIND       | NFkB/IkbA-betaTrCP1 binding                         | Irreversible |
| NFKB_IKBA_BTRCP2_BIND       | NFkB/IkbA-betaTrCP2 binding                         | Irreversible |
| NFKB_IKBA_DISS              | NFkB (p50/p65)-IkbA dissociation                    | Irreversible |
| NFKB_IKBA_TRAN              | NFkB (p50/p65)/IkbA transport                       | Irreversible |
| NFKB_IKBA_TRAN2             | NFkB (p50/p65)/IkbA transport 2                     | Irreversible |
| NFKB_IKBA_TRAN3             | NFkB (p50/p65)/IkbA transport 3                     | Irreversible |
| NFKB_IKBA_TRAN4             | NFkB (p50/p65)/IkbA transport 4                     | Irreversible |
| NFKB_IKBA_TRAN5             | NFkB (p50/p65)/IkbA transport 5                     | Irreversible |
| NFKB_IKBA_UBCH5_BIND        | NFkB/IkbA/UbcH5 binding                             | Irreversible |
| NFKB_IKBA_UBCH5_BIND2       | NFkB/IkbA/UbcH5 binding 2                           | Irreversible |
| NFKB_IKBB_BIND              | NFkB(p50/p65)-IkbB binding                          | Irreversible |
| NFKB_IKBB_BIND2             | NFkB (p50/p65)-IkbB binding 2                       | Irreversible |
| NFKB_IKBB_BTRCP2_BIND       | NFkB/IkbB-bTrCP2 binding                            | Irreversible |
| NFKB_IKBB_DISS              | NFkB (p50/p65)-IkbB dissociation                    | Irreversible |
| NFKB_IKBB_TRAN              | NFkB (p50/p65)/IkbB transport                       | Irreversible |
| NFKB_P1_PHOS                | NF-kB(P1 phosphorylated) (p50/p65) phosphorylation  | Irreversible |

|                         |                                                                     |              |
|-------------------------|---------------------------------------------------------------------|--------------|
| NFKB_P2_PHOS            | NF-kB(P2 phosphorylated) (p50/p65) phosphorylation                  | Irreversible |
| NFKB_P3_PHOS            | NF-kB(P3 phosphorylated) (p50/p65) phosphorylation                  | Irreversible |
| NFKB_P4_PHOS            | NF-kB(P4 phosphorylated) (p50/p65) phosphorylation                  | Irreversible |
| NFKB_P5_PHOS            | NF-kB(P5 phosphorylated) (p50/p65) phosphorylation                  | Irreversible |
| NFKB_PKAC DISS          | NF-kB(p50)/NF-kB(p65)-PKAc dissociation                             | Irreversible |
| NFKB_PKAC_IKBA_BIND     | NFkB(p50)-NFkB(p65)-IkBa-PKAc binding                               | Irreversible |
| NFKB_PKAC_IKBA DISS     | NFkB(p50)/NFkB(p65)/PKAc-IkBa dissociation                          | Irreversible |
| NFKB_PKAC_IKBB_BIND     | NFkB(p50)-NFkB(p65)-IkBb-PKAc binding                               | Irreversible |
| NFKB_PKAC_IKBB DISS     | NFkB(p50)/NFkB(p65)/PKAc-IkBb dissociation                          | Irreversible |
| NFKB_TRAN               | NF-kB (p50/p65) (5 phosphorylated) transport                        | Irreversible |
| NOD1P_BIND              | diaminopimelic acid-mediated NOD1 activation                        | Irreversible |
| NOD2P_BIND              | NOD2-muramyl dipeptide binding                                      | Irreversible |
| NSF_EEA1_RAB5_BIND      | NSF/stxn13-GTP/Rab5-EEA1/PI(3)P binding                             | Irreversible |
| NSF_STXN13_BIND         | NSF-Syntaxin 13 binding                                             | Irreversible |
| OLSCHYA_TLRL4           | Toll-like receptor 4 ligand (Oligosaccharides of hyaluronic acid)   | Irreversible |
| OMPA_TLRL2              | Toll-like receptor 2 ligand (Outer membrane protein A)              | Irreversible |
| OSPALP_TLRL2/6          | Toll-like receptor 2/6 ligand (Outer surface protein A lipoprotein) | Irreversible |
| PAIL345P_HSt            | phosphatidylinositol 3,4,5-trisphosphate transport, cytoplasm       | Reversible   |
| PAIL4P_HSt              | phosphatidylinositol 4-phosphate cytoplasmic transport (diffusion)  | Reversible   |
| PAIL_HSt                | phosphatidylinositol cytoplasmic transport (diffusion)              | Reversible   |
| PAK1_CDC42_BIND         | PAK1-Cdc42/GTP binding                                              | Irreversible |
| PAK1_MAP2K1             | PAK1-mediated MAP2K1 phosphorylation                                | Irreversible |
| PAK1_MAP2K1-2           | PAK1-mediated MAP2K1 phosphorylation 2                              | Irreversible |
| PAK1_PHOS               | PAK1 autophosphorylation                                            | Irreversible |
| PAK1_RAC1_BIND          | PAK1-Rac1/GTP binding                                               | Irreversible |
| PAK1_SRCK_RAF1          | PAK1- and SRCK-mediated Raf-1 phosphorylation                       | Irreversible |
| PAK1_SRCK_RAF1-2        | PAK1- and SRCK-mediated Raf-1 phosphorylation 2                     | Irreversible |
| PA_HSt                  | phosphatidate transport, cytoplasm                                  | Reversible   |
| PCASP8_PROC             | pro-caspase8 processing                                             | Irreversible |
| PCASP9_NOD1P_BIND       | pro caspase9-NOD1 (activated) binding                               | Irreversible |
| PCASP9_NOD2P_BIND       | pro caspase9-NOD2 (activated) binding                               | Irreversible |
| PCASP9_PROC             | pro-caspase 9 processing                                            | Irreversible |
| PCASP9_PROC2            | pro-caspase 9 processing 2                                          | Irreversible |
| PCHOLt                  | phosphatidylcholine (homo sapiens) transport                        | Reversible   |
| PDK1_AKT                | PDK1-mediated Akt phosphorylation                                   | Irreversible |
| PDK1_PHOS               | PDK1 (activated) autophosphorylation                                | Irreversible |
| PDK1_PKCA               | PDK1-mediated PKCa phosphorylation                                  | Irreversible |
| PDK1_PKCB2              | PDK1-mediated PKCb2 phosphorylation                                 | Irreversible |
| PDK1_PKCD               | PDK1-mediated PKCd phosphorylation                                  | Irreversible |
| PDK1_PKCZ               | PDK1-mediated PKCzeta phosphorylation                               | Irreversible |
| PDK1_pail345p_hs_BIND   | PDK1-phosphatidylinositol(3,4,5)-trisphosphate binding              | Irreversible |
| PHOX_GTP_BIND           | gp91/p22-p40-p47-p67-Rac1/GTP binding                               | Irreversible |
| PHOX_GTP_BIND2          | gp91/p22-p40-p47-p67-Rac1/GTP binding 2                             | Irreversible |
| PI34P5K_PHOS            | PI(3,4)P5K phosphorylation                                          | Irreversible |
| PI34P5K_pail34p_hs      | PI(3,4)P5K mediated PI(3,4)P2 phosphorylation                       | Irreversible |
| PI3K1A_PHOS             | PI3K class 1A phosphorylation                                       | Irreversible |
| PI3K1A_pail45p_hs       | PI3K class 1A mediated PI(4,5)P2 phosphorylation                    | Irreversible |
| PI3K3_BIND              | phosphoinositide 3-kinase class 3 formation                         | Irreversible |
| PI3K3_RAB5_BIND         | PI3K3-Rab5/GTP binding                                              | Irreversible |
| PI3K3_RAB5_pail_hs_BIND | PI3K3/Rab5/GTP-phosphatidylinositol binding                         | Irreversible |
| PI3P4K_PHOS             | PI(3)P4K phosphorylation                                            | Irreversible |
| PI3P4K_pail3p_hs        | PI(3)P4K-mediated PI(3)P phosphorylation                            | Irreversible |
| PI4P5K_PHOS             | PI(4)P5K phosphorylation                                            | Irreversible |
| PI4P5K_pail4p_hs        | PI4P5K-mediated PI4P phosphorylation                                | Irreversible |
| Pit                     | Inorganic phosphate exchange, diffusion                             | Reversible   |
| Pitn                    | phosphate transport, nuclear                                        | Reversible   |
| PKAC_NFKB               | PKAc-mediated NF-kB (p50/p65) phosphorylation                       | Irreversible |
| PKAC_NFKB(p50)          | PKAc-mediated NFkB(p50) phosphorylation                             | Irreversible |

|                          |                                                                                        |              |
|--------------------------|----------------------------------------------------------------------------------------|--------------|
| PKAC_NFKB_P1K            | NF-kB P1 kinase (PKAc)                                                                 | Irreversible |
| PKAC_PHOS                | PKAc autophosphorylation                                                               | Irreversible |
| PKA_CREB                 | PKA-mediated CREB phosphorylation                                                      | Irreversible |
| PKA_PHOS                 | protein kinase A autophosphorylation                                                   | Irreversible |
| PKA_RAF1                 | PKA-mediated Raf-1 phosphorylation                                                     | Irreversible |
| PKA_TRAN                 | protein kinase A transport                                                             | Reversible   |
| PKA_TRAN2                | protein kinase A (2 phosphorylated) transport                                          | Reversible   |
| PKCA_3PHOS               | PKCalpha autophosphorylation                                                           | Irreversible |
| PKCA_ca2_BIND            | PKCalpha-calcium ion binding                                                           | Irreversible |
| PKCA_ca2_P47PHOX         | PKCalpha/calcium ion-mediated p47phox phosphorylation                                  | Irreversible |
| PKCA_dag_ps_hs_BIND      | PKCalpha-diacylglycerol-phosphatidylserine binding                                     | Irreversible |
| PKCA_dag_ps_hs_P47PHOX   | PKCalpha/diacylglycerol/phosphatidylserine-mediated p47phox phosphorylation            | Irreversible |
| PKCB2_3PHOS              | PKCbeta2 autophosphorylation                                                           | Irreversible |
| PKCB2_ca2_BIND           | PKCbeta2-calcium ion binding                                                           | Irreversible |
| PKCB2_ca2_P47PHOX        | PKCbeta2/calcium ion-mediated p47phox phosphorylation                                  | Irreversible |
| PKCB2_dag_ps_hs_BIND     | PKCbeta2-diacylglycerol-phosphatidylserine binding                                     | Irreversible |
| PKCB2_dag_ps_hs_P47PHOX  | PKCbeta2/diacylglycerol/phosphatidylserine-mediated p47phox phosphorylation            | Irreversible |
| PKCD_2PHOS               | PKCd autophosphorylation                                                               | Irreversible |
| PKCD_dag_ps_hs_BIND      | PKCdelta-diacylglycerol-phosphatidylserine binding                                     | Irreversible |
| PKCD_dag_ps_hs_P47PHOX   | PKCdelta-mediated p47phox phosphorylation                                              | Irreversible |
| PKCZ_HNRNPA1             | PKCzeta-mediated hnRNPA1 phosphorylation                                               | Irreversible |
| PKCZ_NFKB                | PKCzeta-mediated NF-kB (p50/p65) phosphorylation                                       | Irreversible |
| PKCZ_NFKB_P2K            | NF-kB P2 kinase (PKCz)                                                                 | Irreversible |
| PKCZ_P47PHOX             | PKCzeta-mediated p47phox phosphorylation                                               | Irreversible |
| PKCZ_TRAN                | protein kinase C, zeta isoform transport                                               | Irreversible |
| PKCZ_TRAN2               | protein kinase C, zeta isoform transport 2                                             | Irreversible |
| PKCZ_pa_hs_BIND          | PKCzeta-phosphatidyl acid binding                                                      | Irreversible |
| PKCZ_pa_hs_PHOS          | PKCzeta/phosphatidic acid autophosphorylation                                          | Irreversible |
| PKCZ_ps_hs_BIND          | PKCzeta-phosphatidylserine binding                                                     | Irreversible |
| PKCZ_ps_hs_PHOS          | PKCzeta/phosphatidylserine autophosphorylation                                         | Irreversible |
| PKR_2PHOS                | PKR (dimer) autophosphorylation                                                        | Irreversible |
| PKR_DIMER                | PKR dimerization                                                                       | Irreversible |
| PKR_EIF2A                | PKR-mediated eIF2alpha phosphorylation                                                 | Irreversible |
| PKR_TRAF6_BIND           | PKR(dimer)-TRAF6(dimer) binding                                                        | Irreversible |
| PLCB2_ACTI               | PLC beta II activation                                                                 | Irreversible |
| PLD_ACTI                 | phospholipase D activation                                                             | Irreversible |
| PLP_TLRL11               | Toll-like receptor 11 ligand (Profilin-like protein)                                   | Irreversible |
| PP2A_ABC_TRAN            | protein phosphatase 2A transport                                                       | Reversible   |
| PP2A_ABC_TRAN2           | protein phosphatase (phosphorylated) 2A transport                                      | Reversible   |
| PP2A_DEPH                | PP2A dephosphorylation (regeneration)                                                  | Irreversible |
| PP2B_DEPH                | PP2B dephosphorylation                                                                 | Irreversible |
| PP2C_B1_DEPH             | protein phosphatase 2C, beta 1 isoform dephosphorylation                               | Irreversible |
| PP2C_B1_MAP3K7IP_TRAF6   | PP2C beta 1 isoform mediated MAP3K7/IP23/1/TRAF6(dimer)/Ubc13/Uev1A dephosphorylation  | Irreversible |
| PP2C_E_DEPH              | protein phosphatase 2C, epsilon isoform dephosphorylation                              | Irreversible |
| PP2C_E_MAP3K7IP_TRAF6    | PP2C epsilon isoform mediated MAP3K7/IP23/1/TRAF6(dimer)/Ubc13/Uev1A dephosphorylation | Irreversible |
| PPAP_DEPH                | phosphatidic acid phosphatase dephosphorylation                                        | Irreversible |
| PRE_IL1A_CALPN_3ca2_BIND | pre IL1a-calpain/calcium ion binding                                                   | Irreversible |
| PRE_IL1A_IL1R1L          | IL-1R1 ligand (pre IL-1a)                                                              | Irreversible |
| PRE_IL1A_PROC            | pre IL-1a processing                                                                   | Irreversible |
| PRE_IL1A_TRAN            | pre-IL1A transport                                                                     | Reversible   |
| PRE_IL1B_CASP1_BIND      | pre IL1beta-caspase 1 binding                                                          | Irreversible |
| PRE_IL1B_PROC            | pre IL-1beta processing                                                                | Irreversible |
| PRNS_TLRL2               | Toll-like receptor 2 ligand (Porins)                                                   | Irreversible |

|                          |                                                                             |              |
|--------------------------|-----------------------------------------------------------------------------|--------------|
| PSCHPS_TLRL4             | Toll-like receptor 4 ligand (Polysaccharide fragment of heparan sulphate)   | Irreversible |
| PSM_TLRL2                | Toll-like receptor 2 ligand (Phenol-soluble modulin)                        | Irreversible |
| PSM_TLRL2/6              | Toll-like receptor 2/6 ligand (Phenol-soluble modulin)                      | Irreversible |
| PSt3                     | phosphatidylserine (homo sapiens) transport                                 | Reversible   |
| PTG_TLRL2                | Toll-like receptor 2 ligand (Peptidoglycan)                                 | Irreversible |
| RAB5_DEPH                | Rab5 dephosphorylation                                                      | Irreversible |
| RAB5_PHOS                | Rab5 phosphorylation                                                        | Irreversible |
| RAB5_RBPTIN5_RBX5_BIND   | Rab5-Rabaptin5/Rabex5 binding                                               | Irreversible |
| RAC1_DEPH                | Rac1 dephosphorylation                                                      | Irreversible |
| RAC1_PHOS                | Rac1 phosphorylation                                                        | Irreversible |
| RAC1_VAV1_BIND           | Rac1-Vav1 binding                                                           | Irreversible |
| RAF1_DEPH1               | PP2A-mediated Raf-1 dephosphorylation                                       | Irreversible |
| RAF1_DEPH2               | Unknown phosphatase-mediated Raf-1 dephosphorylation                        | Irreversible |
| RAS_DEPH                 | Ras dephosphorylation                                                       | Irreversible |
| RAS_GTP_RAF1_BIND        | Ras/GTP-Raf1 binding                                                        | Irreversible |
| RAS_GTP_RIN1_BIND        | Ras/GTP-Rin1 binding                                                        | Irreversible |
| RAS_PHOS                 | Ras phosphorylation                                                         | Irreversible |
| RBPTIN5_RBX5_BIND        | Rabaptin5-Rabex5 binding                                                    | Irreversible |
| RHOA_DEPH                | RhoA dephosphorylation                                                      | Irreversible |
| RHOA_PHOS                | RhoA phosphorylation                                                        | Irreversible |
| RIP1_TICAM1P_BIND        | RIP1-TICAM1P-TRAF6 (dimer) binding                                          | Irreversible |
| RIP2_NOD1P_BIND          | RIP2-NOD1P binding                                                          | Irreversible |
| RIP2_NOD2P_BIND          | RIP2-NOD2P binding                                                          | Irreversible |
| RIP2_TRIP6_NOD1P_BIND    | RIP2-TRIP6-NOD1P binding                                                    | Irreversible |
| RIP2_TRIP6_TRAF2_BIND    | RIP2-TRIP6-TRAF2 binding                                                    | Irreversible |
| RKIP_MAP3K14_BIND        | RKIP-MAP3K14 binding                                                        | Irreversible |
| RKIP_MAP3K7IP_TRAF6_BIND | RKIP-MAP3K7/IP/Ubc13/Uev1A/TRAF6 (dimer) binding                            | Irreversible |
| SF_TLRL1/2               | Toll-like receptor 1/2 ligand (Soluble factors)                             | Irreversible |
| SGK_MAP3K3               | SGK-mediated MAP3K3 phosphorylation                                         | Irreversible |
| SGK_PHOS                 | SGK autophosphorylation                                                     | Irreversible |
| SIGIRR_DIME              | SIGIRR dimerization                                                         | Irreversible |
| SQSTM1_PKCZ_BIND         | Sequestosome 1 (p62)-PKCzeta binding                                        | Irreversible |
| SRCK_BTK                 | Src family tyrosine kinase-mediated BTK phosphorylation                     | Irreversible |
| SRCK_CBL                 | Src kinase-mediated c-Cbl phosphorylation                                   | Irreversible |
| SRCK_PHOS                | Src kinase autophosphorylation                                              | Irreversible |
| SRTK_PHOS                | Src-related tyrosine kinase autophosphorylation                             | Irreversible |
| SRTK_VAV1                | Src-related tyrosine kinase-mediated Vav1 phosphorylation                   | Irreversible |
| SSRNA_TLRL7              | Toll-like receptor 7 ligand (Single stranded RNA)                           | Irreversible |
| SSRNA_TLRL8              | Toll-like receptor 8 ligand (Single stranded RNA)                           | Irreversible |
| ST2L_TIRAP_BIND          | ST2L-TIRAP-MyD88 binding                                                    | Irreversible |
| STF_TLRL2/6              | Toll-like receptor 2/6 ligand (Small molecule transcription factors)        | Irreversible |
| STLR2/L_SCD14_BIND       | sTLR2-ligand-sCD14 binding                                                  | Irreversible |
| STLR2_CD14_BIND          | sTLR2-CD14 binding                                                          | Irreversible |
| STLR4_BIND               | soluble TLR4/MD2-ligand binding                                             | Irreversible |
| STLR4_MD2_BIND           | sTLR4-MD2 binding                                                           | Irreversible |
| T3RFBN_TLRL4             | Toll-like receptor 4 ligand (Type III repeat extra domain A of fibronectin) | Irreversible |
| TBK1_IRF3                | TBK1-mediated IRF3 phosphorylation                                          | Irreversible |
| TBK1_NFKB                | TBK1-mediated NF-kB (p50/p65) phosphorylation                               | Irreversible |
| TBK1_NFKB_P5K            | NF-kB P5 kinase (TBK1)                                                      | Irreversible |
| TBK1_PHOS                | TBK1 autophosphorylation                                                    | Irreversible |
| TCLDLPP_TLRL1/2          | Toll-like receptor 1/2 ligand (Triacetylated lipopeptides)                  | Irreversible |
| TICAM1P_IKKE_BIND        | TICAM1P-IKKE binding                                                        | Irreversible |
| TICAM1P_TBK1_BIND        | TICAM1P-TBK1 binding                                                        | Irreversible |
| TICAM2_TICAM1            | TICAM2/TLR4/L/MD2-mediated activation of TICAM1                             | Irreversible |
| TICAM2_TLR4/L_MD2_BIND   | TICAM2-TLR4/L/MD2 binding                                                   | Irreversible |
| TIR_MYD_BIND             | TLR9-mediated TIR-MyD88 binding                                             | Irreversible |

|                         |                                                          |              |
|-------------------------|----------------------------------------------------------|--------------|
| TIR_MYD_BIND2           | TLR1/10-mediated TIR-MyD88 binding                       | Irreversible |
| TIR_MYD_BIND3           | TLR2/10-mediated TIR-MyD88 binding                       | Irreversible |
| TIR_MYD_BIND4           | TLR10-mediated TIR-MyD88 binding                         | Irreversible |
| TIR_MYD_BIND5           | TLR11-mediated TIR-MyD88 binding                         | Irreversible |
| TIR_MYD_BIND6           | IL1R1-mediated TIR-MyD88 binding                         | Irreversible |
| TIR_MYD_BIND7           | TLR5-mediated TIR-MyD88 binding                          | Irreversible |
| TIR_MYD_BIND8           | TLR8-mediated TIR-MyD88 binding                          | Irreversible |
| TIR_MYD_BIND9           | TLR7-mediated TIR-MyD88 binding                          | Irreversible |
| TIR_MYD_FADD_BIND       | TIR/MyD88 (dimer)/FADD complex                           | Irreversible |
| TIR_MYD_IRAK4_BIND      | TIR/MyD88-IRAK4 binding                                  | Irreversible |
| TIR_MYD_TOLLIP_BIND     | TIR/TIRAP/MyD88/IRAK-IRAK1C/TOLLIP binding               | Irreversible |
| TIR_TIRAP_BIND          | TLR1/2-mediated TIR domain TIRAP binding                 | Irreversible |
| TIR_TIRAP_BIND2         | TLR2/6-mediated TIR domain TIRAP binding                 | Irreversible |
| TIR_TIRAP_BIND3         | TLR2-mediated TIR domain TIRAP binding                   | Irreversible |
| TIR_TIRAP_BIND4         | TLR4-mediated TIR domain TIRAP binding                   | Irreversible |
| TIR_TIRAP_IRAK2_BIND    | TIR/TIRAP/MyD88/IRAK4-IRAK2 binding                      | Irreversible |
| TIR_TIRAP_IRAK4_BIND    | TIR/TIRAP/MyD88-IRAK4 binding                            | Irreversible |
| TIR_TIRAP_MYD_BIND      | TIR/TIRAP-MyD88 binding                                  | Irreversible |
| TIR_TIRAP_MYD_FADD_BIND | TIR/TIRAP/MyD88 (dimer)/FADD complex                     | Irreversible |
| TIR_TIRAP_TOLLIP_2PHOS  | TIR/TIRAP/MyD88/IRAK1/IRAK4/TOLLIP diphosphorylation     | Irreversible |
| TIR_TIRAP_TOLLIP_BIND   | TIR/TIRAP/MyD88/IRAK4-IRAK1/TOLLIP binding               | Irreversible |
| TIR_TIRAP_TOLLIP_PHOS   | TIR/TIRAP/MyD88/IRAK1/IRAK4/TOLLIP phosphorylation       | Irreversible |
| TLR1/10_BIND            | Toll-like receptor 1/10 ligand binding                   | Irreversible |
| TLR1/2_BIND             | Toll-like receptor 1/2 ligand binding                    | Irreversible |
| TLR10_BIND              | Toll like receptor 10 ligand binding                     | Irreversible |
| TLR11_BIND              | Toll like receptor 11 ligand binding                     | Irreversible |
| TLR2/10_BIND            | Toll-like receptor 2/10 ligand binding                   | Irreversible |
| TLR2/6_BIND             | Toll-like receptor 2/6 ligand binding                    | Irreversible |
| TLR2/L-D_BIND           | TLR2-ligand-CD14 binding                                 | Irreversible |
| TLR2_2PHOS              | TLR2 autophosphorylation                                 | Irreversible |
| TLR2_PI3K1A             | TLR2-mediated PI3K class 1A phosphorylation              | Irreversible |
| TLR3_2PHOS              | TLR3 diphosphorylation                                   | Irreversible |
| TLR3_BIND               | Toll like receptor 3 ligand binding                      | Irreversible |
| TLR3_PI3K1A             | TLR3-mediated PI3K class 1A phosphorylation              | Irreversible |
| TLR3_TICAM1             | TLR3-mediated TICAM1 activation                          | Irreversible |
| TLR4/L_MD2_BIND         | TLR4/MD2-ligand-LBP binding                              | Irreversible |
| TLR4/L_MD2_TRD3A_BIND   | TLR4/L/MD2-TRIAD3A binding                               | Irreversible |
| TLR4/L_MD2_TRD3A_DEGR   | TLR4/L/MD2/TRIAD3A degradation                           | Irreversible |
| TLR4_MD2_BIND           | TLR4-MD2 binding                                         | Irreversible |
| TLR4_SIGIRR_BIND        | TLR4-SIGIRR binding                                      | Irreversible |
| TLR4_SIGIRR_TRAF6_BIND  | TLR4/SIGIRR-TRAF6 (dimer) binding                        | Irreversible |
| TLR5_BIND               | Toll-like receptor 5 ligand binding                      | Irreversible |
| TLR5_SIGIRR_BIND        | TLR5-SIGIRR binding                                      | Irreversible |
| TLR5_SIGIRR_TRAF6_BIND  | TLR5/SIGIRR-TRAF6 (dimer) binding                        | Irreversible |
| TLR7_BIND               | Toll-like receptor 7 ligand binding                      | Irreversible |
| TLR8_BIND               | Toll-like receptor 8 ligand binding                      | Irreversible |
| TLR9/L_TRD3A_BIND       | TLR9/L-TRIAD3A binding                                   | Irreversible |
| TLR9/L_TRD3A_DEGR       | TLR9/L/TRIAD3A degradation                               | Irreversible |
| TLR9_BIND               | Toll-like receptor 9 ligand binding                      | Irreversible |
| TLR9_SIGIRR_BIND        | TLR9-SIGIRR binding                                      | Irreversible |
| TLR9_SIGIRR_TRAF6_BIND  | TLR9/SIGIRR-TRAF6 (dimer) binding                        | Irreversible |
| TLR9_TRAN               | TLR9 transport                                           | Irreversible |
| TLRL9_TRAN              | TLR9 ligand (generic) transport                          | Irreversible |
| TOLLIP_DEGR             | Toll interacting protein degradation                     | Irreversible |
| TOLLIP_DEGR2            | Toll interacting protein degradation 2                   | Irreversible |
| TOLLIP_PHOS             | Toll interacting protein phosphorylation                 | Irreversible |
| TOLLIP_UBIQ             | Toll interacting protein (phosphorylated) ubiquitination | Irreversible |
| TOLLIP_pail345p_hs_BIND | TOLLIP-PI(3,4,5)P3 binding                               | Irreversible |



|                       |                                                                 |              |
|-----------------------|-----------------------------------------------------------------|--------------|
| TOLLIP_pail3p_hs_BIND | TOLLIP-PI(3)P binding                                           | Irreversible |
| TRAF6_DIME            | Tumor necrosis factor receptor associated factor 6 dimerization | Irreversible |
| TRAF6_SIGIRR_BIND     | TRAF6 (dimer)-SIGIRR (dimer) binding                            | Irreversible |
| TRX_NADPH_BIND        | thioredoxin-thioredoxin reductase-NADPH binding                 | Irreversible |
| TRX_OXID              | thioredoxin oxidation                                           | Irreversible |
| TRX_REDU              | thioredoxin reduction                                           | Irreversible |
| TXL_TLRL4             | Toll-like receptor 4 ligand (Taxol)                             | Irreversible |
| UBIQ_TRAN             | ubiquitin transport, cytoplasm                                  | Reversible   |
| UBIQ_TRAN2            | ubiquitin transport, nucleus                                    | Reversible   |
| UMLCPGD_TLRL9         | Toll-like receptor 9 ligand (Unmethylated CpG DNA)              | Irreversible |
| UNKN_TLRL11           | Toll-like receptor 11 ligand (Unknown)                          | Irreversible |
| ZMS_TLRL2             | Toll-like receptor 2 ligand (Zymosan)                           | Irreversible |
| ZMS_TLRL2/6           | Toll-like receptor 2/6 ligand (Zymosan)                         | Irreversible |
| adp_exch              | adp_exch                                                        | Reversible   |
| atp_exch              | atp_exch                                                        | Reversible   |
| ca2_TRAN              | calcium ion transport                                           | Irreversible |
| ca2_TRAN2             | calcium ion transport 2                                         | Irreversible |
| gdp_exch              | gdp transport                                                   | Reversible   |
| gtp_exch              | gtp transport                                                   | Reversible   |
| pa_hs_DEPH            | phosphatidic acid dephosphorylation                             | Irreversible |
| pail45p_hs_DISS       | PI(4,5)P2 hydrolysis                                            | Irreversible |
| pail45p_hs_DISS2      | PI(4,5)P2 hydrolysis 2                                          | Irreversible |
| pail45p_hs_PLCB2_BIND | PI(4,5)P2-phospholipase C beta II binding                       | Irreversible |
| pail45p_hs_PLCG_BIND  | PI(4,5)P2-phospholipase C gamma binding                         | Irreversible |
| pail_hs_PHOS          | PI3K3-mediated pail_hs phosphorylation                          | Irreversible |
| pchol_hs_DISS         | phosphatidylcholine hydrolysis                                  | Irreversible |
| pchol_hs_PLDP_BIND    | phosphatidylcholine-phospholipase D (activated) binding         | Irreversible |
