# Supplementary material for: Identification of Potential Pathway Mediation Targets in Toll-like Receptor Signaling
Source: PubMed Central journal article supplement (PMC2634968; doi:10.1371/journal.pcbi.1000292), 2009-02-20
Supplement: pcbi.1000292.s005.pdf [file pcbi.1000292.s005.pdf]

**Table S3: TLR network inputs**

| Receptor | Ligand abbreviation | Ligand name                                   |
|----------|---------------------|-----------------------------------------------|
| IL1      | PRE_IL1A            | pre IL-1A                                     |
| IL1      | PRE_IL1B            | pre IL-1B                                     |
| NOD1     | 26dap-LL            | diaminopimelic acid                           |
| NOD2     | MRDP                | muramyl dipeptide                             |
| TLR1     | SF                  | soluble factors                               |
| TLR1     | TCLDLPP             | triacylated lipoproteins                      |
| TLR1     | TLRL1/10            | TLR1/10 ligand                                |
| TLR2     | ALPS                | atypical lipopolysaccharide                   |
| TLR2     | CSGA                | CsgA                                          |
| TLR2     | DCLDLPP             | diacylated lipopeptides                       |
| TLR2     | DCLLPP              | diacyl lipopeptides                           |
| TLR2     | GCSPL               | glycoinositol phospholipids                   |
| TLR2     | GLC                 | glycolipids                                   |
| TLR2     | HSP70               | heat shock protein (70kDa)                    |
| TLR2     | LAM                 | lipoarabinomannan                             |
| TLR2     | LP                  | lipoprotein                                   |
| TLR2     | LPPS                | lipopeptides                                  |
| TLR2     | LPS_HS              | lipopolysaccharide (Homo sapiens)             |
| TLR2     | LTA                 | lipoteichoic acid                             |
| TLR2     | MRAP                | mannuronic acid polymer                       |
| TLR2     | OMPA                | outer membrane protein A                      |
| TLR2     | OSPALP              | outer surface protein A                       |
| TLR2     | PRNS                | porins                                        |
| TLR2     | PSM                 | phenol-soluble modulin                        |
| TLR2     | PTG_HS              | peptidoglycan (Homo sapiens)                  |
| TLR2     | SF                  | soluble factors                               |
| TLR2     | STF                 | soluble tuberculosis factor                   |
| TLR2     | TCLDLPP             | triacylated lipoproteins                      |
| TLR2     | TLRL2/10            | TLR2/10 ligand                                |
| TLR2     | ZMS                 | zymosan                                       |
| TLR3     | DSRNA               | double stranded RNA                           |
| TLR3     | MRNA                | mRNA                                          |
| TLR4     | BDFN2               | beta defensin 2                               |
| TLR4     | ENVP                | envelope protein                              |
| TLR4     | FBNG                | fibrinogen                                    |
| TLR4     | FUSP                | fusion protein                                |
| TLR4     | HSP60               | heat shock protein (60kDa)                    |
| TLR4     | HSP70               | heat shock protein (70kDa)                    |
| TLR4     | LPS_HS              | lipopolysaccharide (Homo sapiens)             |
| TLR4     | MRAP                | mannuronic acid polymer                       |
| TLR4     | OLSCHYA             | oligosaccharides of hyaluronic acid           |
| TLR4     | PSCHPS              | polysaccharide fragment of heparan sulphate   |
| TLR4     | T3RFBN              | type III repeat extra domain A of fibronectin |
| TLR4     | TXL                 | taxol                                         |
| TLR5     | FLGN                | flagellin                                     |
| TLR6     | DCLDLPP             | diacylated lipopeptides                       |
| TLR6     | DCLLPP              | diacyl lipopeptides                           |
| TLR6     | LTA                 | lipoteichoic acid                             |
| TLR6     | OSPALP              | outer surface protein A                       |
| TLR6     | PSM                 | phenol-soluble modulin                        |
| TLR6     | STF                 | soluble tuberculosis factor                   |
| TLR6     | ZMS                 | zymosan                                       |
| TLR7     | BPM                 | bropirimine                                   |
| TLR7     | IMQ                 | imidazoquinoline                              |

|       |         |                               |
|-------|---------|-------------------------------|
| TLR7  | LXR     | loxoribine                    |
| TLR7  | SSRNA   | single stranded RNA           |
| TLR8  | IMQ     | imidazoquinoline              |
| TLR8  | SSRNA   | single stranded RNA           |
| TLR9  | CPGCIGC | CpG chromatic IgG2a complexes |
| TLR9  | UMLCPGD | unmethylated CpG DNA          |
| TLR10 | TLRL10  | TLR10 ligand                  |
| TLR11 | PLP     | profilin-like protein         |
| TLR11 | UNKN    | unknown TLR11 ligand          |
