# Supplementary material for: Identification of Potential Pathway Mediation Targets in Toll-like Receptor Signaling
Source: PubMed Central journal article supplement (PMC2634968; doi:10.1371/journal.pcbi.1000292), 2009-02-20
Supplement: pcbi.1000292.s006.pdf [file pcbi.1000292.s006.pdf]

**Table S4: TLR network outputs**

| <b>Output</b>  | <b>Associated Reactions</b> | <b>Reaction Names</b>                                               |
|----------------|-----------------------------|---------------------------------------------------------------------|
| ROS production | DM_PHOX_GTP-3P(v)           | gp91/p22/p40/p47 (3 phosphorylated)/p67PHOX/Rac1/GTP complex demand |
| ROS production | DM_PHOX_GTP-8P(v)           | gp91/p22/p40/p47 (8 phosphorylated)/p67PHOX/Rac1/GTP complex demand |
| IRF3           | DM_ISRE_IRF3(n)             | ISRE/IRF3 complex (2 phosphorylated) demand                         |
| IRF7           | DM_ISRE_IRF7(n)             | ISRE/IRF7 complex (2 phosphorylated) demand                         |
| CRE            | CREB_CRE_BIND               | CREB-CRE site binding                                               |
| AP-1           | AP1_FOS_JUN_BIND            | AP-1 site-cFos-cJun binding                                         |
| AP-1           | AP1_JUN_BIND                | AP-1 site-cJun binding                                              |
| NF-kappa-B     | NFKB_IKBA DISS              | NFkB (p50/p65)-IκBa dissociation                                    |
| NF-kappa-B     | NFKB_IKBB DISS              | NFkB (p50/p65)-IκBb dissociation                                    |
