# Supplementary material for: Identification of Potential Pathway Mediation Targets in Toll-like Receptor Signaling
Source: PubMed Central journal article supplement (PMC2634968; doi:10.1371/journal.pcbi.1000292), 2009-02-20
Supplement: pcbi.1000292.s007.pdf [file pcbi.1000292.s007.pdf]

**Table S5: Intermediate Reactions**

| <b>Pathway</b>   | <b>Intermediate Reaction</b> | <b>Reaction Name</b>                                                |
|------------------|------------------------------|---------------------------------------------------------------------|
| IRF3             | DM_ISRE_IRF3(n)              | ISRE/IRF3 complex (2 phosphorylated) demand                         |
| IRF7             | DM_ISRE_IRF7(n)              | ISRE/IRF7 complex (2 phosphorylated) demand                         |
| ROS production   | DM_PHOX_GTP-3P(v)            | gp91/p22/p40/p47 (3 phosphorylated)/p67PHOX/Rac1/GTP complex demand |
| IL-1             | AJUBA_CPX_IKK                | PKCzeta-mediated IKK phosphorylation                                |
| MyD88            | IRAK1_TIFA_3UBIQ             | IRAK1/TIFA/TRAF6 (dimer)/Ubc13/Uev1A triubiquitination              |
| RIP1             | IKK_RIP1_TICAM1P_BIND        | IKK-RIP1/TICAM1P binding                                            |
| NOD1             | IKK_RIP2_NOD1P_BIND          | IKK-RIP2/NOD1P binding                                              |
| NOD2             | IKK_RIP2_NOD2P_BIND          | IKK-RIP2/NOD2P binding                                              |
| RIP2/TRIP6/TRAF2 | IKK_RIP2_TRIP6_TRAF2_BIND    | IKK-RIP2/TRIP6/TRAF2 binding                                        |
| PI3K             | PI3K1A_pail45p_hs            | PI3K class 1A mediated PI(4,5)P2 phosphorylation                    |
