# Supplementary material for: Identification of Potential Pathway Mediation Targets in Toll-like Receptor Signaling
Source: PubMed Central journal article supplement (PMC2634968; doi:10.1371/journal.pcbi.1000292), 2009-02-20
Supplement: pcbi.1000292.s008.pdf [file pcbi.1000292.s008.pdf]

**Table S6: Critical Network Reactions**

Note: Critical network reactions are bolded.

| Pathway                            | IRF3      | IRF7           | ROS production        | IL-1                    | RIP1                  |                       |
|------------------------------------|-----------|----------------|-----------------------|-------------------------|-----------------------|-----------------------|
| <b>Essential network reactions</b> | IRF3_DIM  | IRF7_ISRE_BIND | <b>GP91_P22</b>       | <b>PHOX_BIND</b>        | <b>AJUBA_CPX_BIND</b> | IKK_RIP1_TICAM1P_BIND |
|                                    | IRF3_ISRE | IRF7_TRAN      | PHOX_GTP_BIND2        | AJUBA_CPX_IKK           | IKK_RIP1_TICAM1P_PHOS |                       |
|                                    | IRF3_TRAI | TRAF6_DIME     | PIt                   | <b>AJUBA_CPX_PHOS</b>   | RIP1_TICAM1P_BIND     |                       |
|                                    |           | UBIQ_TRAN      | <b>RAC1_PHOS</b>      | IL1/L_IL1RAP_BIND       | TRAF6_DIME            |                       |
|                                    |           |                | <b>RAC1_VAV1_BIND</b> | IL1R1_BIND              |                       |                       |
|                                    |           |                |                       | <b>SQSTM1_PKCZ_BIND</b> |                       |                       |

| Pathway                            | NOD1      | NOD2           | RIP2/TRIP6/TRAF2     | MYD88               | PI3K |                   |
|------------------------------------|-----------|----------------|----------------------|---------------------|------|-------------------|
| <b>Essential network reactions</b> | IKK_RIP2  | IKK_RIP2_NOD2P | IKK_RIP2_TRIP6_TRAF2 | <b>IRAK1_TIFA_3</b> | UBIQ | PAIL4P_HSt        |
|                                    | IKK_RIP2  | IKK_RIP2_NOD2P | IKK_RIP2_TRIP6_TRAF2 | <b>MYD88_DIME</b>   |      | PI3K1A_pail45p_hs |
|                                    | NOD1P_BIN | NOD2P_BIND     | RIP2_TRIP6_TRAF2_BIN | UBIQ_TRAN           |      | PI4P5K_PHOS       |
|                                    | RIP2_NOD  | RIP2_NOD2P_BIN | TLR2/L-D_BIND        |                     |      | PI4P5K_pail4p_hs  |
